# Supplementary material for: Recent origin and rapid speciation of Neotropical orchids in the world's richest plant biodiversity hotspot
Source: PubMed Central journal article supplement (PMC5575461; doi:10.1111/nph.14629), 2017-06-20
Supplement: NPH-215-891-s001.pdf [file NPH-215-891-s001.pdf]

## **New Phytologist Supporting Information**

**Article title:** Recent origin and rapid speciation of Neotropical orchids in the world's richest plant biodiversity hotspot

**Authors:** Oscar Alejandro Pérez-Escobar<sup>a,1</sup>, Guillaume Chomicki<sup>b,1</sup>, Fabien L. Condamine<sup>c</sup>, Adam P. Karremans<sup>d,e</sup>, Diego Bogarín<sup>d,e</sup>, Nicholas J. Matzke<sup>f</sup>, Daniele Silvestro<sup>g,h</sup>, Alexandre Antonelli<sup>g,i</sup>

<sup>a</sup>Identification and Naming Department, Royal Botanic Gardens, Kew, Richmond, Surrey, TW9 3DS, UK. <sup>b</sup>Systematic Botany and Mycology, University of Munich (LMU), 67 Menzinger Str., Munich 80638, Germany. <sup>c</sup>CNRS, UMR 5554 Institut des Sciences de l'Évolution (Université de Montpellier), Place Eugène Bataillon, 34095 Montpellier, France. <sup>d</sup>Lankester Botanical Garden, University of Costa Rica, P.O. Box 302-7050 Cartago, Costa Rica. <sup>e</sup>Naturalis Biodiversity Center, Leiden, 2333 CR, The Netherlands. <sup>f</sup>Division of Ecology, Evolution, and Genetics, Research School of Biology, The Australian National University, Canberra, ACT 2601, Australia.

<sup>g</sup>Department of Biological and Environmental Sciences, University of Gothenburg, 413 19 Gothenburg, Sweden; <sup>h</sup>Department of Ecology and Evolution, Biophore, University of Lausanne, 1015 Lausanne, Switzerland; <sup>i</sup>Gothenburg Botanical Garden, Carl Skottsbergs gata 22A, 41319, Gothenburg, Sweden.

<sup>1</sup>These authors contributed equally to this study.

Article acceptance date: 07 April 2017

The following Supporting Information is available for this article:

**Methods S1**

**Supplementary figures S1-S29**

**Supplementary tables S1-S11**

## Methods S1 Extended Materials and Methods

### *Molecular clock dating of Orchidaceae-wide phylogeny*

Molecular clock dating relied on the uncorrelated lognormal relaxed clock model implemented in BEAST v.2 (Bouckaert *et al.*, 2014). We also used the GTR + G nucleotide substitution model with 6 rate categories, a Yule tree prior, and a Markov chain Monte Carlo (MCMC) chain length of 100 million generations, sampling every 10,000 generations. Four fossil calibrations were used. The oldest known fossil of the Asparagales (105 million yr; Walker & Walker, 1984) was used as a maximal calibration point for the Orchidaceae, following Gustafsson *et al.*, (2010), and was given a large normal prior (offset = 105.3; stdev = 8). A gamma distribution was used on each of the three ingroup fossil constraints (the offset value was set to the minimum age of each fossil and the standard deviation was set such that the maximum age was included in the 97.5% quantile). The fossil orchid *Meliorchis caribea* (15–20 million yr) has been assigned to the Goodyerinae (Ramírez *et al.*, 2007), and provided a minimum age for the subtribe (offset = 15; stdev= 5). Two recently discovered orchid macrofossils (*Dendrobium winikaphyllum* and *Earina fouldenensis*; both 20–23 million yr; Conran *et al.*, 2009) were used as minimum constraints within Epidendroideae, with gamma priors (offset = 20; stdev= 4.5). The trees were summarized using TREEANNOTATOR v. 1.8.0 (part of the BEAST package), with a 10% burn-in and a 0.98 posterior probability limit. For the Cymbidieae and the Pleurothallidinae, we used the concatenated nuclear-plastid datasets, using parameters as described above, except the MCMC chain length, which consisted of two runs 100 million generations combined with LogCombiner (part of the BEAST software).

### *Ancestral range estimation*

To ensure that all taxa sampled in our Cymbidieae and Pleurothallidinae phylogenies were represented by at least one distribution record, we further included manually in our geographical record databases the type localities of species without available herbarium specimens. Distribution maps of Cymbidieae and Pleurothallidinae were generated on the software ARCGIS (Esri). To better understand diversity distribution patterns in Pleurothallidiane and Cymbidiae, we further generated density herbarium records for both clades based on the



distribution data compiled from herbarium and online repositories (see above). Data stored at online repositories such as GBIF is often redundant, and herbarium records are subject to sampling intensity (i.e. poorly sampled areas vs. extensively sampled areas) (Hijmans & Elith, 2016). To account for these biases, we filtered distribution record data by randomly sampling one distribution record for each  $0.50 \times 0.50$  arc degree cell following Hijmans & Elith' (2016) protocol. Density herbarium records maps (Figs. S27, S28) were generated by extrapolating the number of occurrences per grid cell ( $1 \times 1$  arc degree) to the geographical distribution range of Cymbidieae and Pleurothallidinae.

We generated 50 biogeographical stochastic maps in BioGeoBEARS, and plotted the relative frequencies of all four biogeographic processes over time for all geographic areas together and separately. Ancestral range estimations and stochastic character mapping were performed on the chronogram obtained in the dating analysis. BioGeoBEARS requires fully bifurcating trees (i.e. trees without negative branches or polytomies) as input data. Therefore, we pruned from our Cymbidieae dated phylogeny the branch leading to all Coleopsidinae species (4 tips) because it formed a polytomy together with the clade including all Maxillariinae sampled taxa. We ran our BioGeoBEARS analyses in a high performance Linux cluster at the Leibniz Supercomputing Centre (LRZ, Munich, Germany).

#### *Ancestral character state estimation*

We carried out Maximum Likelihood estimations of discrete (i.e. pollination syndromes) and continuous (i.e. altitude) characters on the maximum clade credibility trees obtained from BEAST analysis. We relied on the functions *make.simmap* and *contMap* of the R package PHYTOOLS (Revell, 2012) for the estimation of discrete and continuous characters, respectively. To account for phylogenetic uncertainty, we executed every ACS estimation on 1000 randomly sampled, post burn-in trees derived from the BEAST analyses. For pollination syndromes' ACS estimation, a single rate model (ER) fit best our data over Symmetric rate (SYM) and All Rate Dependent (ARD) models, and probability scores of every state at nodes were summarized across the 1000 phylogenies as posterior probability values. A comparison of likelihood values from all implemented models revealed that SYM is the fittest model for pollination syndrome

ACS. In addition, to better understand how altitudinal range has varied over time in Pleurothallidinae and Cymbidieae, we estimated the variation of mean altitude values as a continuous character over Ma, using the function phenogram of the R package PHYTOOLS (Revell, 2012).

#### *Paleo-elevation-dependent diversification*

We developed and applied four models in RPANDA in which rates were modified by an exponential function of paleo-environment: (i) speciation rate varies with the environmental variable and no extinction; (ii) speciation rate varies with the environmental variable and extinction rate is constant; (iii) speciation rate is constant and extinction rate varies with the environmental variable; and (iv) speciation and extinction rates both vary with the environmental variable. These models were compared to simpler diversification models, namely a pure speciation model (Yule) and a constant rate birth-death models. Speciation and extinction rates inferred under the best model were plotted through time. The strength of the correlation between diversification rates and the paleo-environmental variables is indicated by the  $\alpha$  (speciation) and  $\beta$  (extinction) parameters; these parameters additionally determine the degree to which the resulting diversification curve approximates the input paleo-environmental data.

#### *Rates of species diversification in RPANDA*

We further cross-validated rates of species diversification rates obtained in BAMM by estimating rate variation through time in the four clades for which BAMM detected shifts of diversification rates (see *results*) using the R package RPANDA v.1.1 (Morlon *et al.*, 2016). We compared rate variation of these clades by including in the analysis predominantly lowland based lineages (Catasetinae in Cymbidieae, and *Specklinia* in Pleurothallidinae), in which no shifts of diversification rates were detected. We fit four models following Morlon *et al.* (2011), with different settings of constant and variable speciation and extinction rates as follows: (i)  $M_1$ : constant speciation and extinction rates; (ii)  $M_2$ : constant extinction rates but variable speciation rates; (iii)  $M_3$ : constant speciation rates but variable extinction rates; (iv)  $M_4$ : variable speciation and extinction rates.

### *Geographic state-dependent analyses*

We tested three different models: (i)  $M_a$ : free speciation and extinction rates in A, B and between regions (i.e. AB); (ii)  $M_b$ : within-region speciation not allowed (i.e. set to 0) and (iii)  $M_c$ : independent regional speciation and extinction are equal in A and B set to be equal ( $s_A = s_B$ ;  $x_A = x_B$ ). We chose an epsilon value (speciation/extinction ratio) of 0.114, which is specific for the group of study (estimated for higher monocots by Magallón & Sanderson, [2001]), to generate a starting point for parameter estimation, as suggested in the manual. We summarized the posterior distributions of samples to assess variation in net diversification, turnover, and transition rates across areas. We further simulated neutral characters by randomly reshuffling the coded areas onto the phylogeny to determine whether the diversification rates associated with biogeographic areas detected in GeoSSE could be artefacts because of Type I errors biases in SSE models (Rabosky & Goldberg, 2015). We carried 1000 iterations, estimating the AICc of the best model for each iteration to get the AICc null distribution and compare it with our real dataset AIC model value (i.e.  $\Delta AIC$ ).

## References

- Bouckaert R, Heled J, Kühnert D, Vaughan T, Wu CH, Xie D, Suchard MA, Rambaut A, Drummond AJ. 2014.** BEAST 2: a software platform for Bayesian evolutionary analysis. *PLoS Computational Biology* **10**: 1–6.
- Gustafsson ALS, Verola CF, Antonelli A. 2010.** Reassessing the temporal evolution of orchids with new fossils and a Bayesian relaxed clock, with implications for the diversification of the rare South American genus *Hoffmannseggella* (Orchidaceae : Epidendroideae). *BMC evolutionary biology* **10**: 177–190.
- Hijmans RJ, Elith J. 2016.** Species distribution modeling with R. *R package version 0.8*. <https://cran.r-project.org/package=raster>.
- Magallón S, Sanderson MJ. 2001.** Absolute diversification rates in angiosperm clades. *Evolution* **55**: 1762–1780.
- Morlon H, Lewitus E, Condamine FL, Manceau M, Clavel J, Drury J. 2016.** RPANDA: An R package for macroevolutionary analyses on phylogenetic trees. *Methods in Ecology and Evolution* **7**: 589–597.
- Morlon H, Parsons TL, Plotkin JB. 2011.** Reconciling molecular phylogenies with the fossil record. *Proceedings of the National Academy of Sciences of the United States of America* **108**: 16327–16332.
- Rabosky DL, Goldberg EE. 2015.** Model inadequacy and mistaken inferences of trait-dependent speciation. *Systematic Biology* **64**: 340–355.
- Ramírez SR, Gravendeel B, Singer RB, Marshall CR, Pierce NE. 2007.** Dating the origin of the Orchidaceae from a fossil orchid with its pollinator. *Nature* **448**: 1042–1045.
- Revell LJ. 2012.** Phytools: an R package for phylogenetic comparative biology (and other things). *Methods in Ecology and Evolution* **3**: 217–223.
- Walker JW, Walker AG. 1984.** Ultrastructure of lower Cretaceous angiosperm pollen and early evolution of flowering plants. *Annals of the Missouri Botanical Garden* **71**: 464–521.

## Supplementary figures

**Fig. S1** Distribution map of Cymbidieae obtained from ca 19000 records sourced from herbaria collections and GBIF (see methods).

**Fig. S2** Distribution map of Pleurothallidinae obtained from ca 10000 records sourced from herbaria collections and GBIF (see methods).

**Fig. S3** Potential conflicting Operational Terminal Units (OTUs) between nuclear and plastid derived phylogenies of Cymbidieae as inferred by PACo. Terminals with normalized squared residual values higher than the cut-off threshold (red line) are potentially conflicting taxa.

**Fig. S4** Potential conflicting Operational Terminal Units (OTUs) between nuclear and plastid derived phylogenies of Pleurothallidinae as inferred by PACo. Terminals with normalized squared residual values higher than the cut-off threshold (red line) are potentially conflicting taxa. Blue bars represent 95% empirical confidence intervals are shown.

**Fig. S5** Maximum Likelihood phylogeny of the orchid tribe Cymbidieae inferred from concatenated nuclear and plastid loci. Likelihood Bootstrap Support (LBS) values > 75 are shown at nodes of the tree (black pie diagrams indicate LBS of 100). Sub-tribe members of Cymbidieae are colour-coded. Pictures enclosed on circles show selected representatives of (a) Cymbidiinae (*Grammatophyllum measuresianum*); (b) Catasetinae (*Cycnoches egertonianum*); (c) Eulophiinae (*Eulophia streptopetala*); (d) Zygopetaliinae (*Zygopetalum* aff. *brachypetalum*); (e) Coeliopsidinae (*Peristeria cerina*); (f) Stanhopeinae (*Stanhopea maculosa*); (g) Maxillariinae (*Sudamerlycaste cinnabarina*); (h) Oncidiinae (*Trichoceros* sp.). Photos: O. Pérez.

**Fig. S6** Maximum Likelihood phylogeny of the orchid subtribe Pleurothallidinae inferred from concatenated nuclear and plastid loci. Likelihood Bootstrap Support (LBS) values > 75 are shown at nodes of the tree (black pie diagrams indicate LBS of 100). Generic members of Pleurothallidinae are colour-coded. Pictures enclosed on circles show selected representatives of (a) *Lepanthes* (*Lepanthes* sp.); (b) *Dracula* (*D. astuta*); (c) *Masdevallia* (*M. utricularia*); (d) *Muscarella* (*M. exesilabia*); (e) *Platystele* (*P. porquinqua*); (f) *Pabstiella* (*P. ephemera*); (g) *Pleurothallis* (*P. adventurae*); (h) *Dresslerella* (*D. pilosissima*); (i) *Myoxanthus* (*M. colothrix*); (j) *Acianthera* (*A. cogniauxiana*). Photos: A. Karremans, D. Bogarín and O. Pérez.

**Fig. S7** Chronogram for Orchidaceae obtained under a relaxed clock model, applied to a concatenated nuclear ITS, and plastid *matK*, *trnL-F*, and *rbcL* loci. The Most Recent Common Ancestors (MRCAs) of Orchidaceae, Cymbidieae and Pleurothallidinae are highlighted with stars. Mean absolute ages and 95% Confidence Intervals (blue bars) are shown. Time scale is provided in million years ago (MYA).

**Fig. S8** Chronogram of Cymbidieae obtained under a relaxed clock model, applied to concatenated nuclear and plastid loci. 95% Confidence Intervals (blue bars) are shown. Time scale is provided in million years ago (MYA). Sub-tribal members of Cymbidieae are colour-coded.

**Fig. S9** Chronogram of Pleurothallidinae obtained under a relaxed clock model, applied to concatenated nuclear and plastid loci. 95% Confidence Intervals (blue bars) are shown. Time scale is provided in million years ago (MYA). Generic members of Pleurothallidinae are colour-coded.

**Fig. S10** Biogeographic history of Cymbidieae orchids. Pie diagrams at nodes indicate the probability of estimated ancestral area as inferred by BioGeoBEARS. Grey pies indicate nodes with ambiguous ancestral areas. Geographical ranges of every taxon are shown as vertical bars in front of the terminals. Time scale is provided in million years ago (MYA). The Most Recent Common Ancestor (MRCA) of Cymbidieae is indicated with a star. (Inset) Coded areas for biogeographical analysis. Political division obtained from DIVA-GIS (<http://www.diva-gis.org/gdata>).

**Fig. S11** Ancestral character estimation of altitude as a continuous character on a chronogram of Cymbidieae. Changes in diversification rates are indicated with red circles. Sub-tribal members of Cymbidieae are colour-coded. Ancestral areas of ancestors estimated to have inhabited in Amazonia and Northern Andes are shown. Time scale is provided in million years ago (MYA). Note that almost all shifts on diversification rates took place at Andean based clades.

**Fig. S12** Ancestral character estimation of altitude as a function of time (MYA). The graph shows variation of mean elevation values across time in Cymbidieae. Note the elevation value of ~900

m reconstructed at the Cymbidieae Most Recent Common Ancestor (MRCA), and mean elevation values of the Andean ancestors (colour-coded) as inferred by BioGeoBEARS centred between ~900 – 1300 m.

**Fig. S13** Biogeographic history of Pleurothallidinae orchids. Pie diagrams at nodes indicate the probability of estimated ancestral area as inferred by BioGeoBEARS. Grey pies indicate nodes with ambiguous ancestral areas. Geographical ranges of every taxon are shown as vertical bars in front of the terminals. Time scale is provided in million years ago (MYA). The Most Recent Common Ancestor (MRCA) of Pleurothallidinae is indicated with a star. (Inset) Coded areas for biogeographical analysis. Political division obtained from DIVA-GIS (<http://www.diva-gis.org/gdata>).

**Fig. S14** Ancestral character estimation of altitude as a continuous character on a chronogram of Pleurothallidinae. Changes in diversification rates are indicated with red circles. Generic members of Pleurothallidinae are colour-coded. Time scale is provided in million years ago (MYA). Ancestral areas of ancestors estimated to have inhabited in Central America and Northern Andes are shown. Note that all shifts on diversification rates took place at Andean based clades.

**Fig. S15** Ancestral character estimation of altitude as a function of time (MYA). The graph shows variation of mean elevation values across time in Pleurothallidinae. Note the elevation value of ~1100 m reconstructed at the Pleurothallidinae Most Recent Common Ancestor (MRCA), and mean elevation values of Andean ancestors (colour-coded) as inferred by BioGeoBEARS centred between ~1200 – 1350 m.

**Fig. S16** Frequency of relevant biogeographical events (i.e. founder speciation event, local extinction, within region speciation and vicariance) through time in A) Cymbidieae, and B) Northern Andean Cymbidieae clades as inferred by Biogeographical Stochastic Mapping (BSM). Time scale is provided in million years ago (MYA).

**Fig. S17** Frequency of relevant biogeographical events (i.e. founder speciation event, local extinction, within region speciation and vicariance) through time in A) Pleurothallidiane, B) Northern Andean, and C) Central American Pleurothallidinae clades as inferred by Biogeographical Stochastic Mapping (BSM). Time scale is provided in million years ago (MYA).

**Fig. S18** Phylorate plot of Cymbidieae and the tree best configuration shifts in diversification rates as inferred in BAMM (see methods). Colour intensity across branches is proportional to diversification rates. Posterior probabilities ( $f$ ) of every configuration shift is provided. Black circles indicate the location of rate shifts, with circle size proportional to the marginal probability of the shift. Sub-tribal members of Cymbidieae are colour-coded.

**Fig. S19** Tip speciation rates of Cymbidieae Andean clades with diversification rate shifts compared with other lowland based clades as inferred in BAMM (see methods). Grey bars represent minimum and maximum speciation rate values. Black circles represent outliers.

**Fig. S20** Phylorate plot of Pleurothallidinae and the tree best configuration shifts in diversification rates as inferred in BAMM (see methods). Colour intensity across branches is proportional to diversification rates. Posterior probabilities ( $f$ ) of every configuration shift is provided. Black circles indicate the location of rate shifts, with circle size proportional to the marginal probability of the shift. Generic members of Pleurothallidinae are colour-coded.

**Fig. S21** Tip speciation rates of Pleurothallidinae Andean clades with diversification rate shifts compared with *Specklinia* clade (no diversification rate shifts) as inferred in BAMM. Grey bars represent minimum and maximum speciation rate values. Black circles represent outliers.

**Fig. S22** Diversity through time of Cymbidieae Andean clades with diversification rate shifts compared with other lowland based clades as inferred in RPANDA (see methods).

**Fig. S23** Diversity through time of Pleurothallidinae Andean clades with diversification rate shifts compared with *Specklinia* clade (no diversification rate shifts) as inferred in RPANDA.

**Fig. S24** Null distribution of delta Akaike Informative Criterion ( $\Delta$ AIC) obtained by randomly shuffling geographical distribution data of (A) Cymbidieae and (B) Pleurothallidinae in GeoSSE.

**Fig. S25** Distribution of Cymbidieae species nested in clades with shifts on diversification rates (i.e. with high speciation rates) and lineages with low speciation rates. A) Maxillariinae; B) Oncidiinae; C) Zygopetalinae.

**Fig. S26** Distribution of Pleurothallidinae species nested in clades with shifts on diversification rates (and hence high speciation rates) and lineages with low speciation rates (i.e. *Acianthera* species). A) *Lepanthes* + *Lepanthopsis*; B) *Masdevallia* + *Dracula*; C) *Pabstiella* + *Pleurothallis* + *Stelis*.



**Fig. S27** Density herbarium record of Cymbidieae, based on ~1900 filtered distribution records. Colour intensity represent number of herbarium records per grid-cell (0.50 x 0.50 arc degrees; see methods).

**Fig. S28** Density herbarium record of Pleurothallidinae, based on ~700 filtered distribution records. Colour intensity represent number of herbarium records per grid-cell (0.50 x 0.50 arc degrees; see *Methods*).

**Fig. S29** Ancestral Character Estimation of pollination syndromes of Cymbidieae. Bars at nodes represent probabilities of states estimated at nodes. Coded character states for every taxon sampled in our phylogeny are shown as vertical bars in front of every taxon name. Shifts in diversification rates as inferred in BAMM are indicated with orange circles. Sub-tribe members of Cymbidieae are colour-coded.

### Supplementary tables

**Table S1** Species names and voucher information (GI - GenBank accession numbers) for material used to build Cymbidieae dataset. Taxa newly sequenced are indicated in bold letters. Names in bold correspond to newly sequenced taxa.

**Table S2** Species names and voucher information (GenBank accession numbers) for material used to build Pleurothallidinae dataset. Taxa newly sequenced are indicated in bold letters. Names in bold correspond to newly sequenced taxa.

**Table S3** Comparison of different biogeographic models fitted on Cymbidieae dataset as implemented in BioGeoBEARS package. Akaike Informative Criterion (AIC) values, including model weights and the corresponding ratios are provided for each model.

**Table S4** Comparison of different biogeographic models fitted on Pleurothallidinae dataset as implemented in BioGeoBEARS package. Akaike Informative Criterion (AIC) values, including model weights and the corresponding ratios are provided for each model.

**Table S5** Bayes Factor for a model with up to 10 diversification rate shifts compared to a null model with 0 shifts as inferred from Cymbidieae dataset.

**Table S6** Bayes Factor of diversification rate shifts as inferred from Pleurothallidinae dataset.

**Table S7** Akaike Informative Criterion (AIC) values for four diversification models fitted on

Andean-centred Cymbidieae clades with diversification shift rates compared with a lowland-centred lineage (Catasetinae) as inferred in RPANDA package. AIC values from the fittest model are highlighted in bold.

**Table S8** Akaike Informative Criterion (AIC) values for four diversification models fitted on Andean-centred Pleurothallidinae clades with diversification shift rates compared with a clade without diversification shift rates (*Specklinia*) as inferred in RPANDA package. AIC values from the fittest model are highlighted in bold.

**Table S9** AIC values for three area diversification models fitted on Cymbidieae and Pleurothallidinae dataset as inferred in GeoSSE. AIC values from the fittest model are highlighted in bold.

**Table S10** Results of the paleo-elevation-dependent model of diversification on the four Northern Andean Cymbidieae clades (A-D). Models are as follows: two null models (a Yule model and a constant birth-death model); BAltiVar has only speciation that varies with past elevation; BAltiVarDcst has speciation that varies with past elevation and constant extinction; BcstDAltiVar has constant speciation and extinction; that varies with past elevation; and BAltiVarDAltiVar has both speciation and extinction that vary with past elevation. EXPO means exponential variation of the rates. Values are the means calculated from the fit of maximum likelihood models on a random sample of 100 dated trees (obtained from the BEAST dating analysis). The Akaike weight ( $\omega$ ) is used to compare all the models together to select the best-fit model (highlighted in bold).

**Table S11** Results of the paleo-elevation-dependent model of diversification on three Northern Andean Pleurothallidinae clades (A-C). Models are as follows: two null models (a Yule model and a constant birth-death model); BAltiVar has only speciation that varies with past elevation; BAltiVarDcst has speciation that varies with past elevation and constant extinction; BcstDAltiVar has constant speciation and extinction; that varies with past elevation; and BAltiVarDAltiVar has both speciation and extinction that vary with past elevation. EXPO means exponential variation of the rates. Values are the means calculated from the fit of maximum likelihood models on a random sample of 100 dated trees (obtained from the BEAST dating analysis). The Akaike weight ( $\omega$ ) is used to compare all the models together to select the best-fit model (highlighted

in bold).

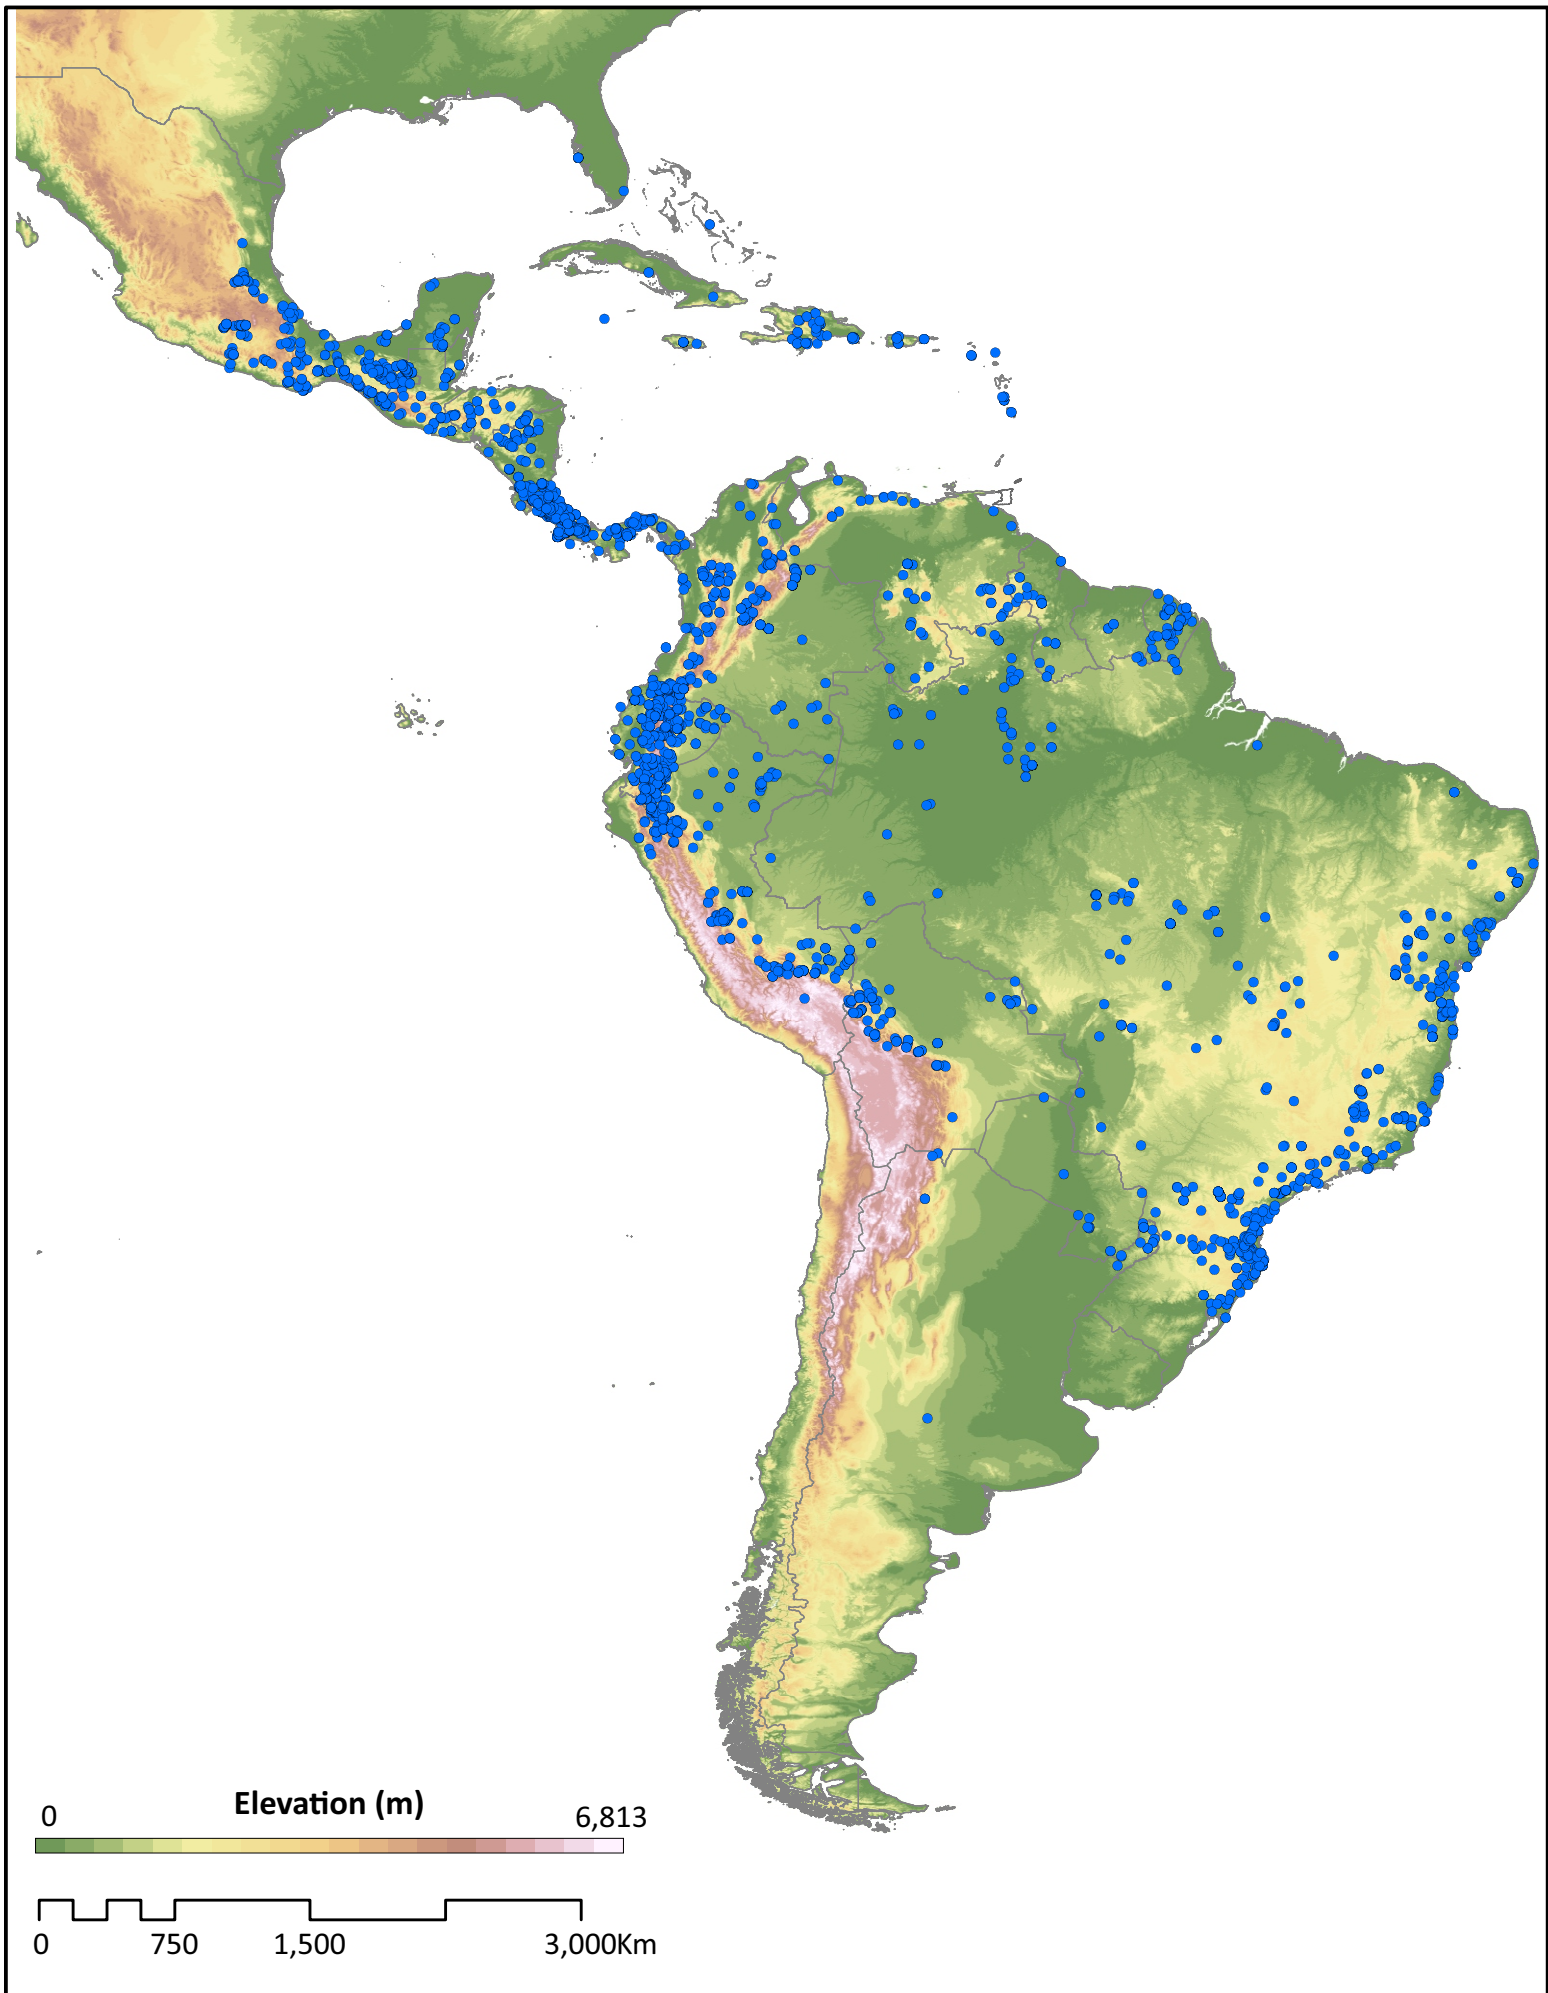

**Figure S1.** Distribution records of Cymbidieae (~19000 records)

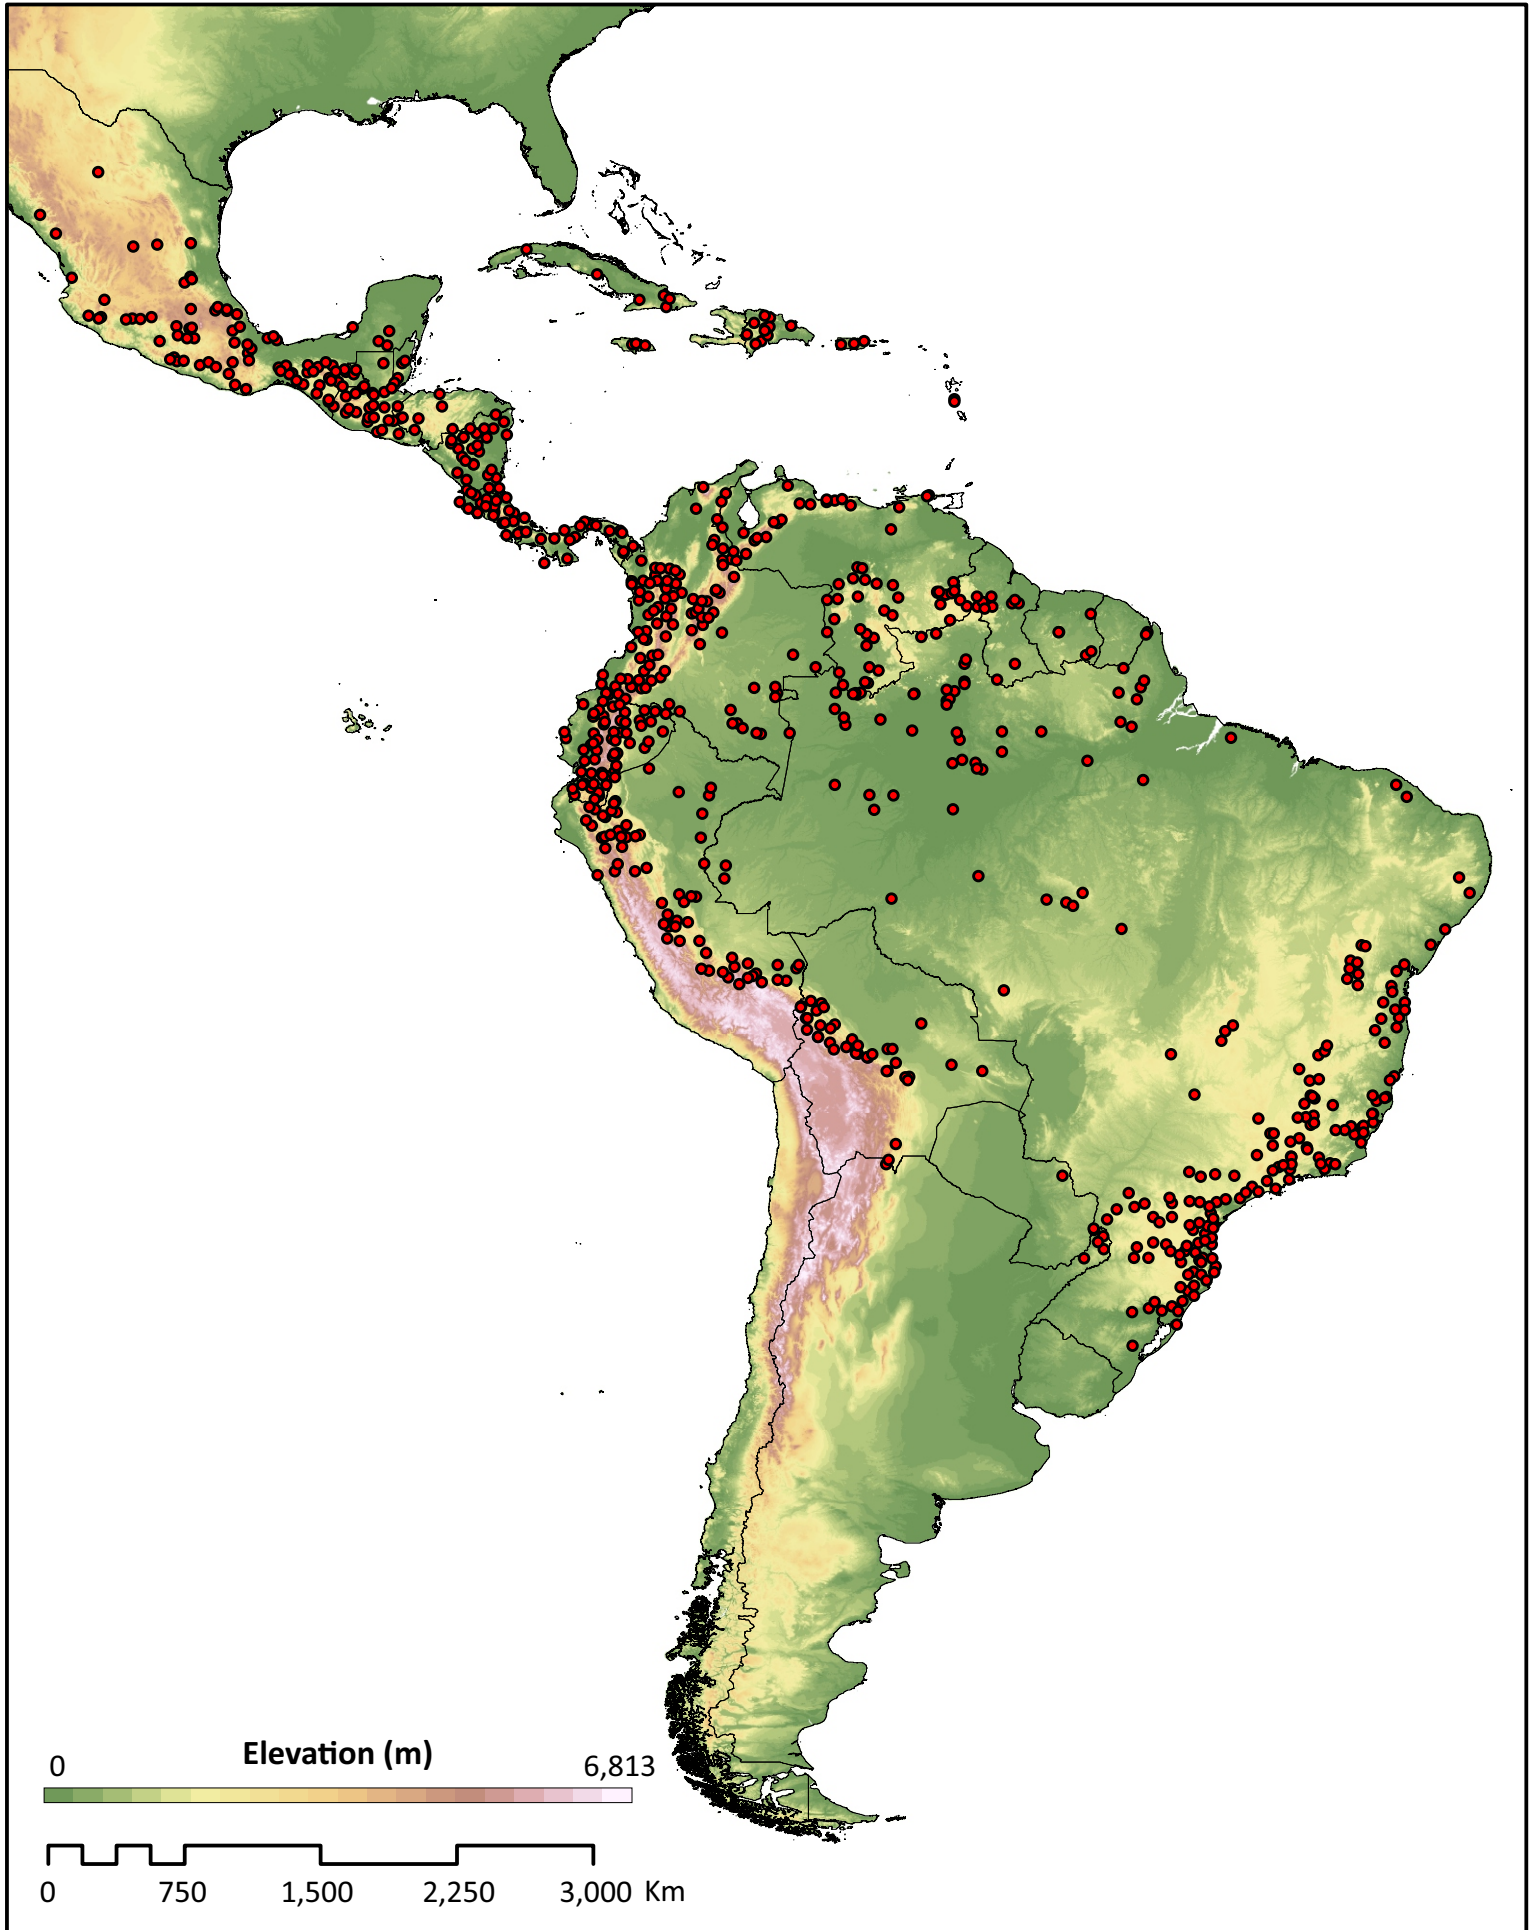

**Figure S2.** Distribution records of Pleurothallidinae (~10000 records)

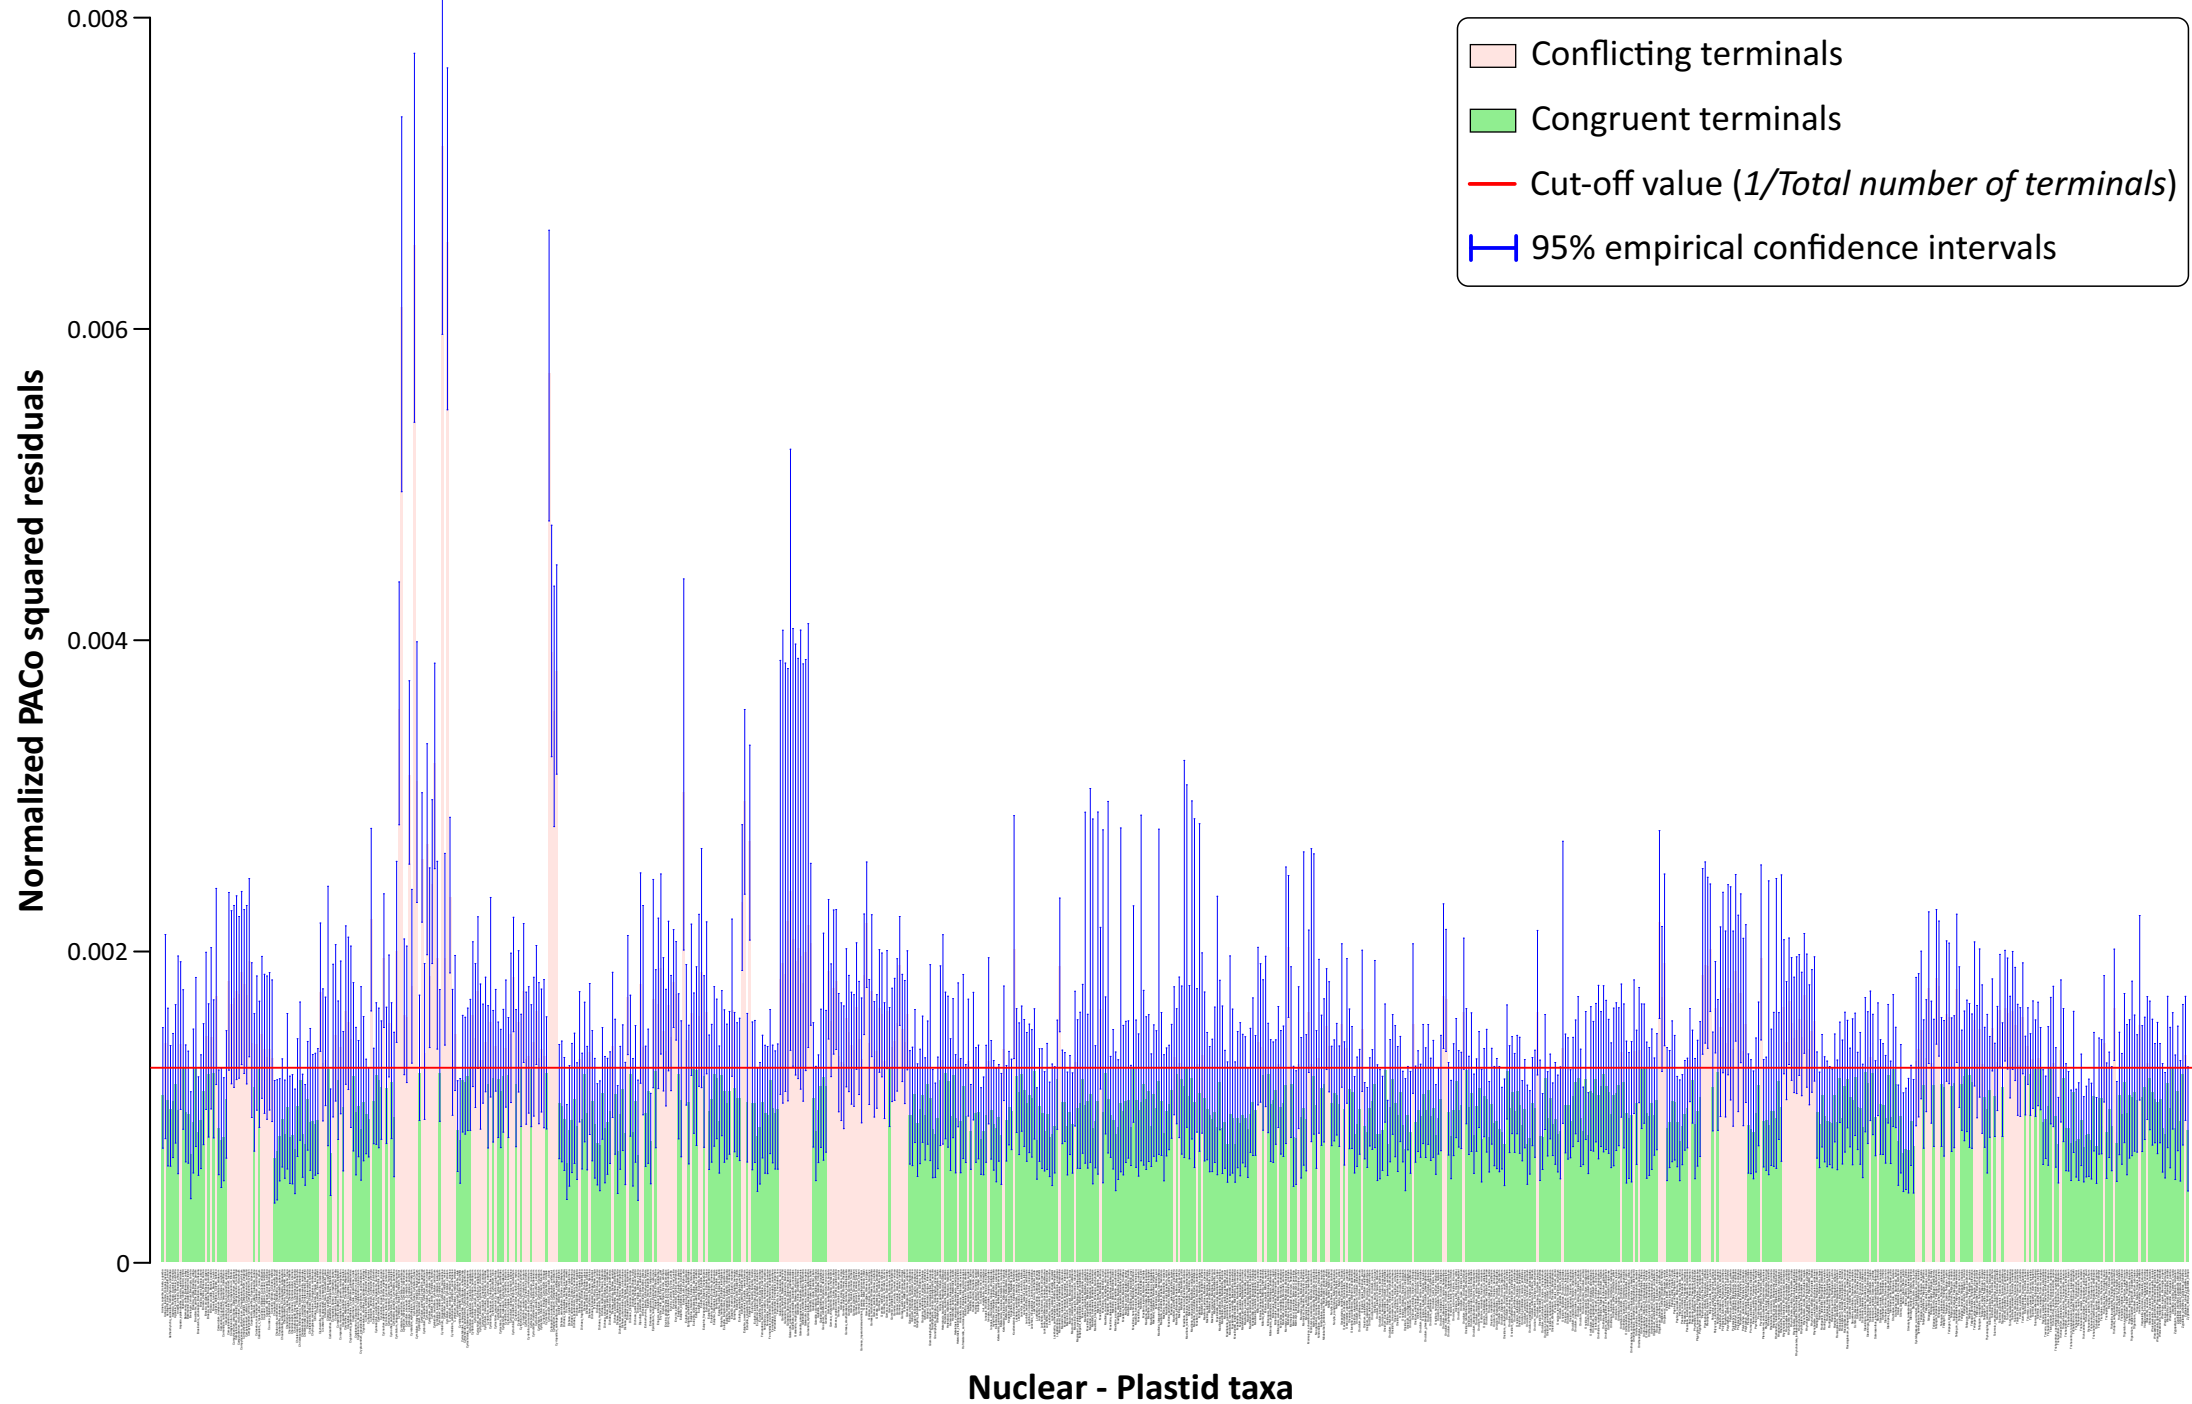

**Figure S3.** Potential conflicting OTUs between nuclear and plastid derived phylogenies in Cymbidieae



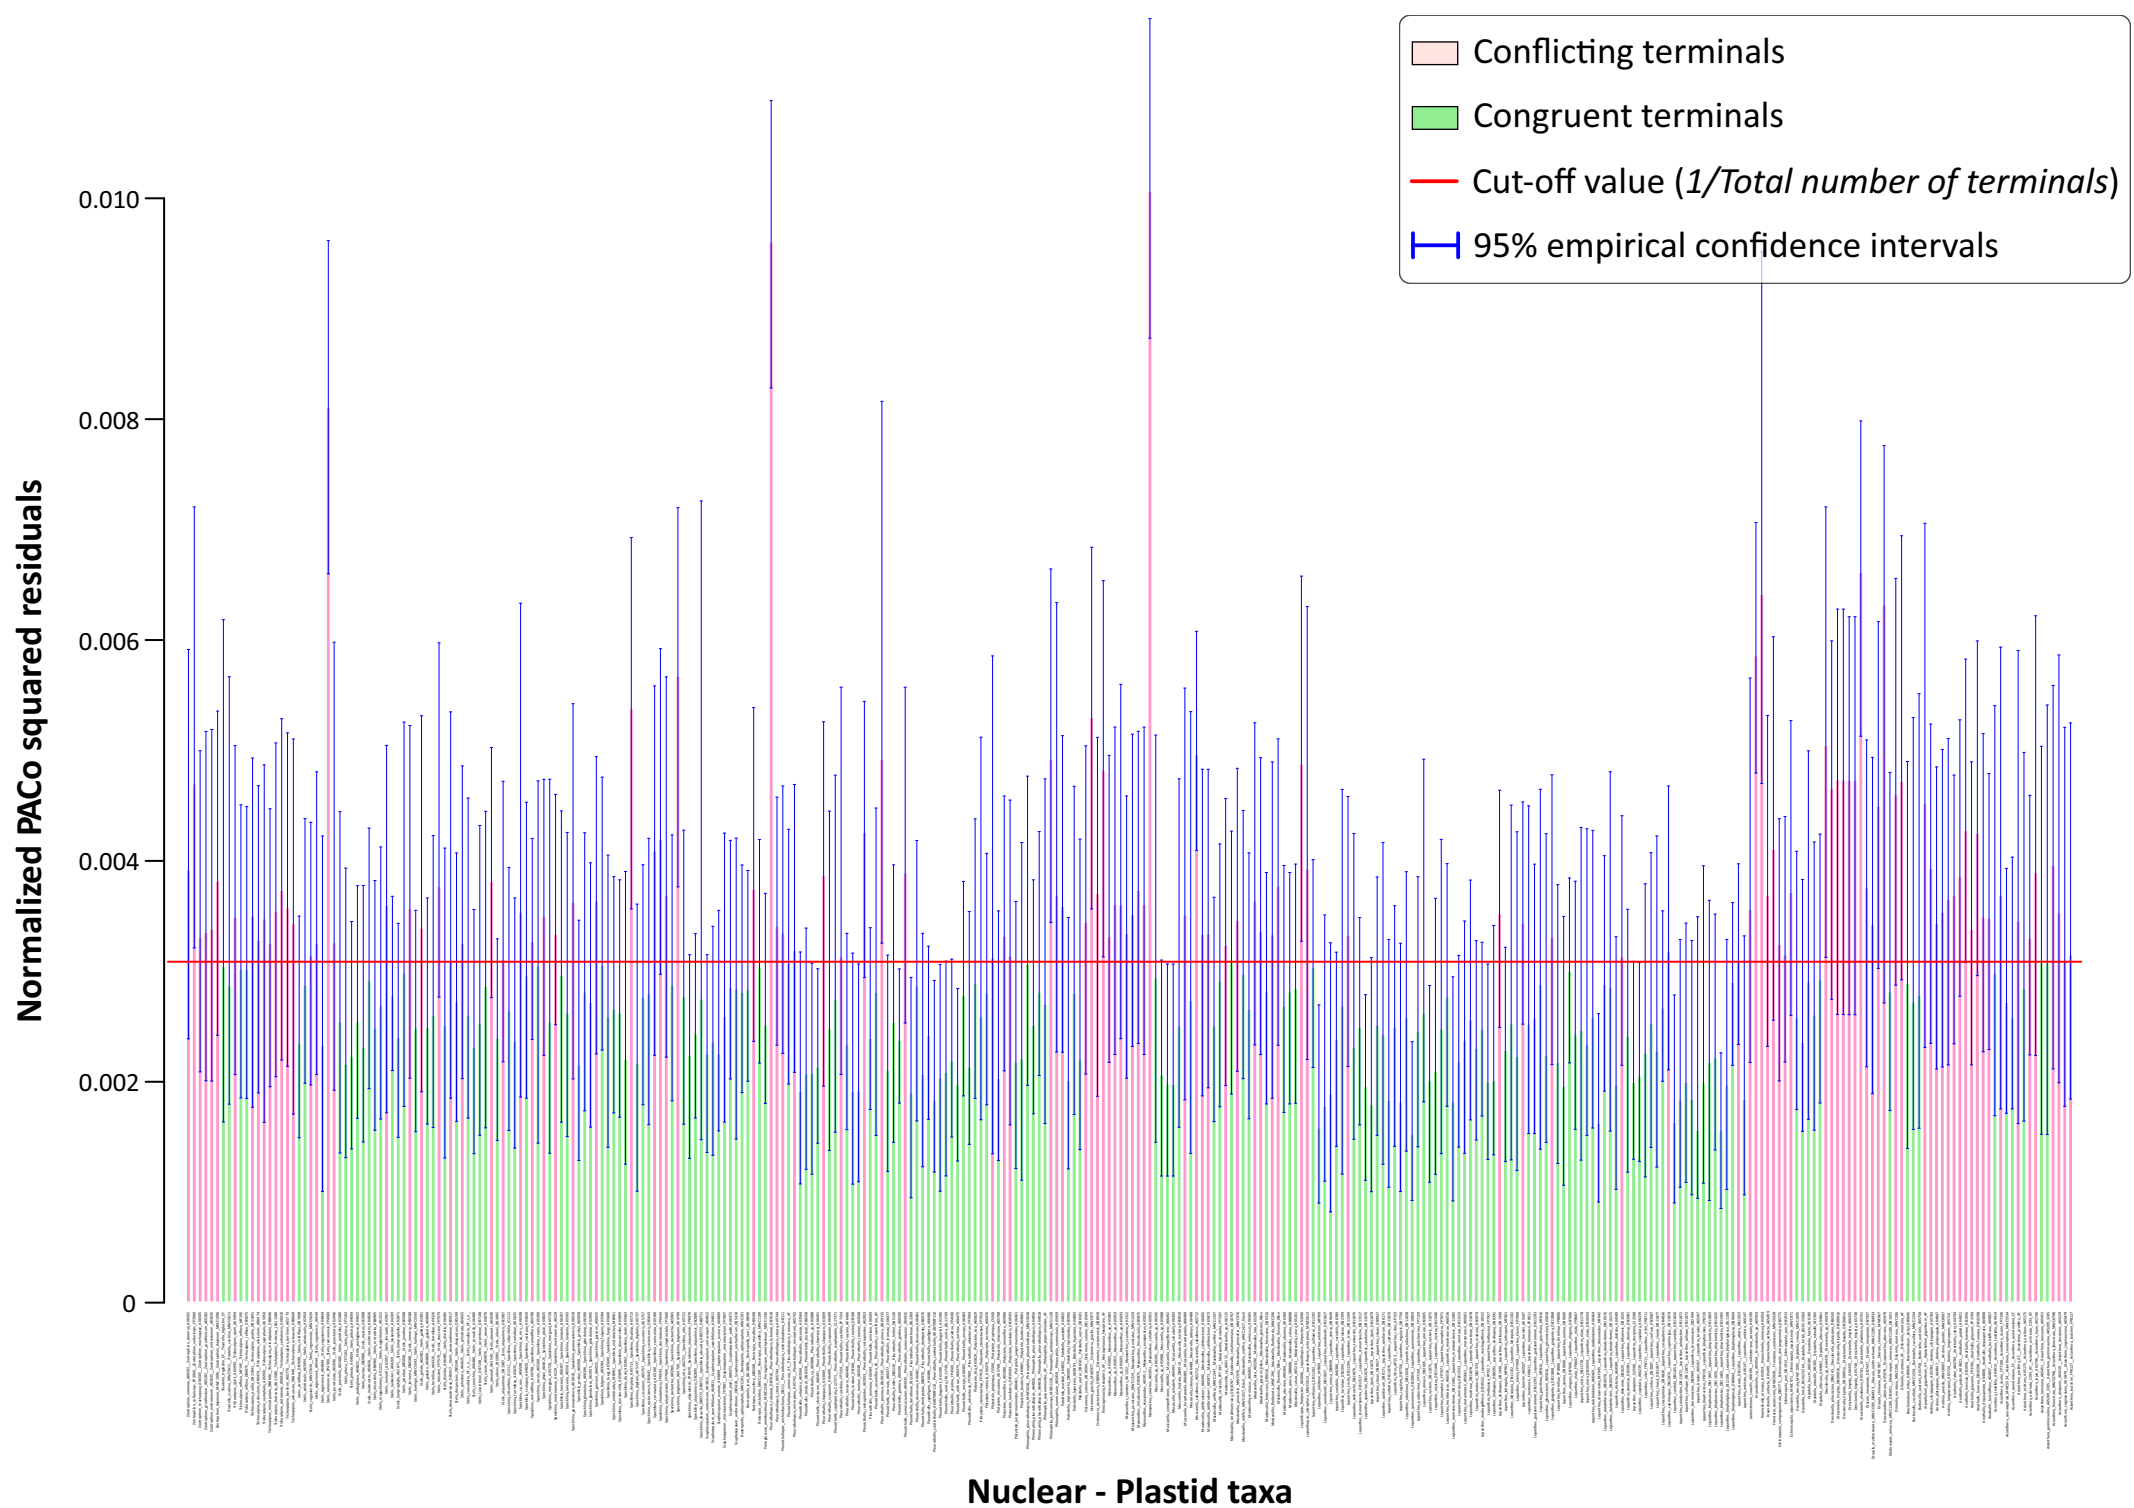

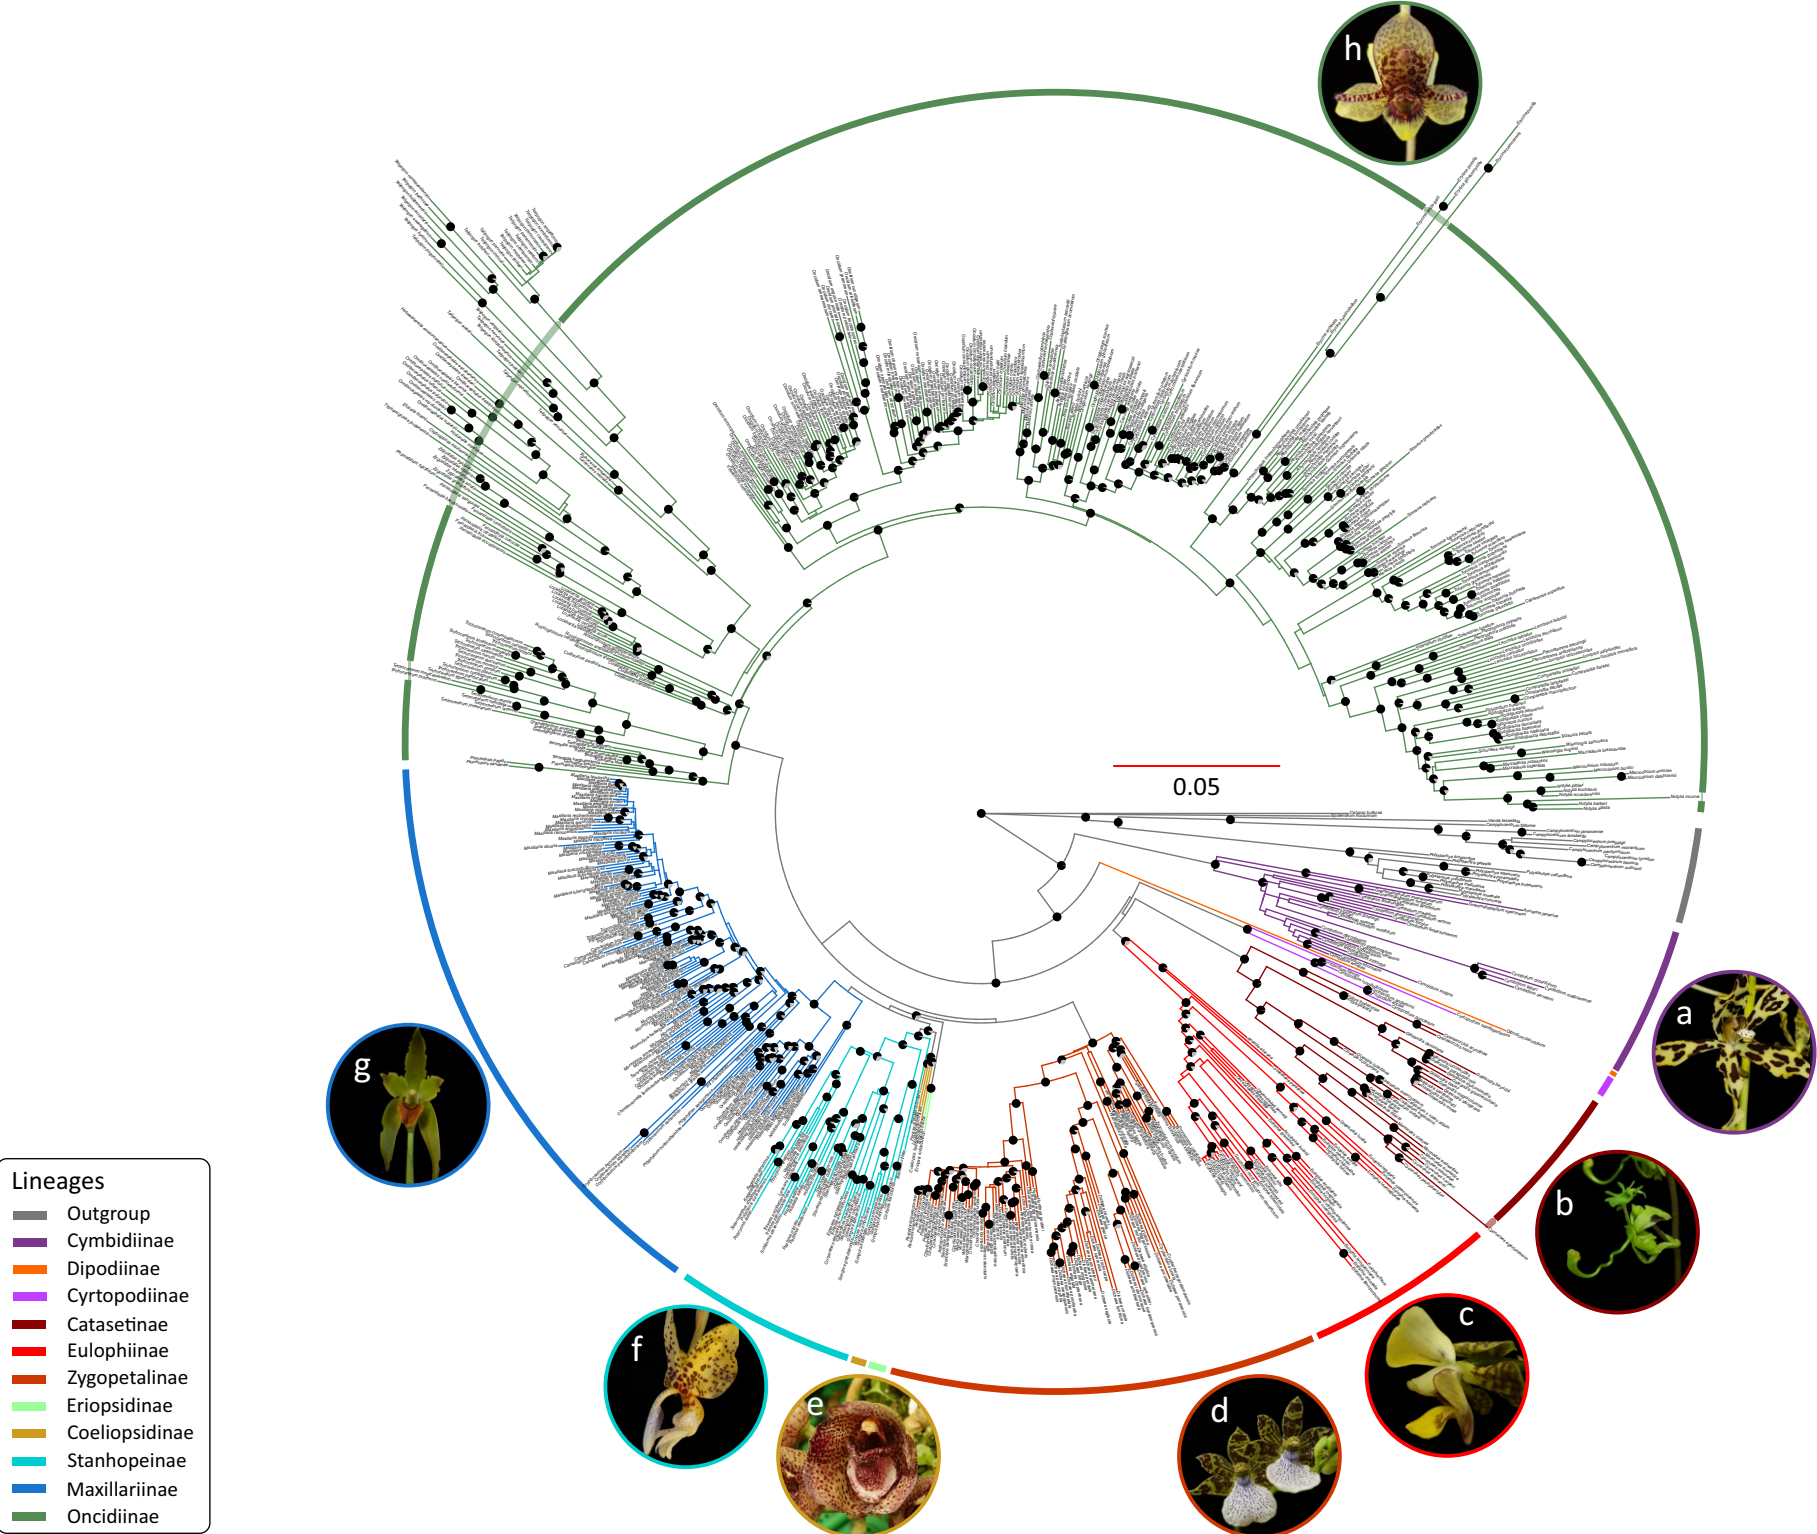

**Figure S5.** ML phylogeny of the orchid tribe Cymbidiieae inferred from concatenated, non-conflicting nuclear and plastid loci. LBS >75 are shown at nodes of the tree (black pie diagrams indicate LBS of 100). Photos: O. Pérez



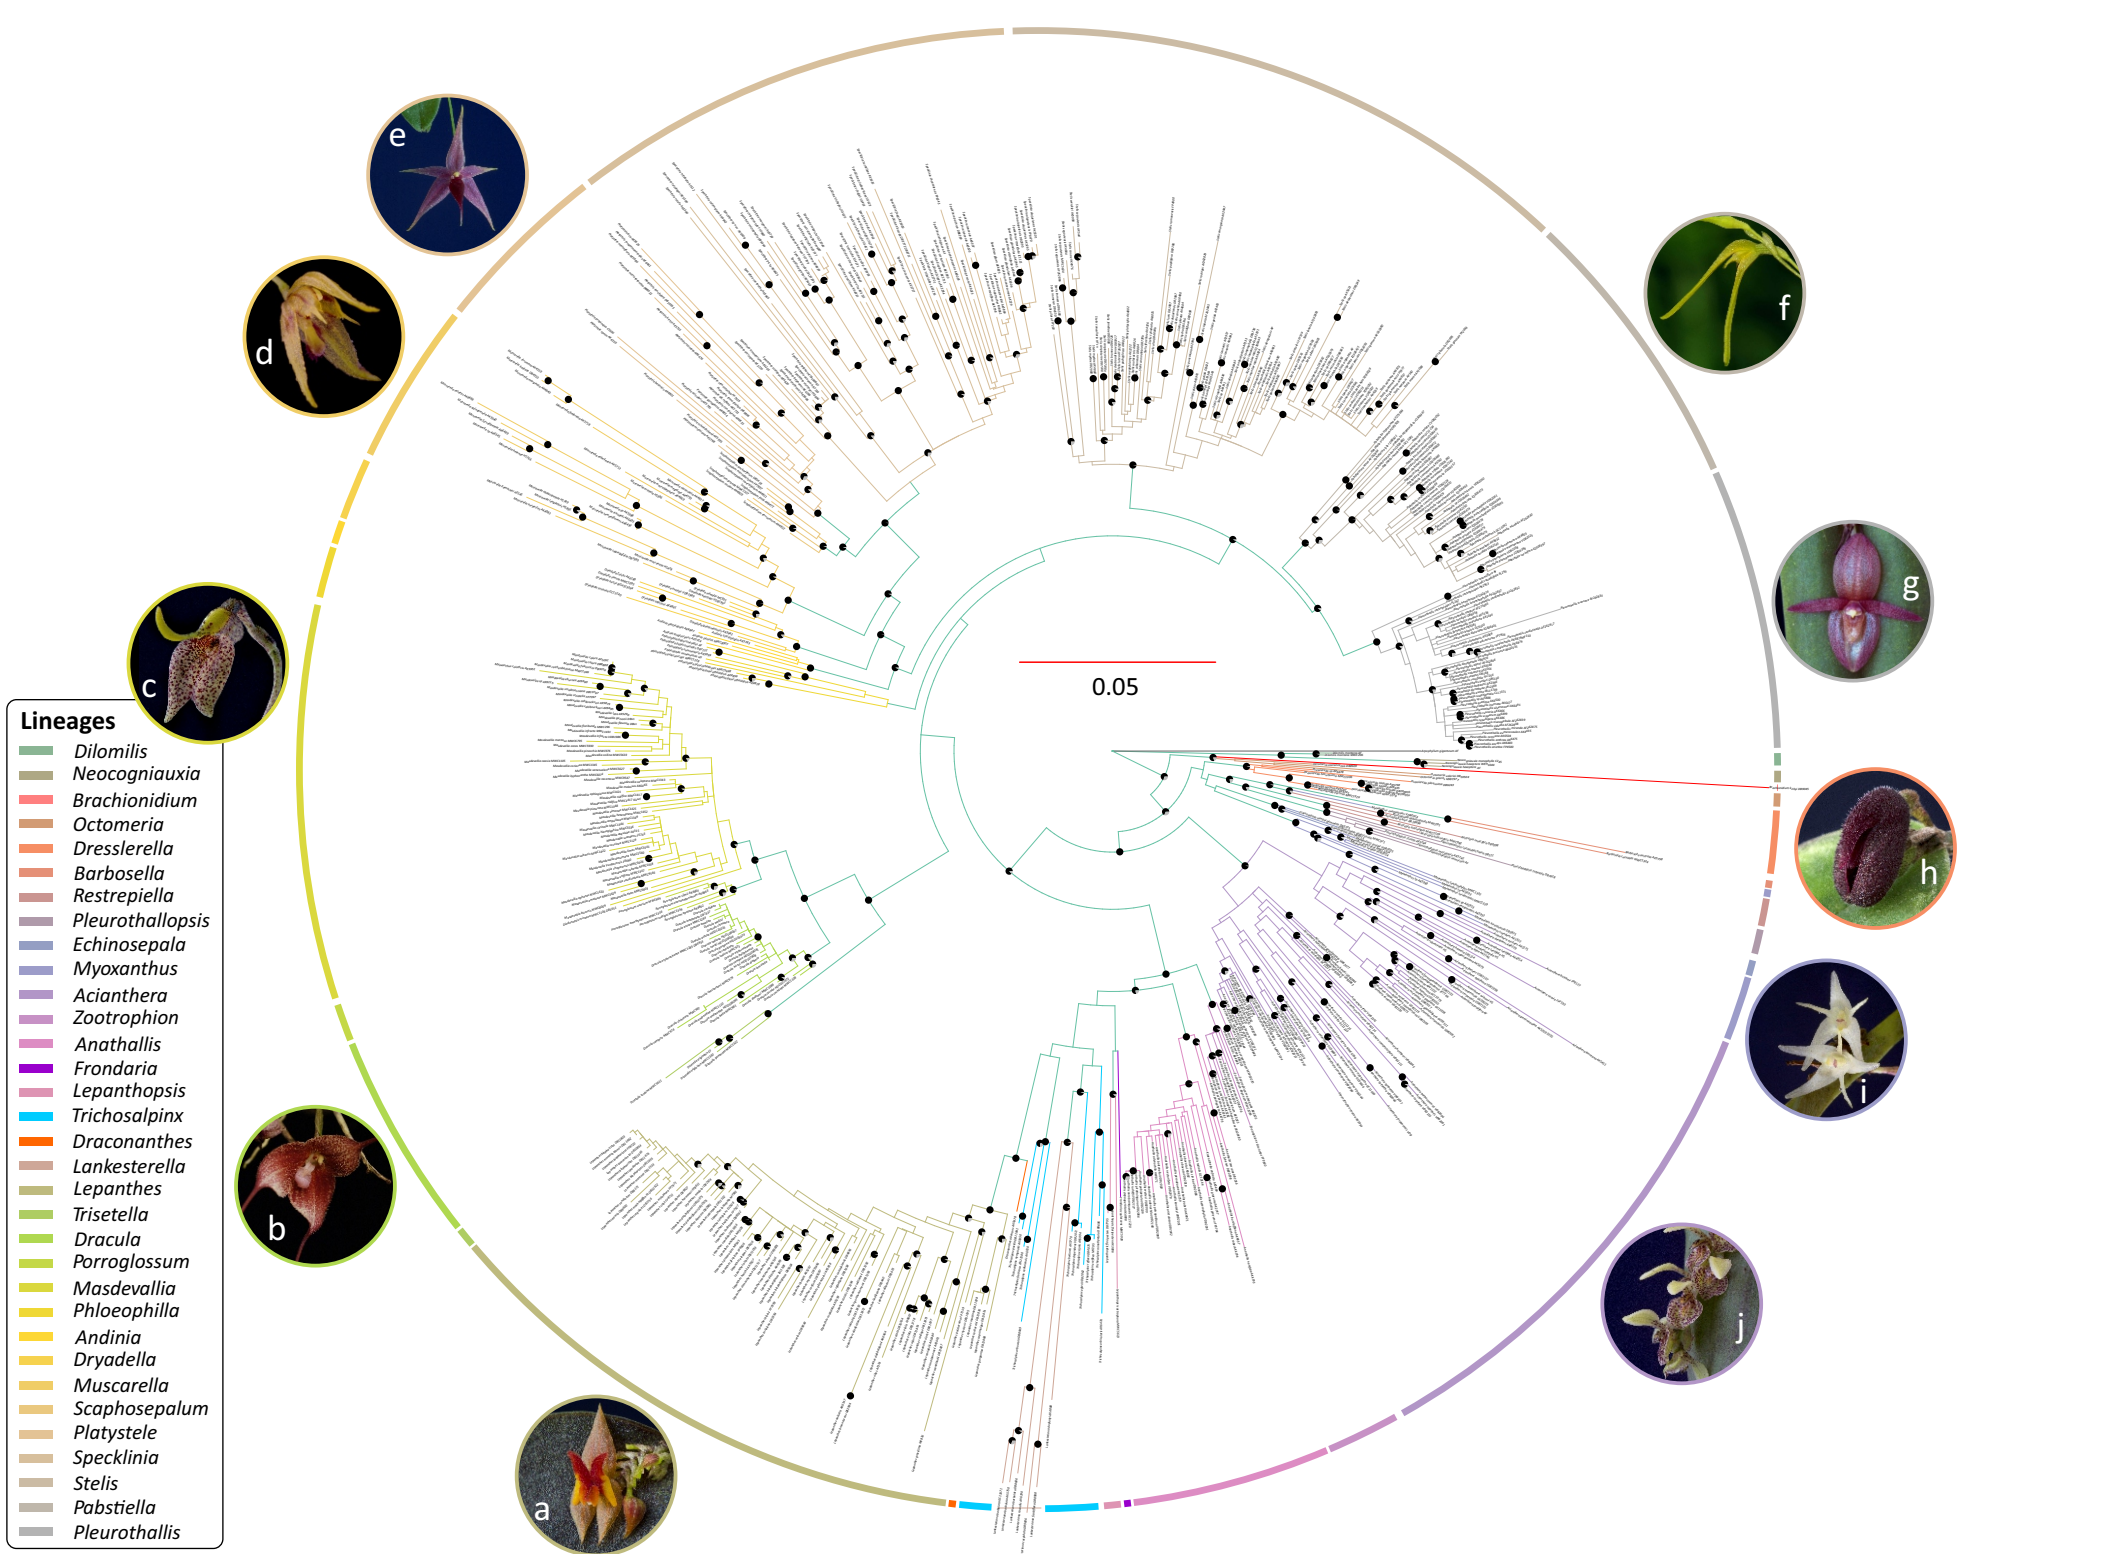

**Figure S6.** ML phylogeny of the orchid subtribe Pleurothallidinae inferred from concatenated, non-conflicting nuclear and plastid loci. LBS >75 are shown at nodes of the tree (black pie diagrams indicate LBS of 100). Photos: D. Bogarín, A. Karremans and O. Pérez

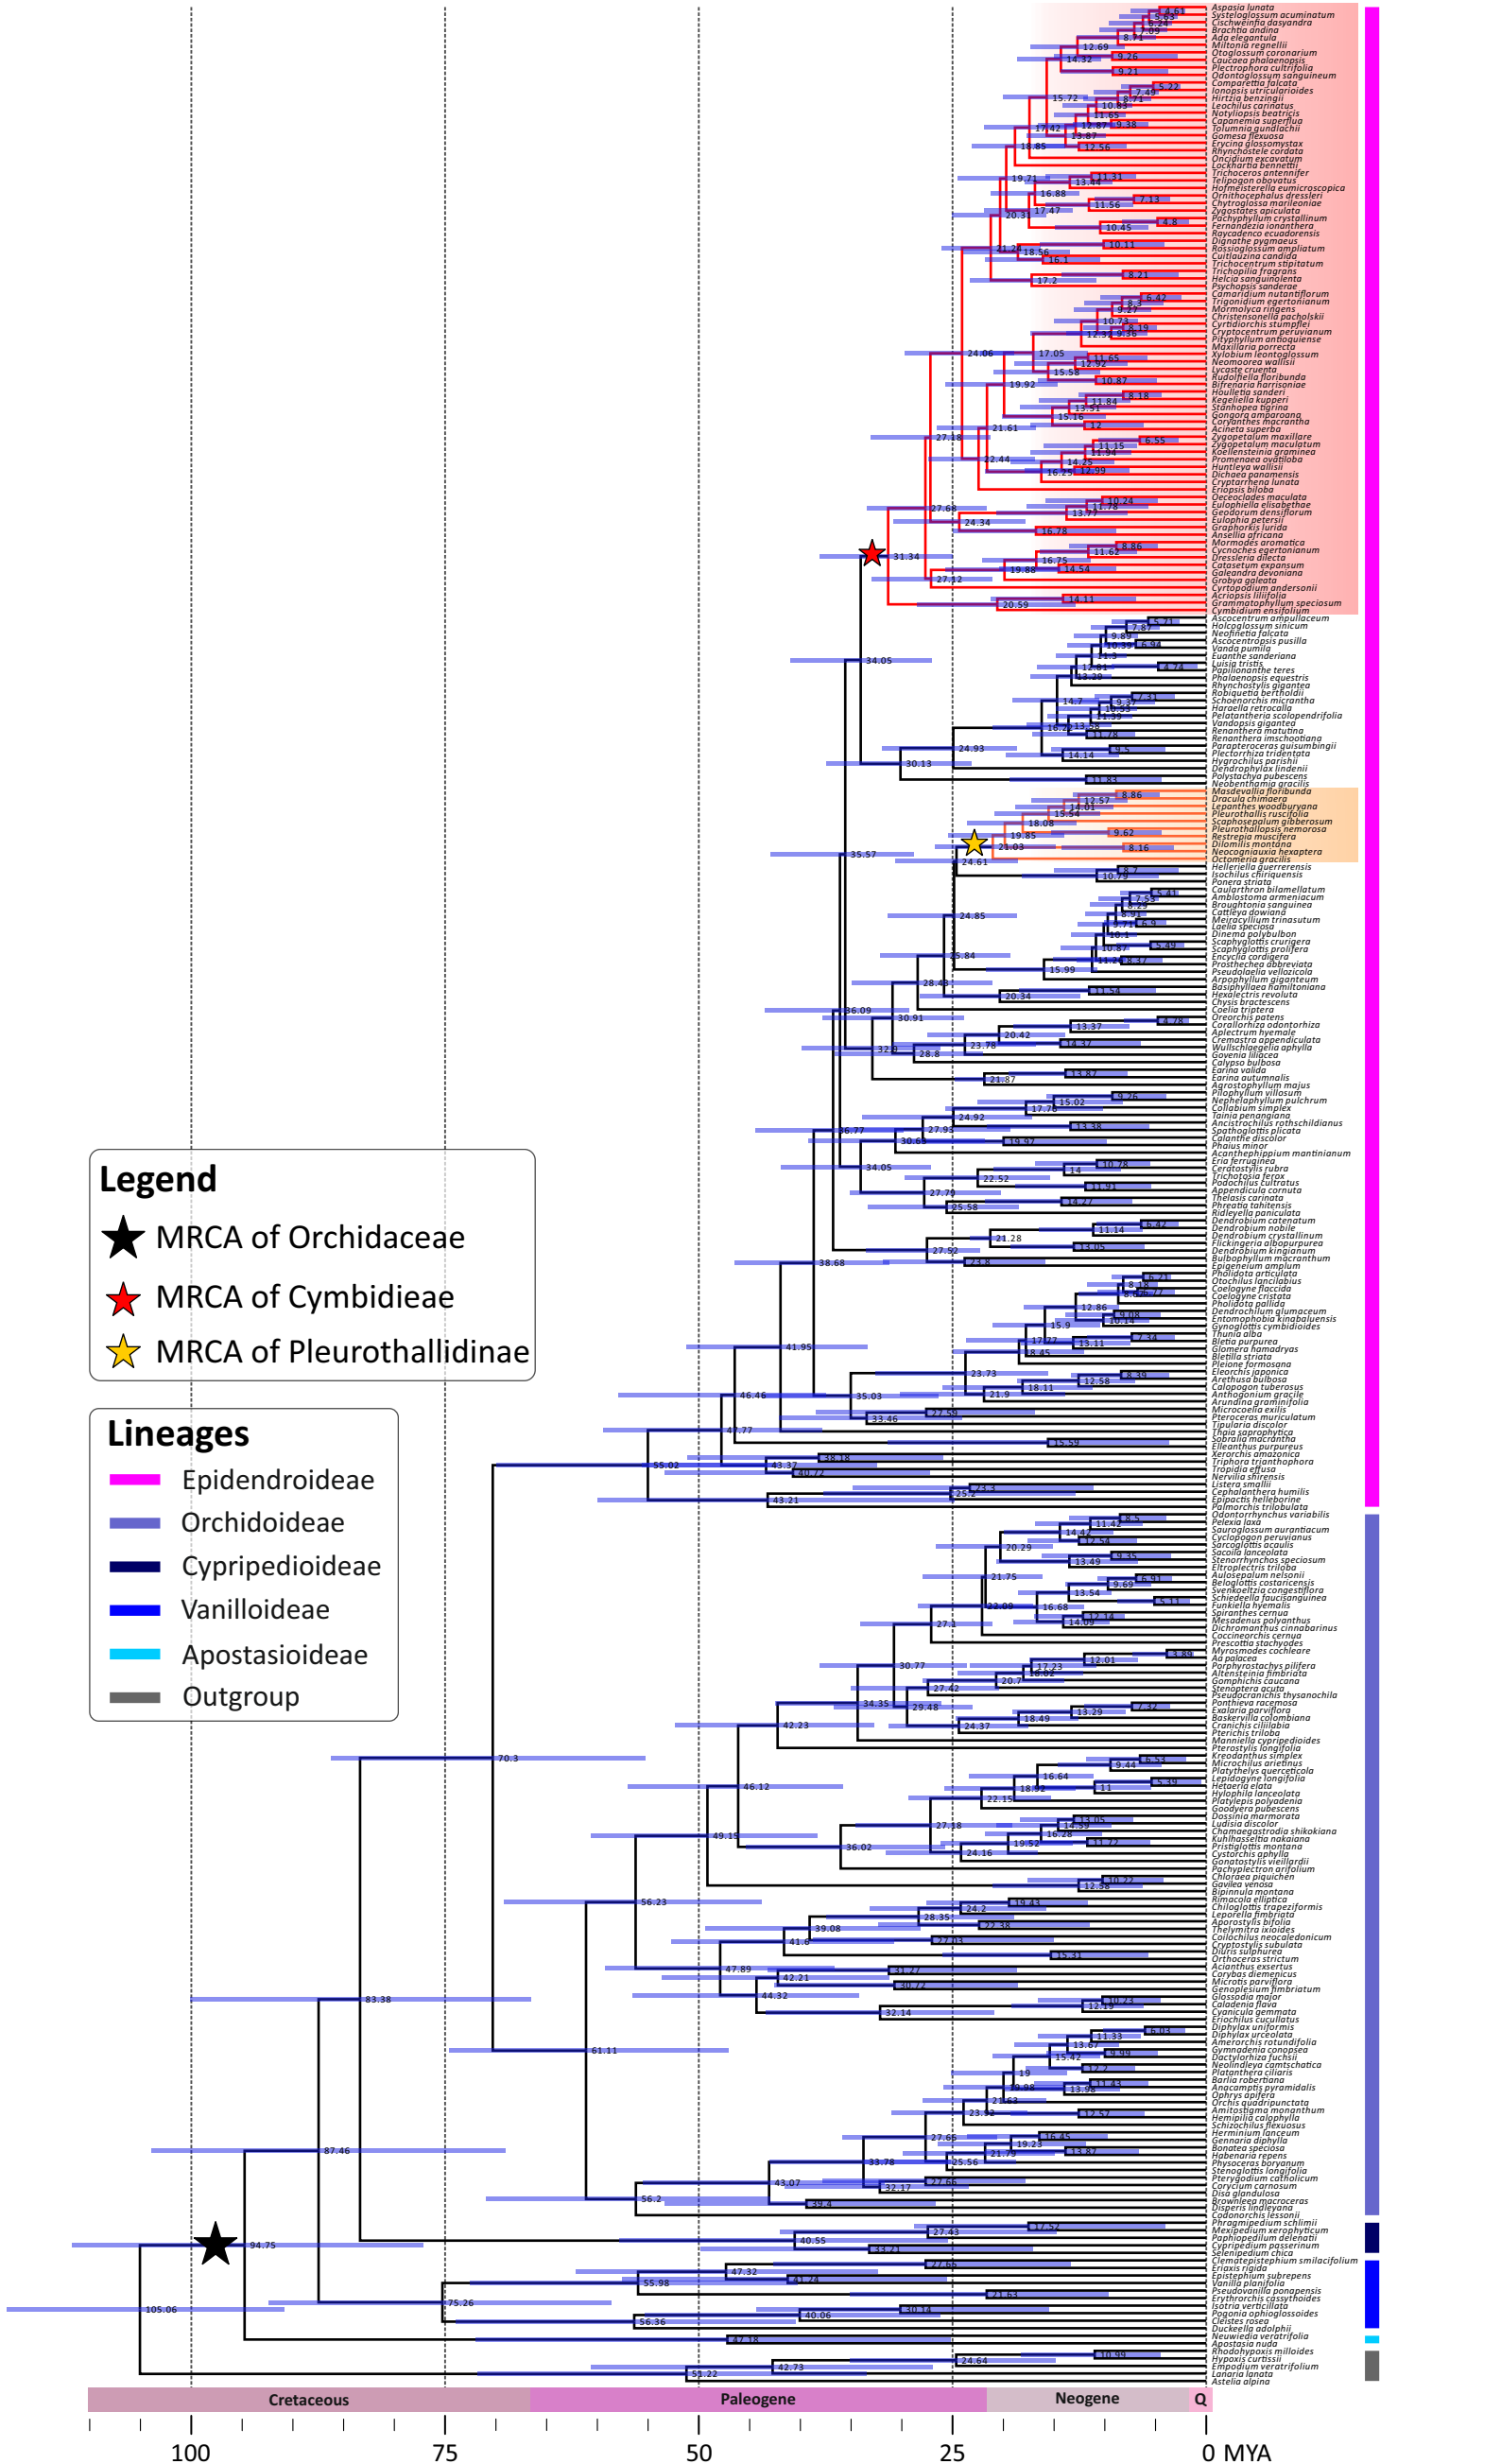

**Legend**

- ★ MRCA of Orchidaceae
- ★ MRCA of Cymbidieae
- ★ MRCA of Pleurothallidinae

**Lineages**

- █ Epidendroideae
- █ Orchidoideae
- █ Cypripedioideae
- █ Vanilloideae
- █ Apostasioideae
- █ Outgroup

**Figure S7.** Chronogram of the Orchidaceae obtained a lognormal relaxed clock model

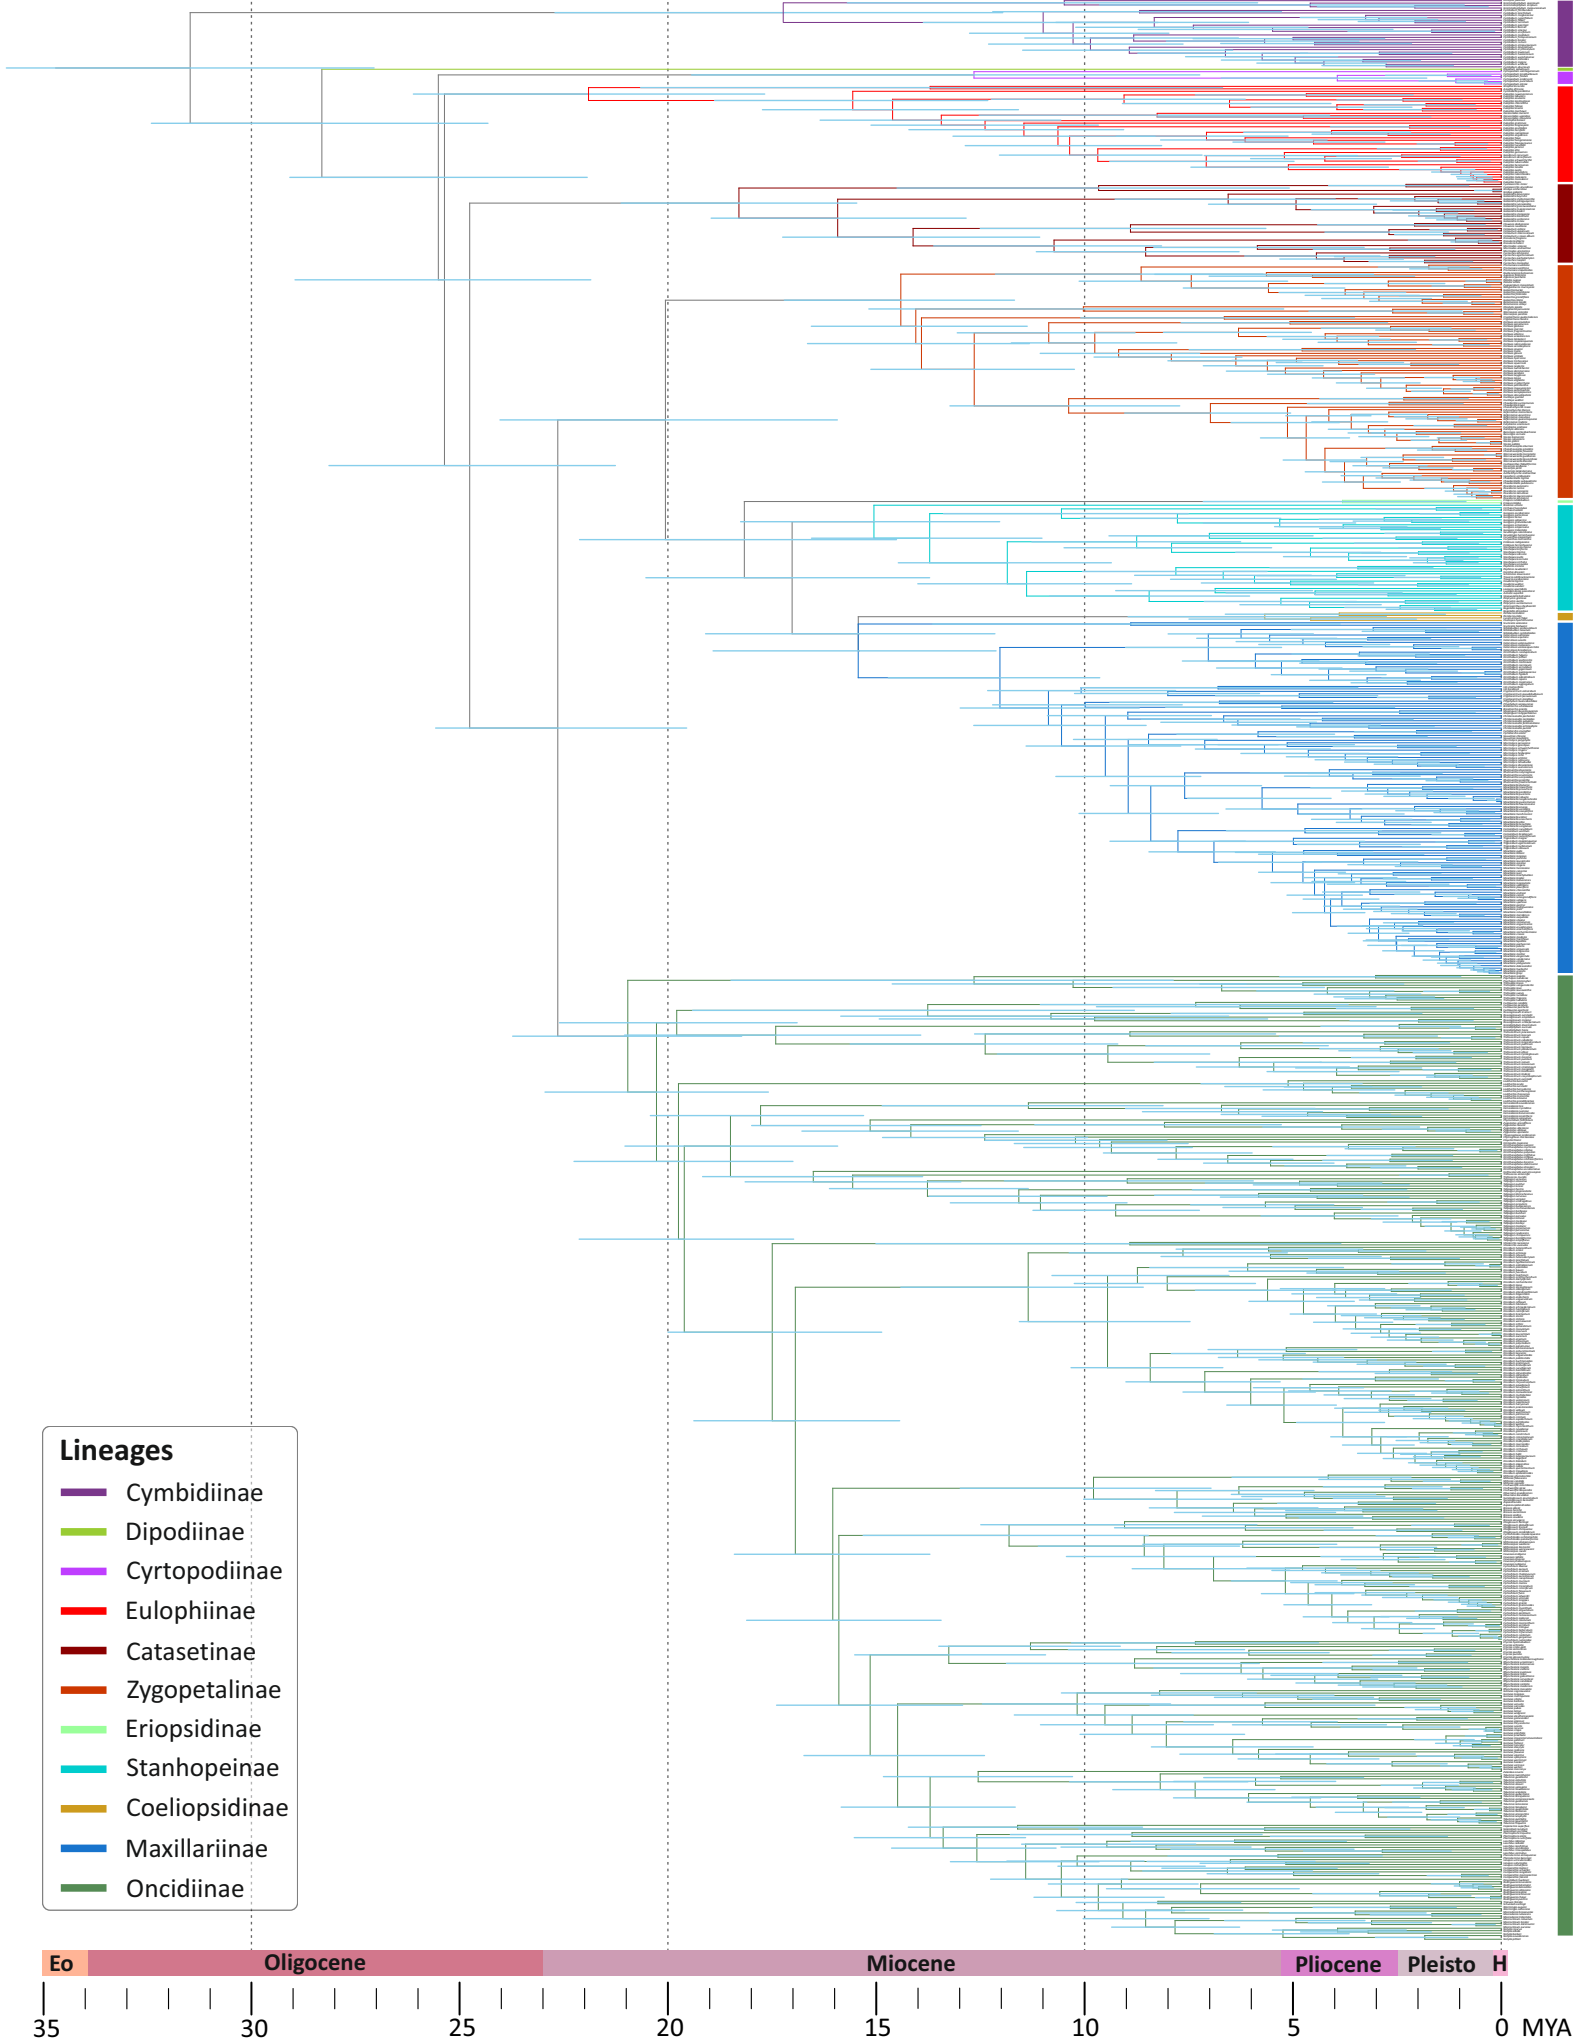

**Lineages**

- Cymbidiinae
- Dipodiinae
- Cyrtopodiinae
- Eulophiinae
- Catasetinae
- Zygopetalinae
- Eriopsidinae
- Stanhopeinae
- Coeliopsidinae
- Maxillariinae
- Oncidiinae

Eo
Oligocene
Miocene
Pliocene
Pleisto
H

35      30      25      20      15      10      5      0 MYA

**Figure S8.** Chronogram of the Cymbidieae obtained under a lognormal relaxed clock model

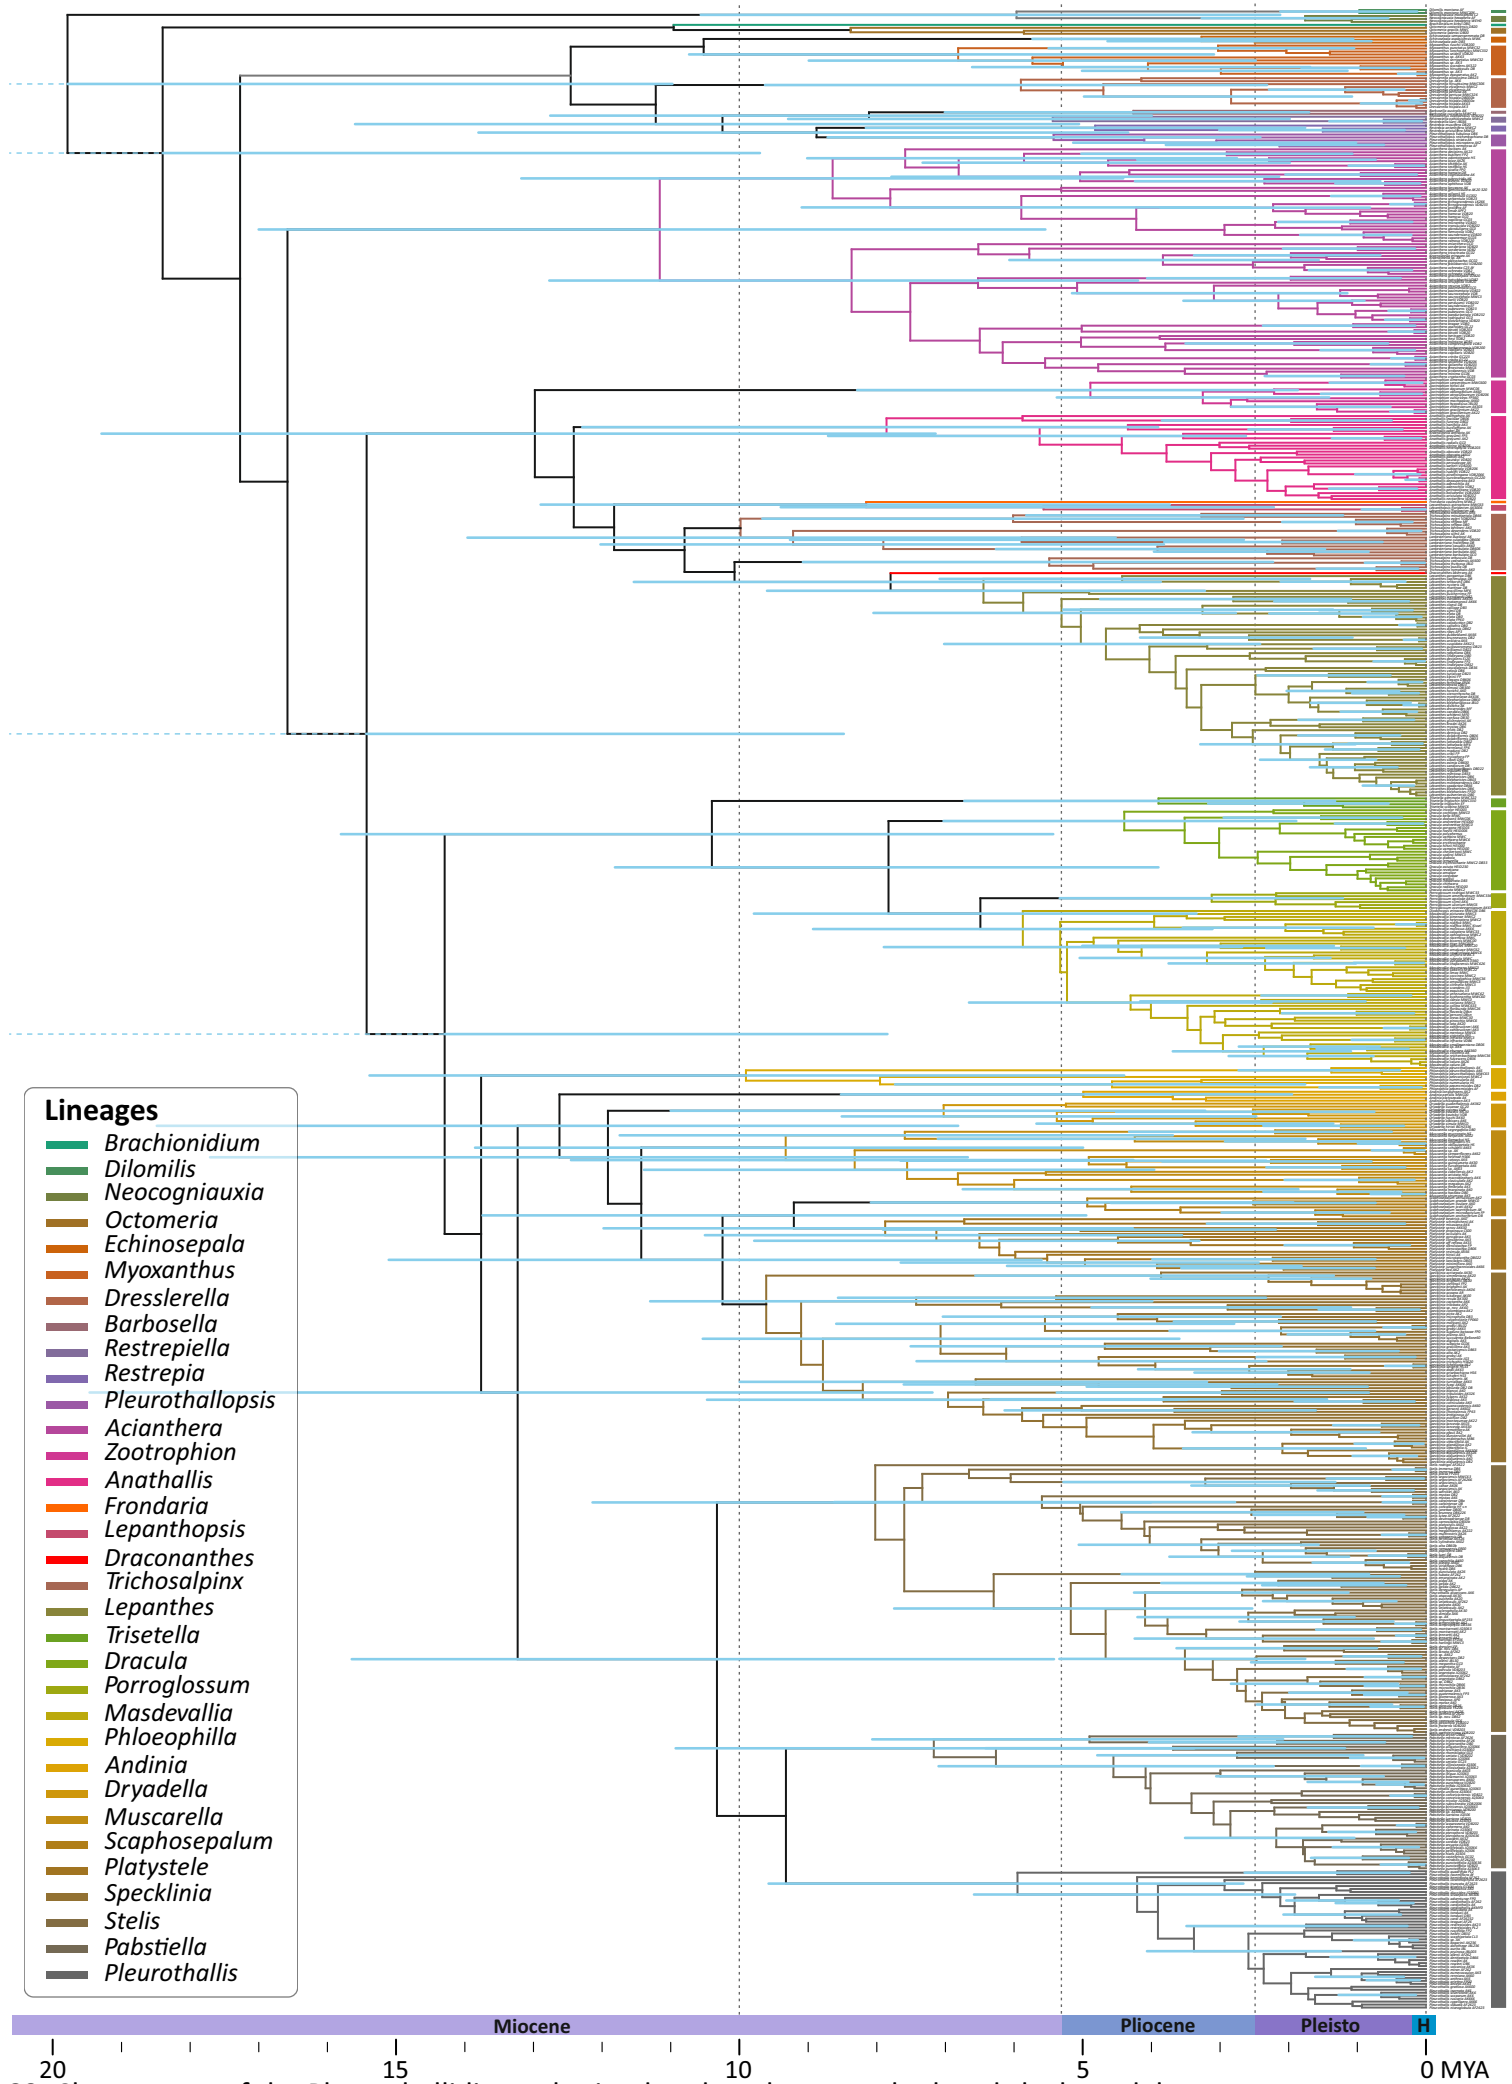

**Figure S9.** Chronogram of the Pleurothallidinae obtained under a lognormal relaxed clock model

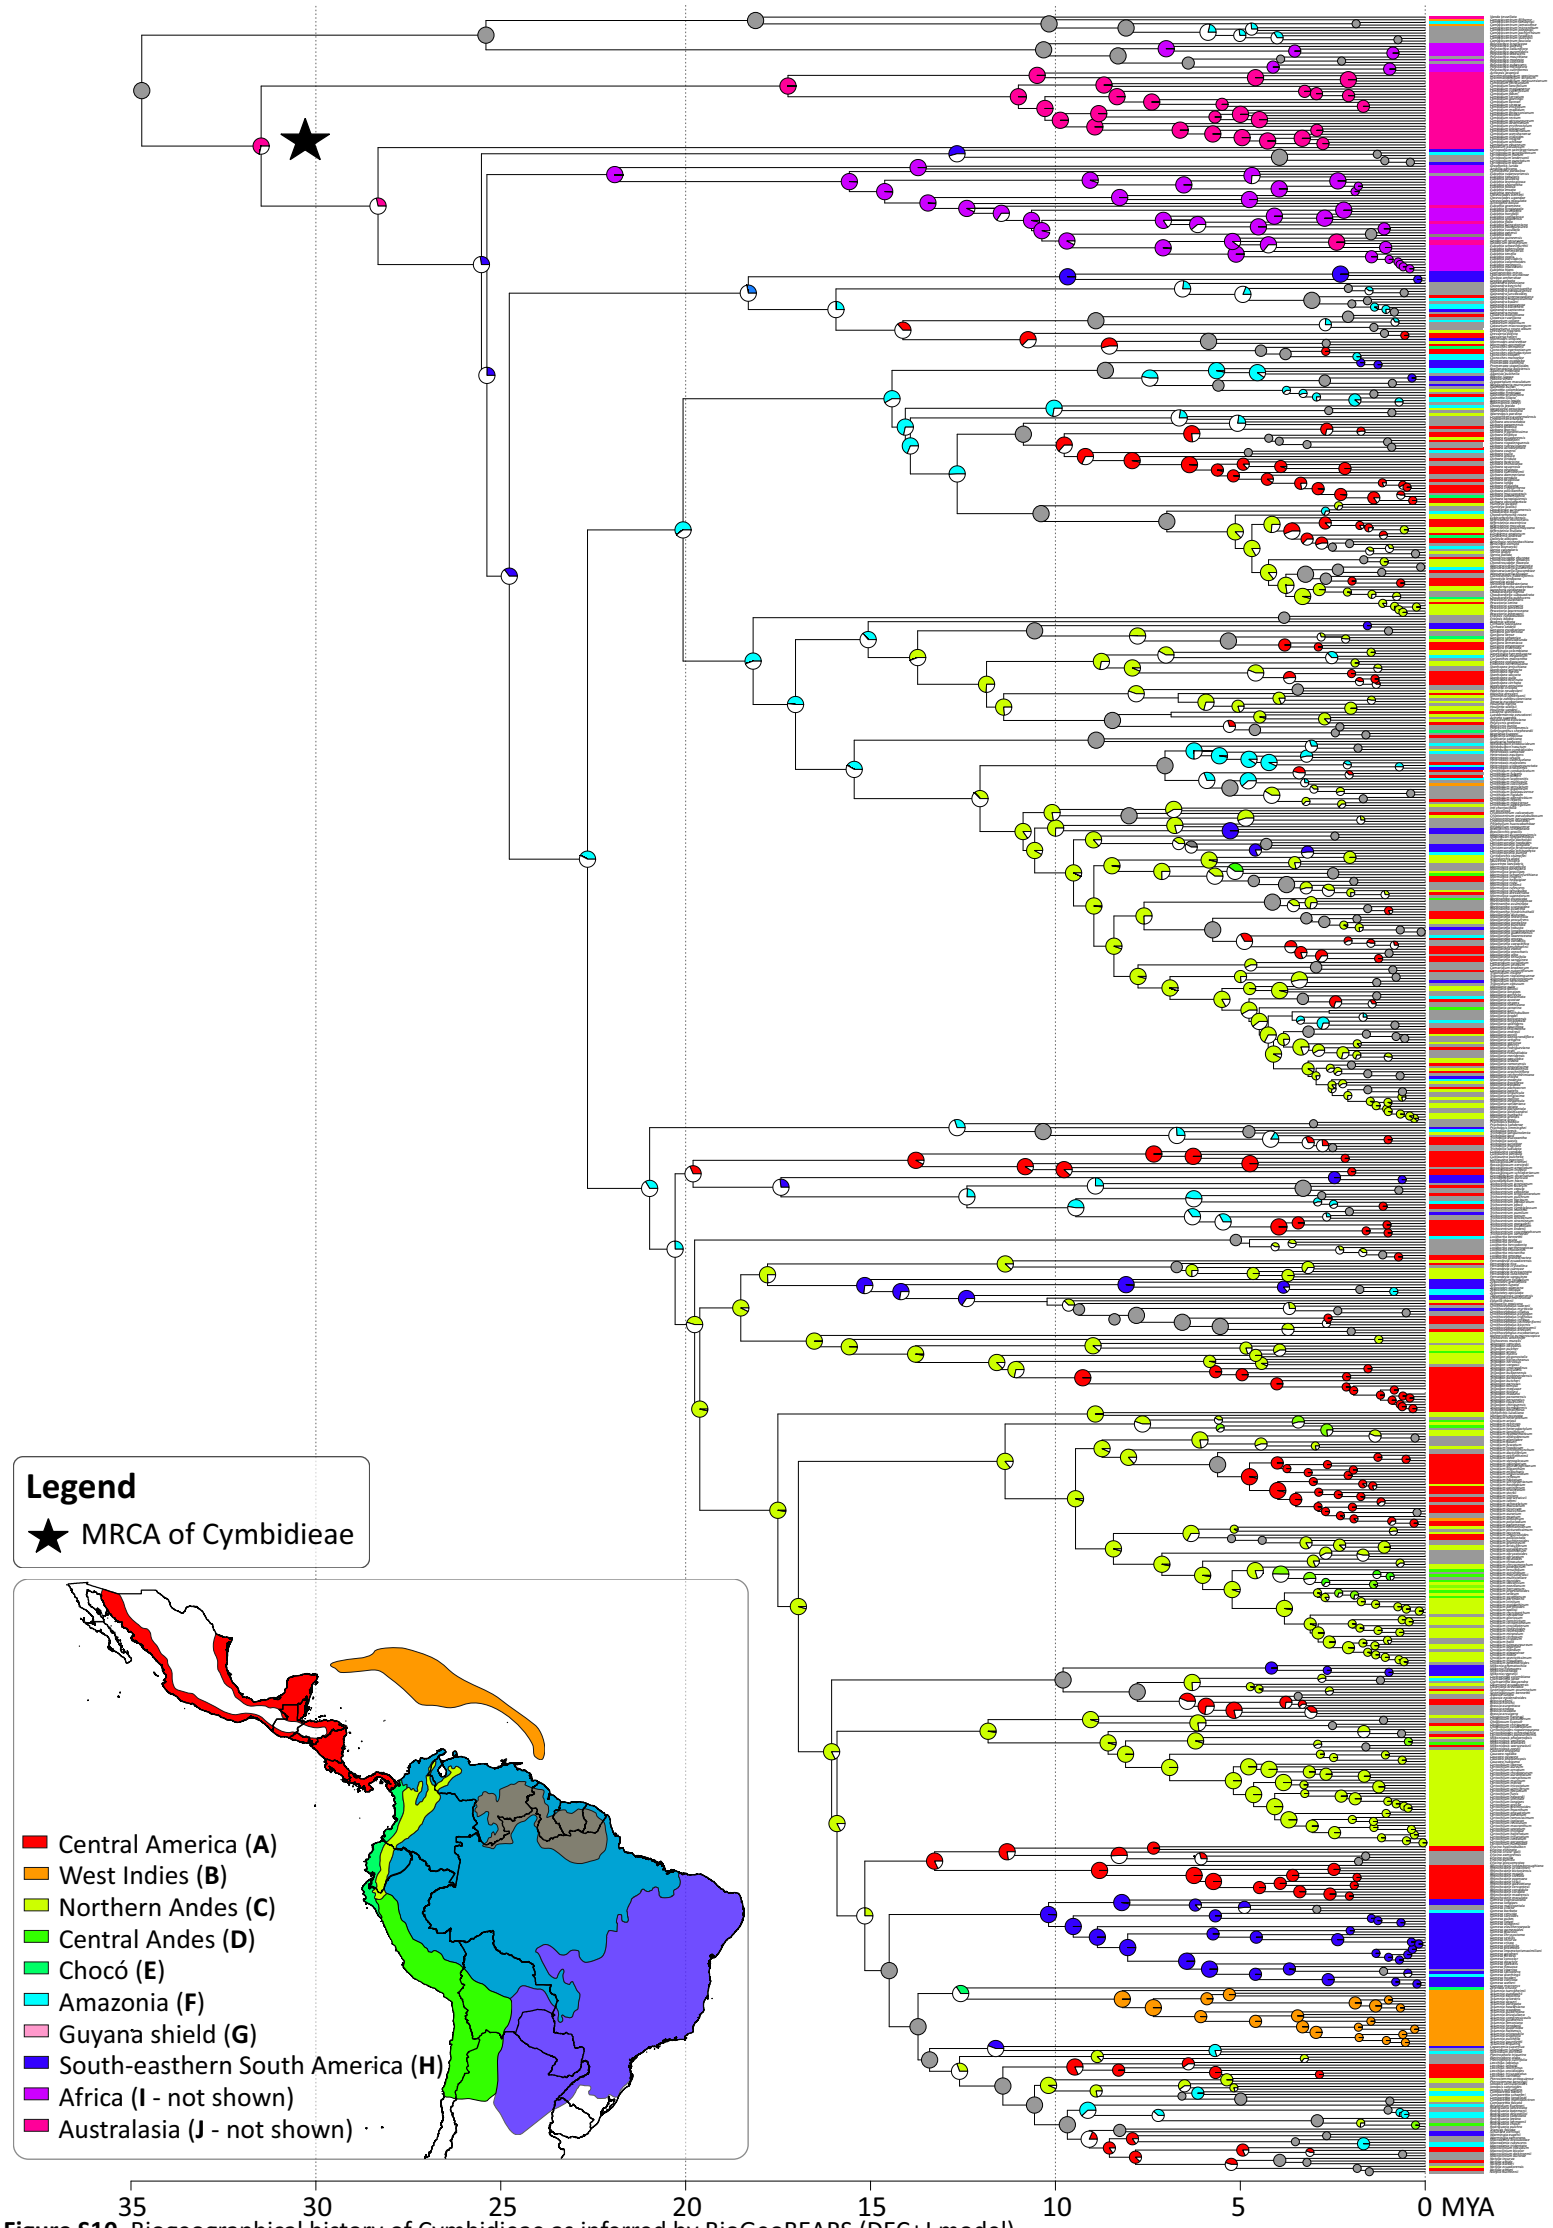

**Figure S10.** Biogeographical history of Cymbidiaceae as inferred by BioGeoBEARS (DEC+J model)



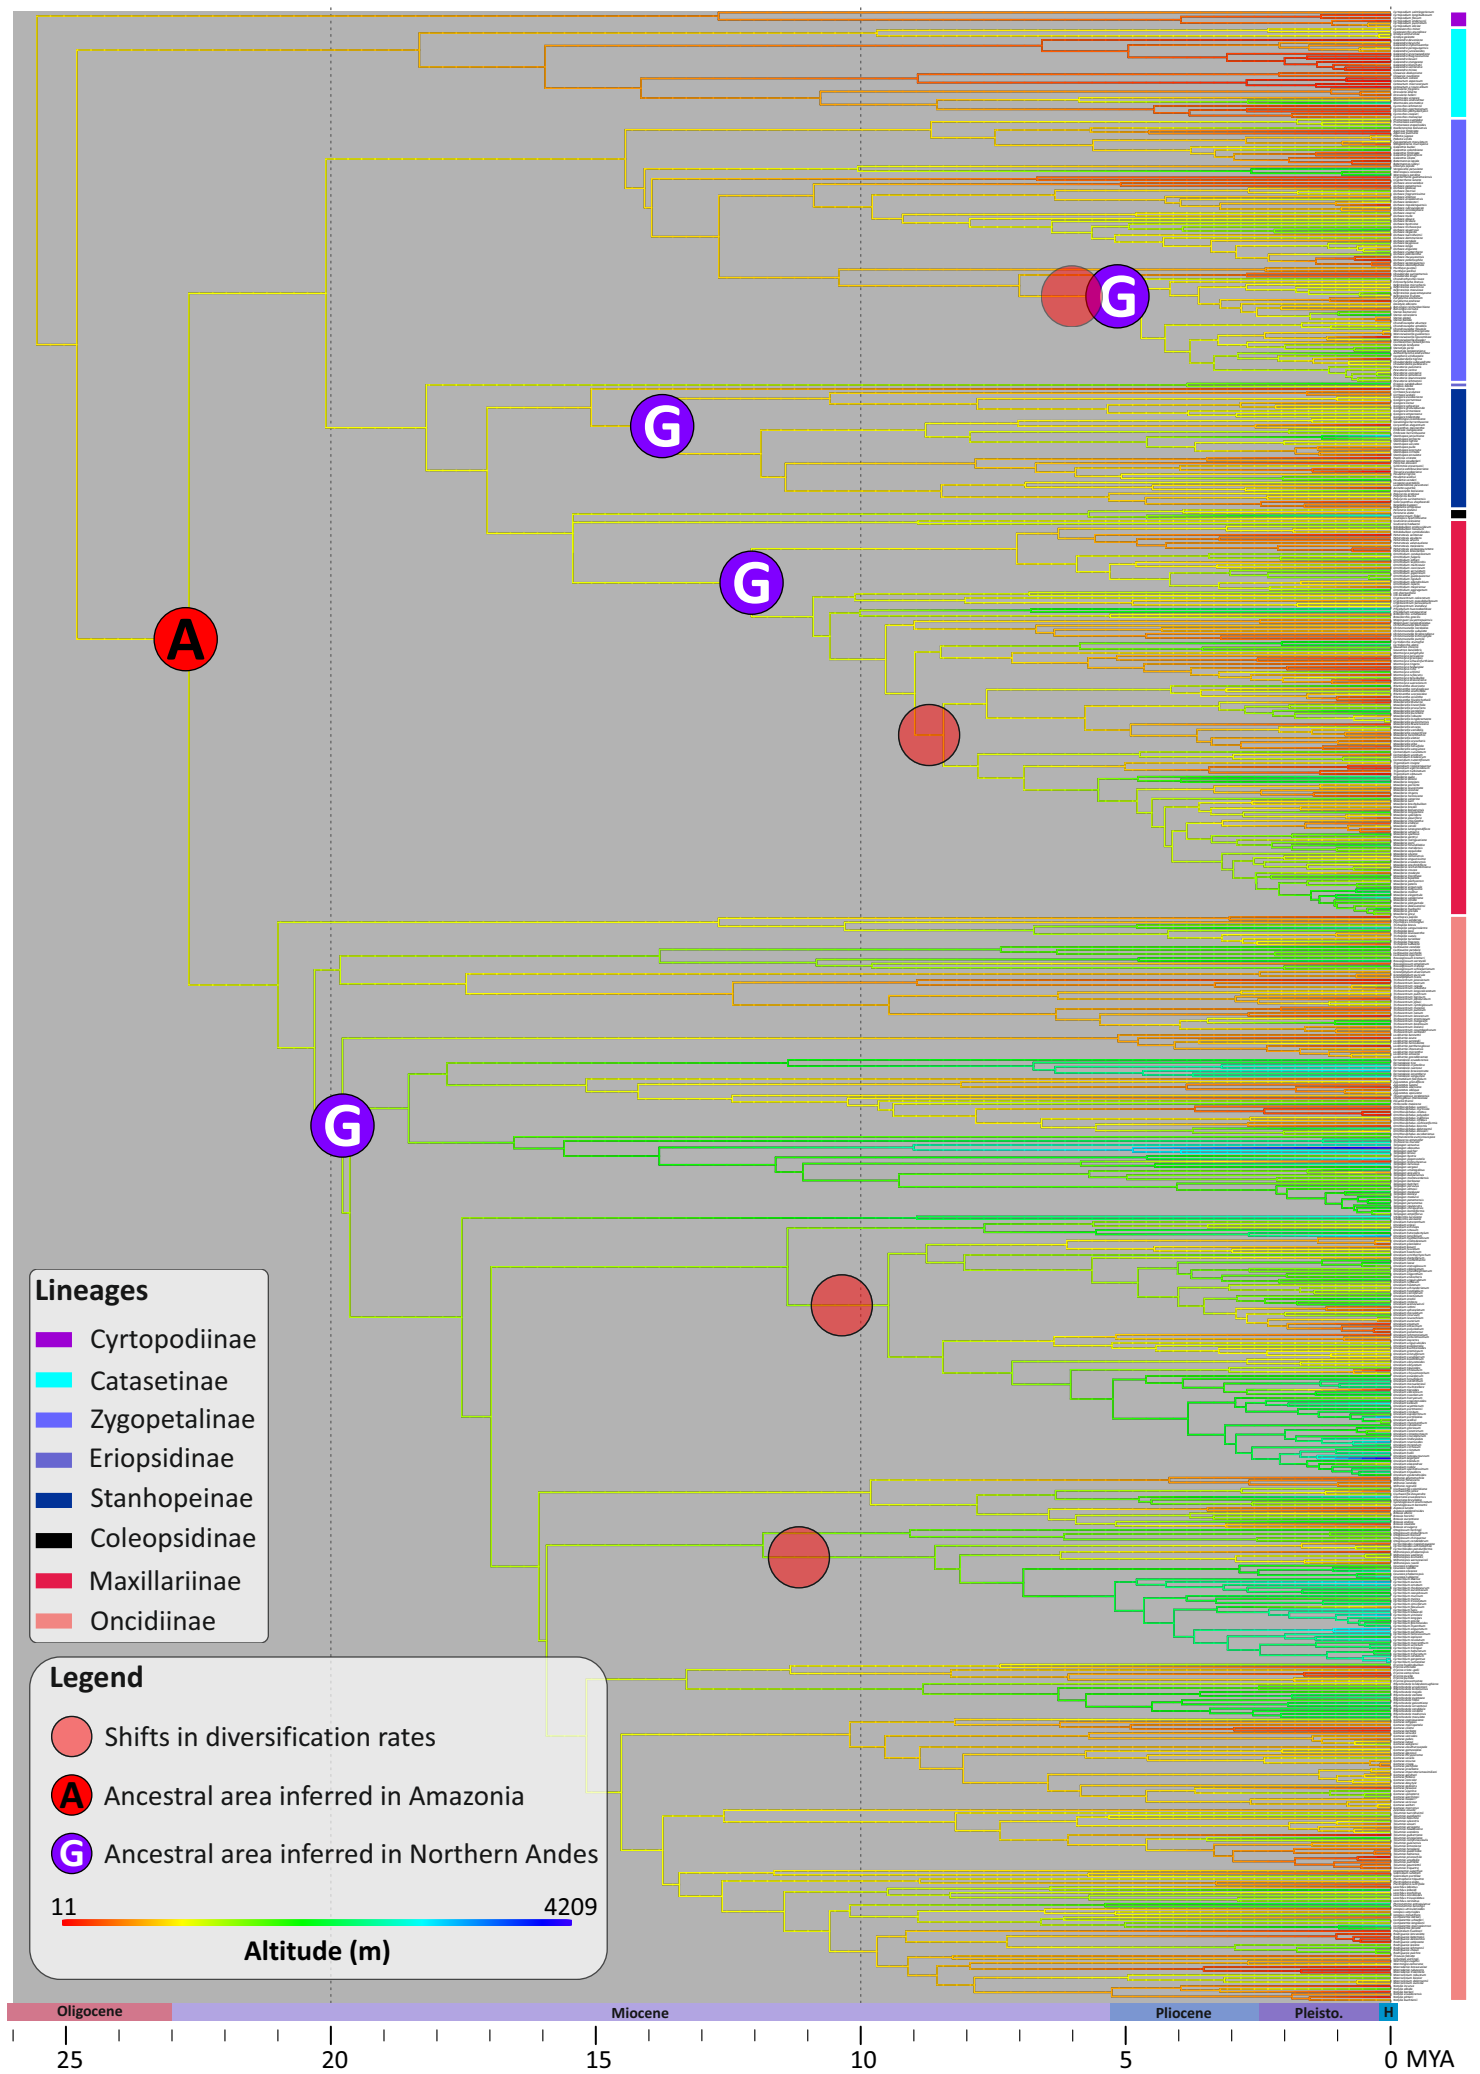

**Figure S11.** Ancestral character reconstruction of altitude as a continuous character in Cymbidiinae

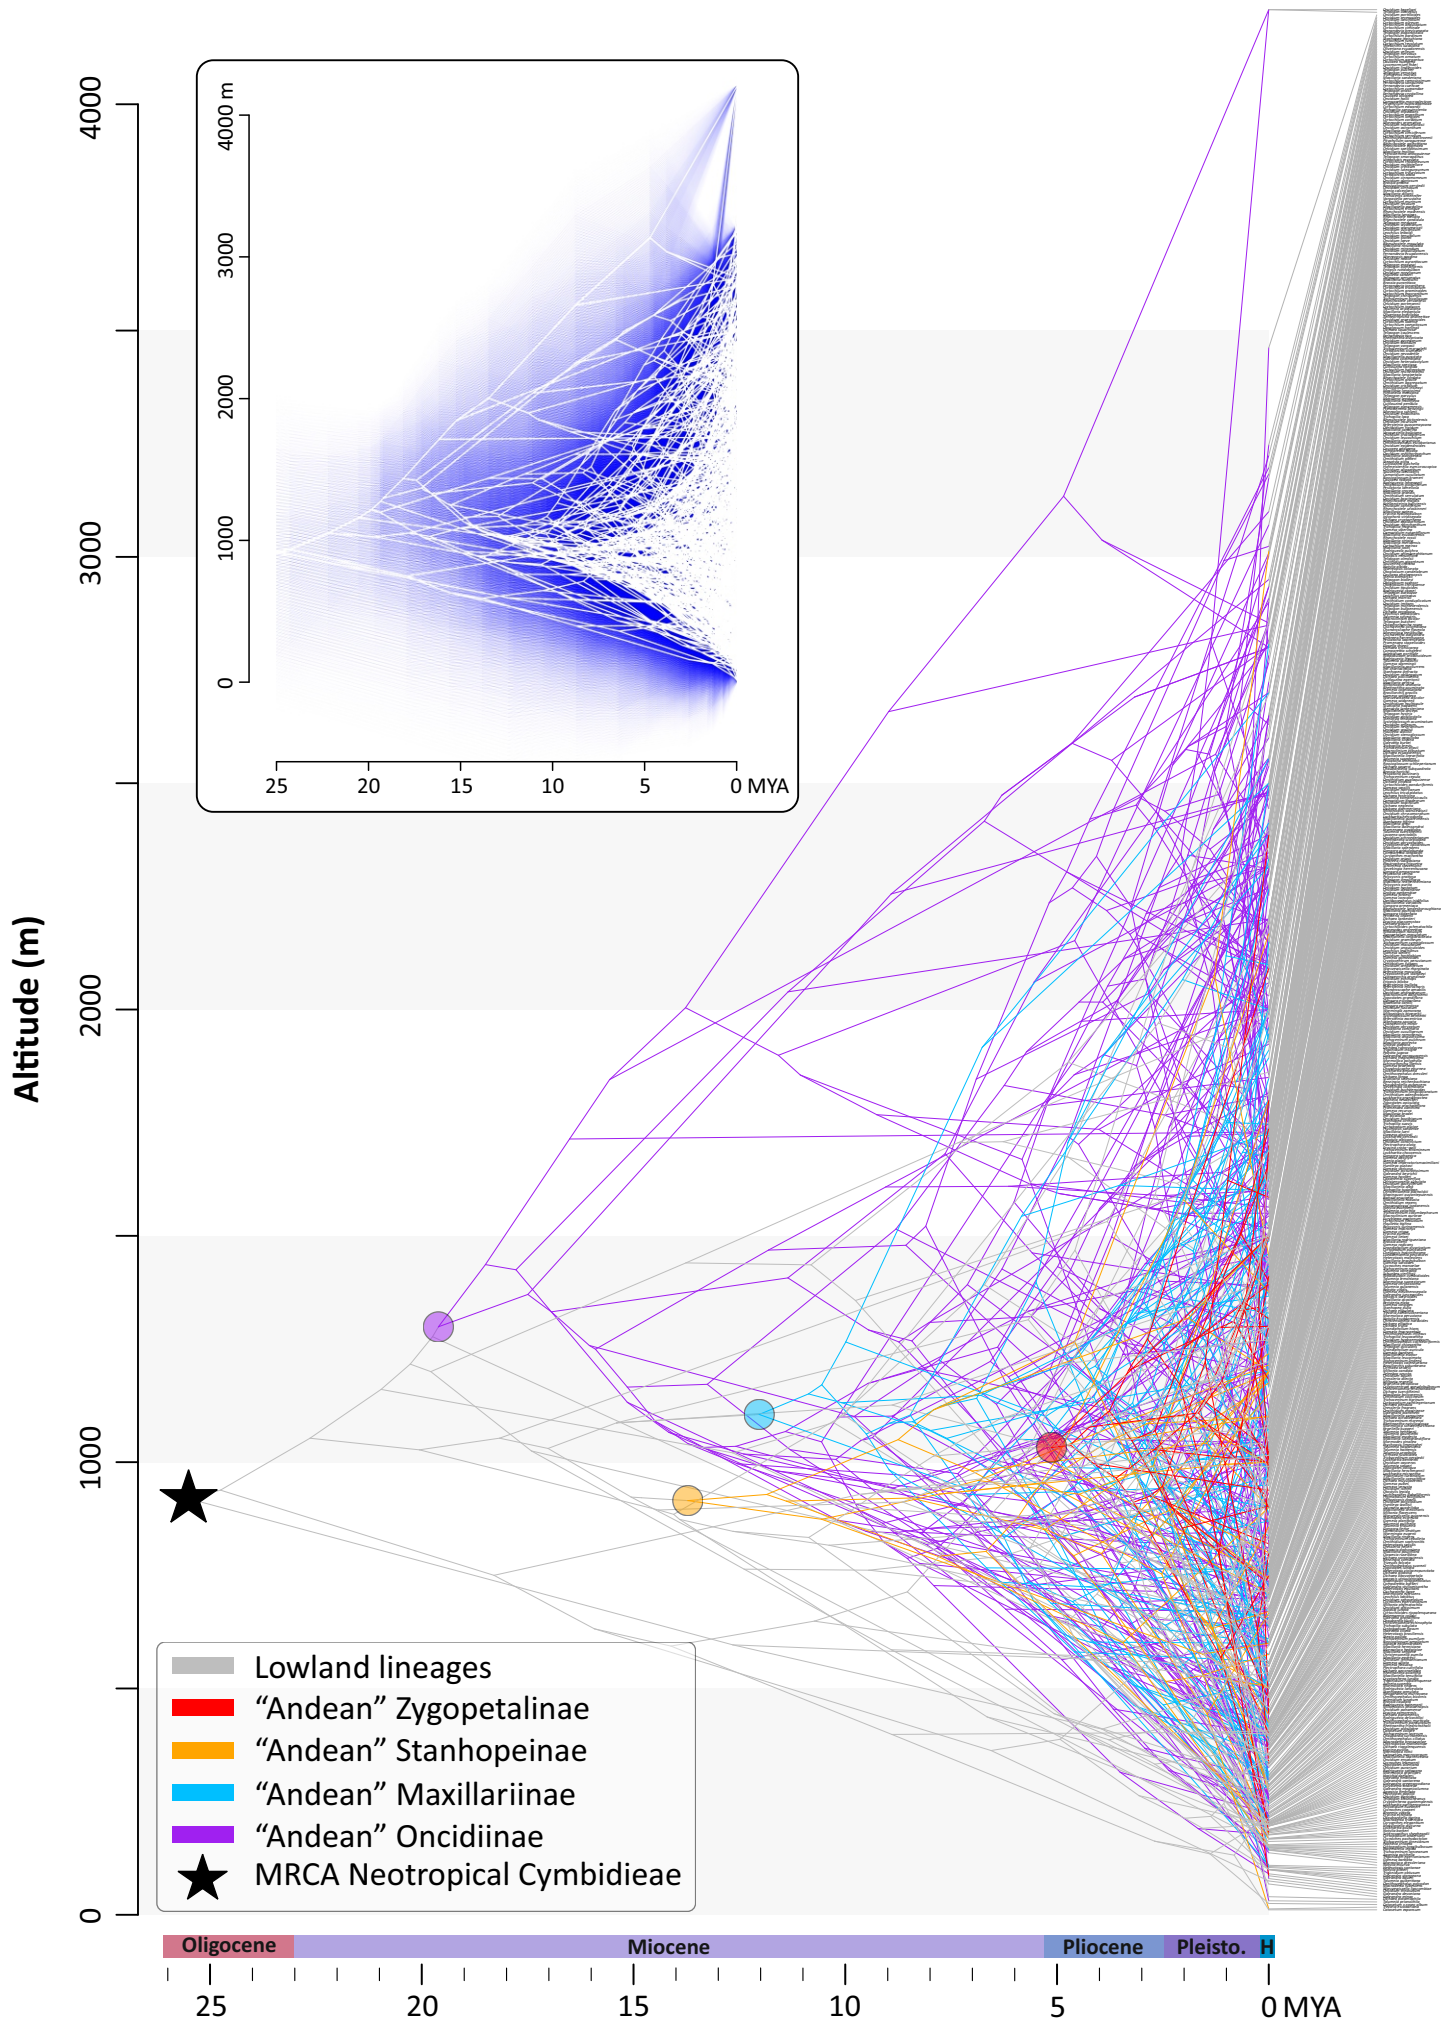

**Figure S12.** Traitgram of altitude change as a function of time in Cymbidieae

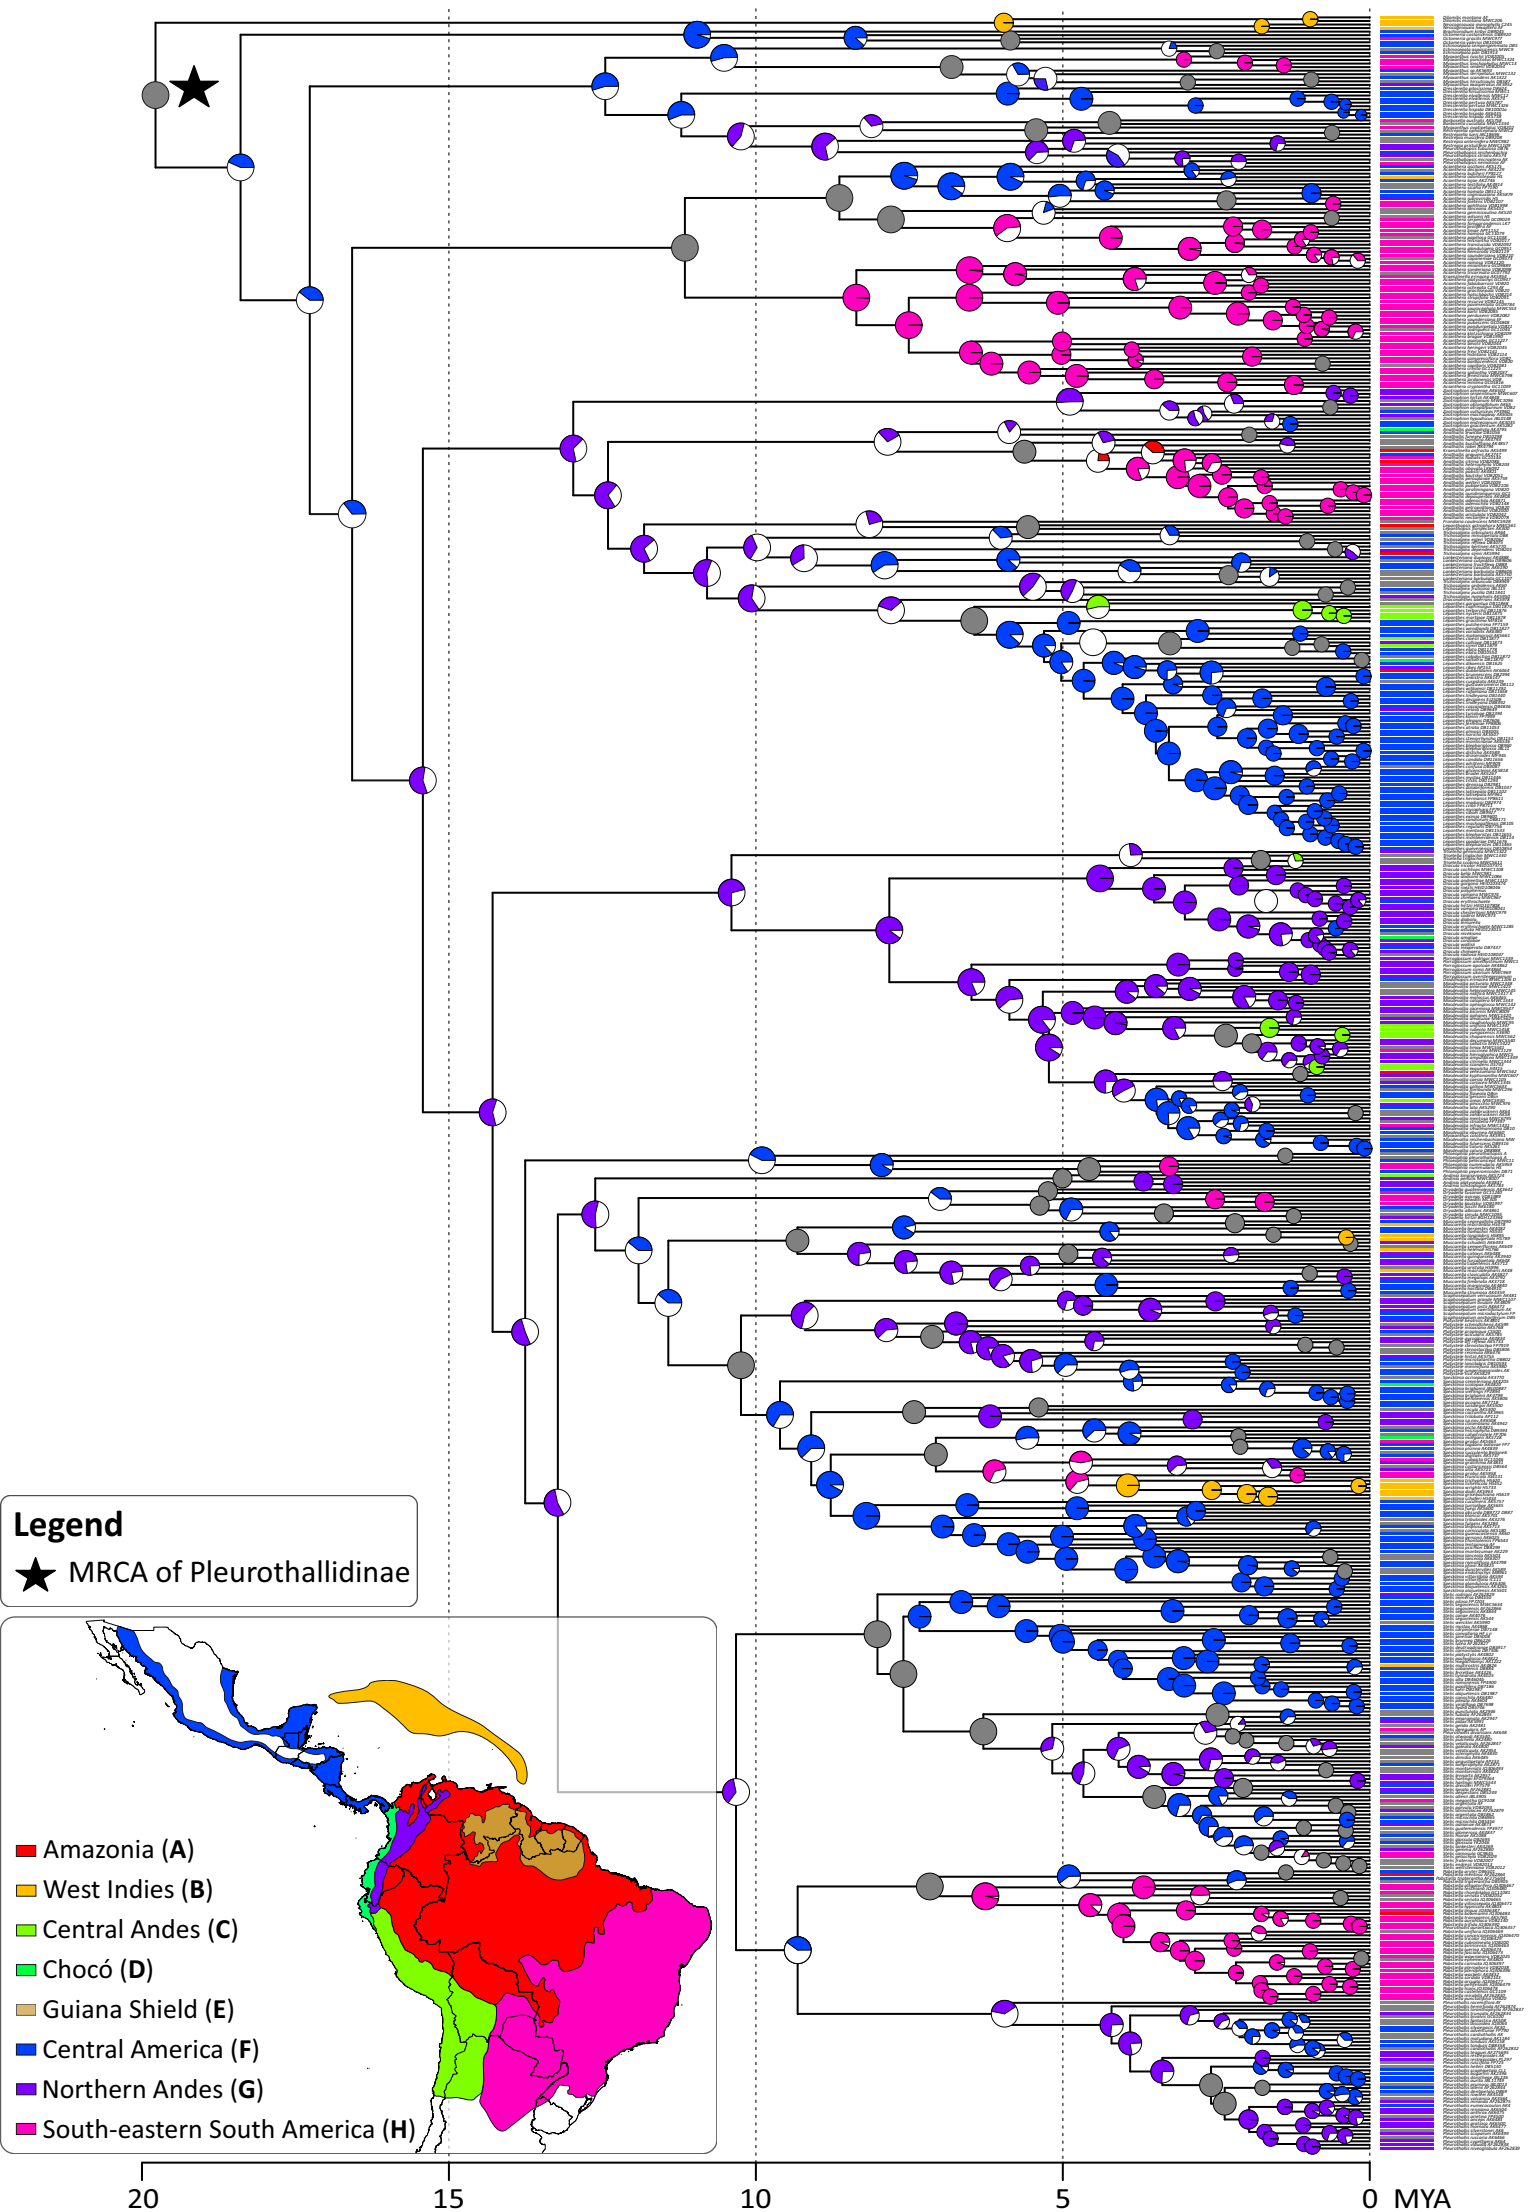

**Figure S13.** Biogeographical history of Pleurothallidinae as inferred by BioGeoBEARS (DEC+J model)



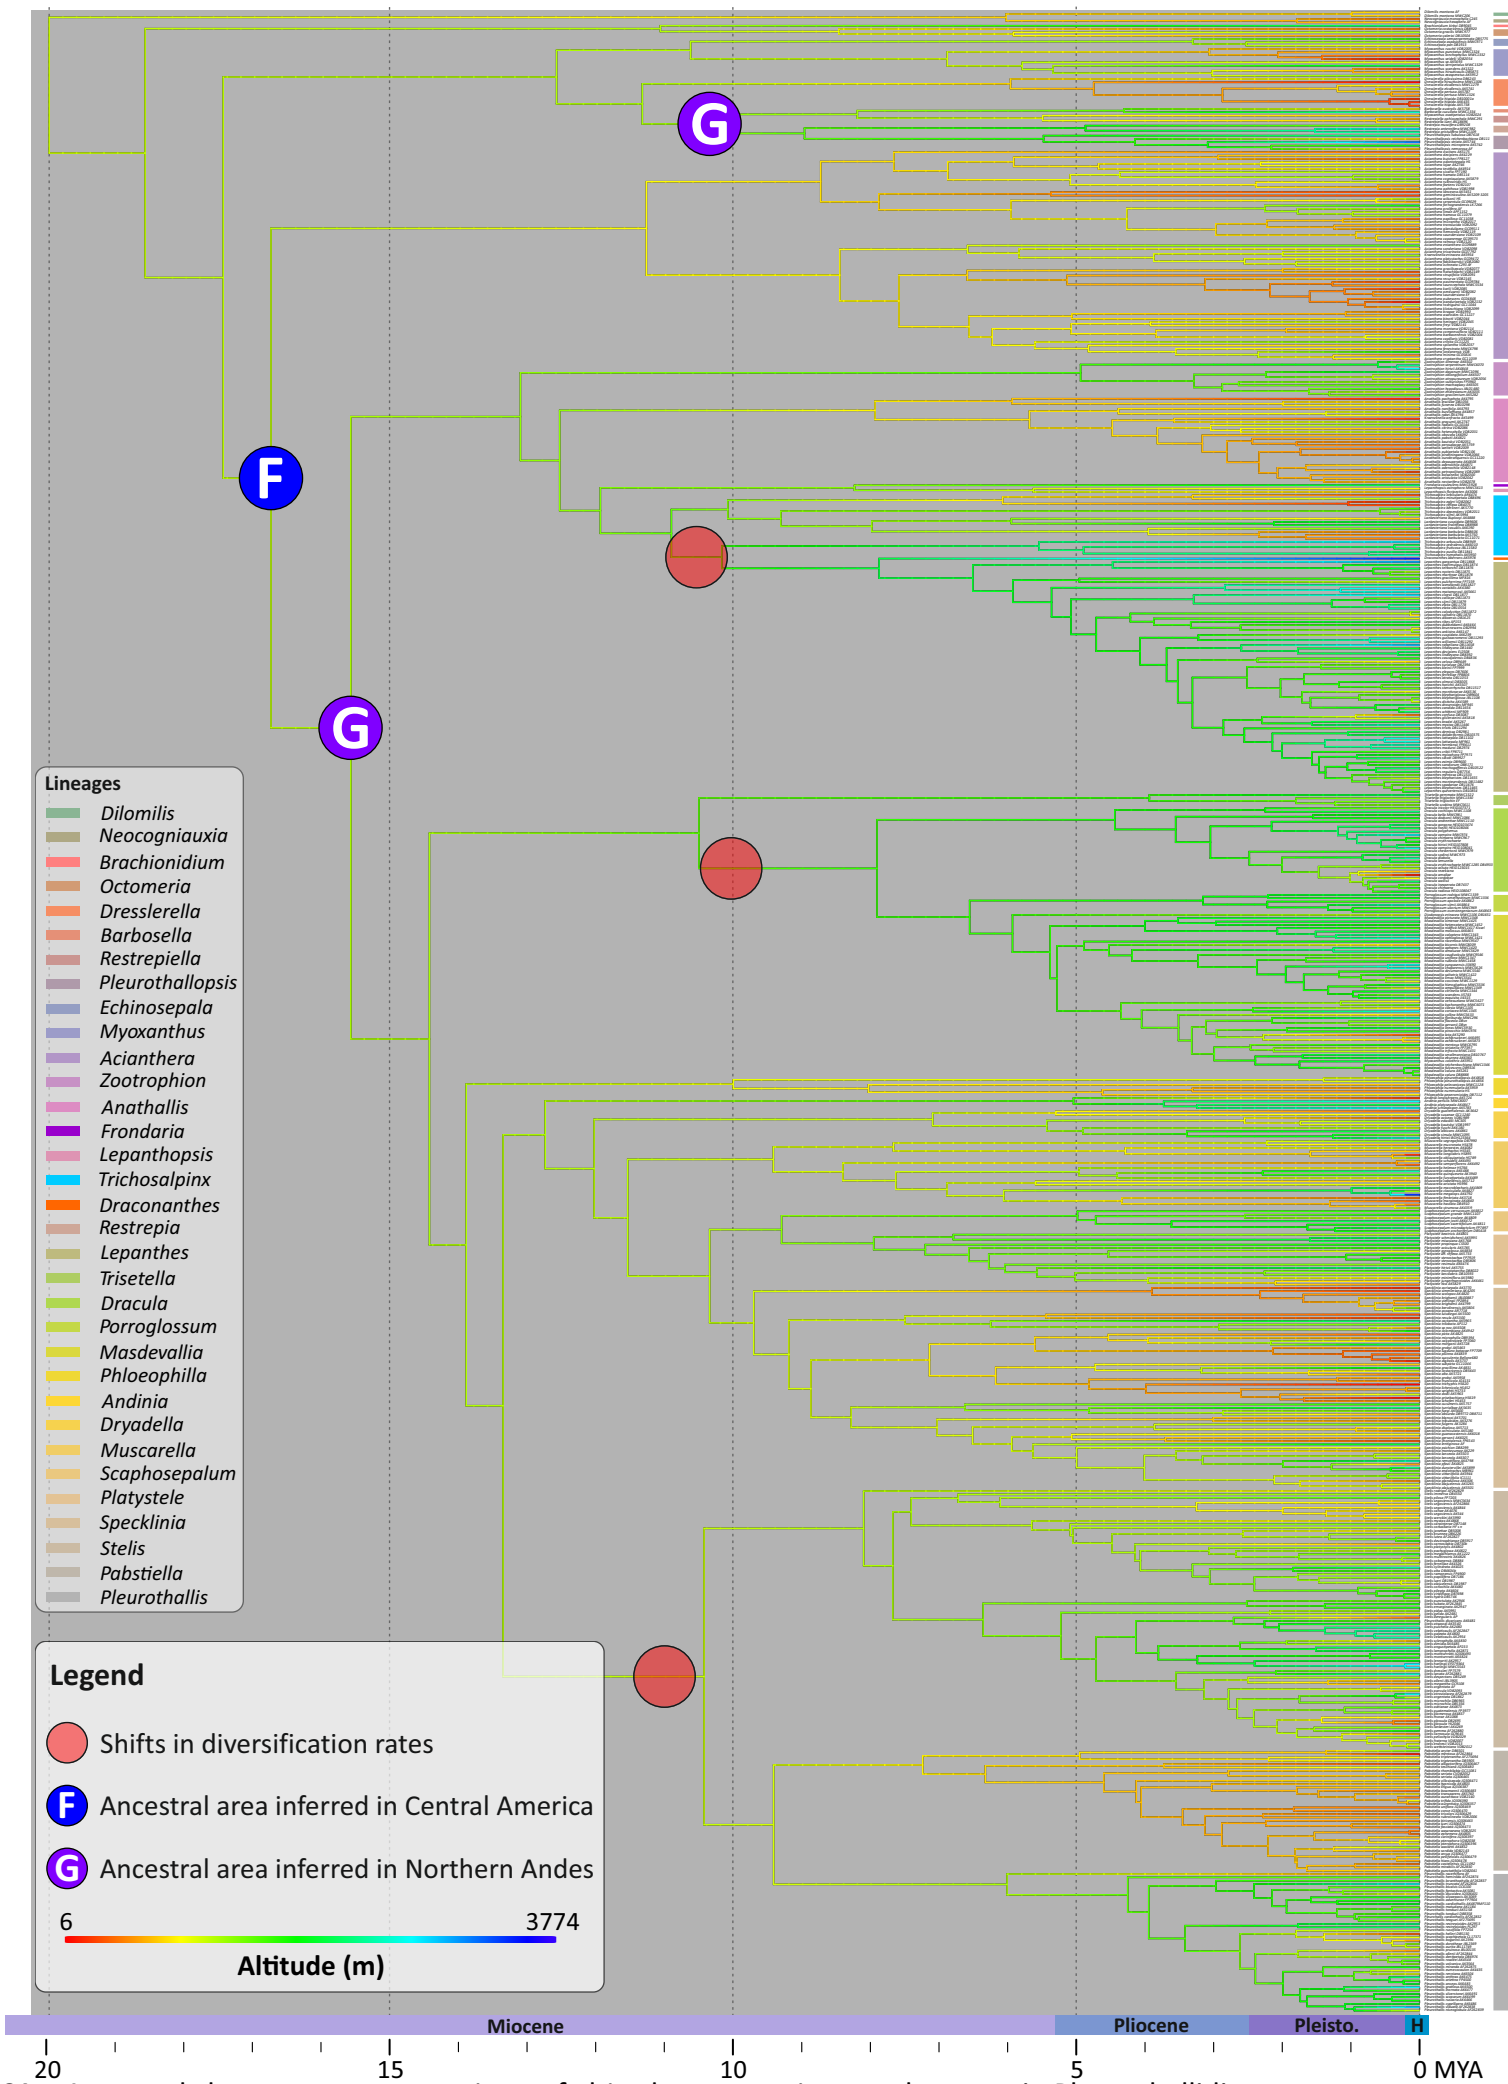

**Figure S14.** Ancestral character reconstruction of altitude as a continuous character in Pleurothallidinae

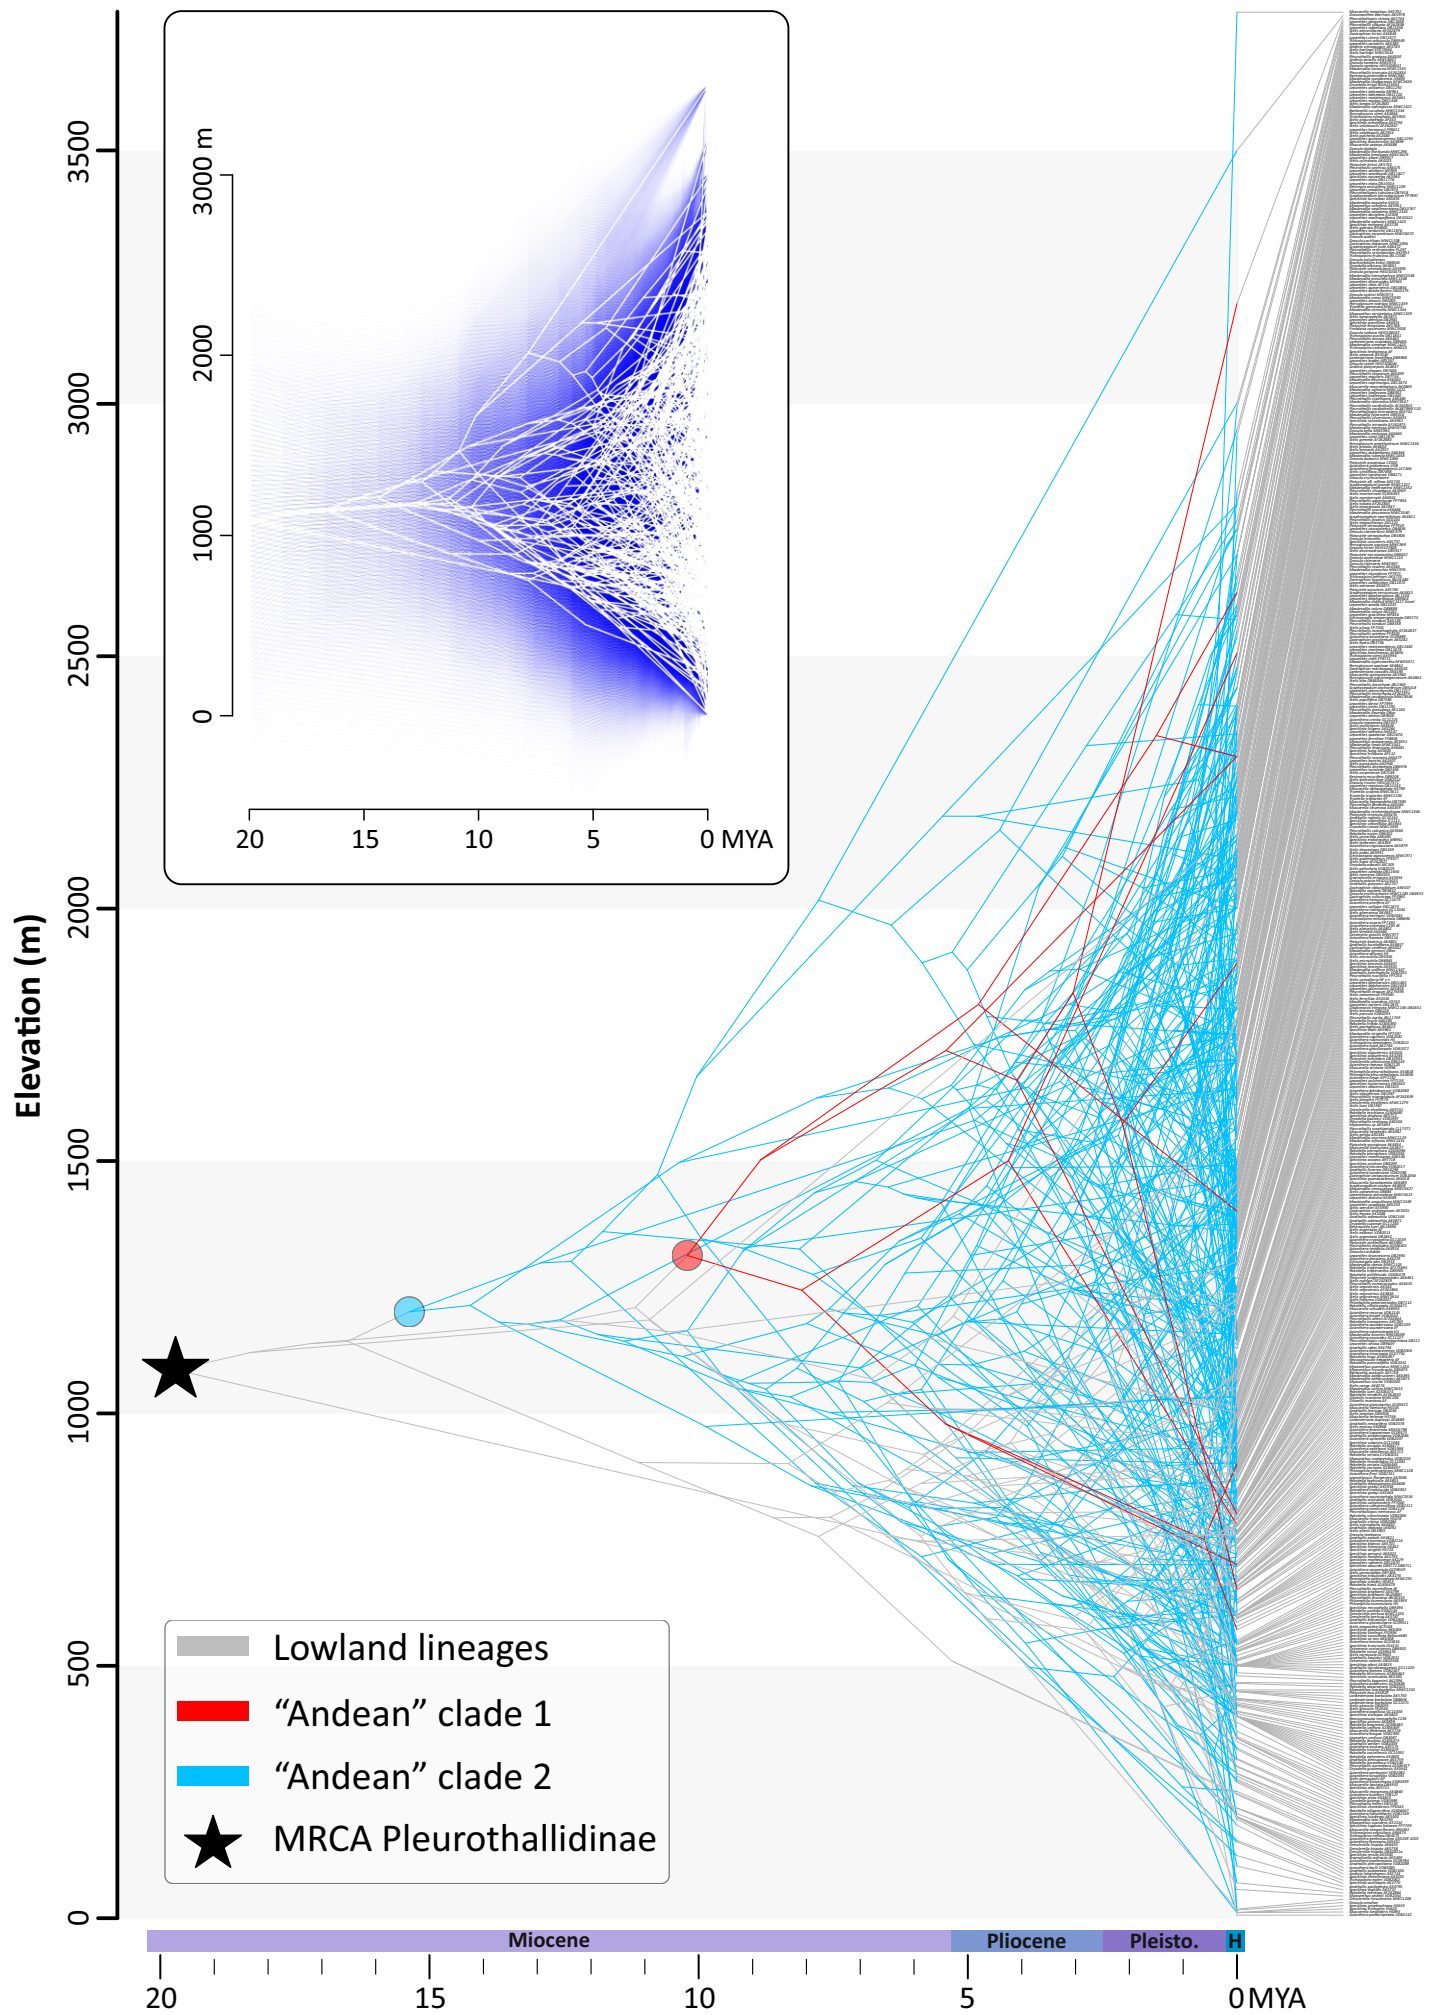

**Figure S15.** Traitgram of altitude change as a function of time in Pleurothallidinae

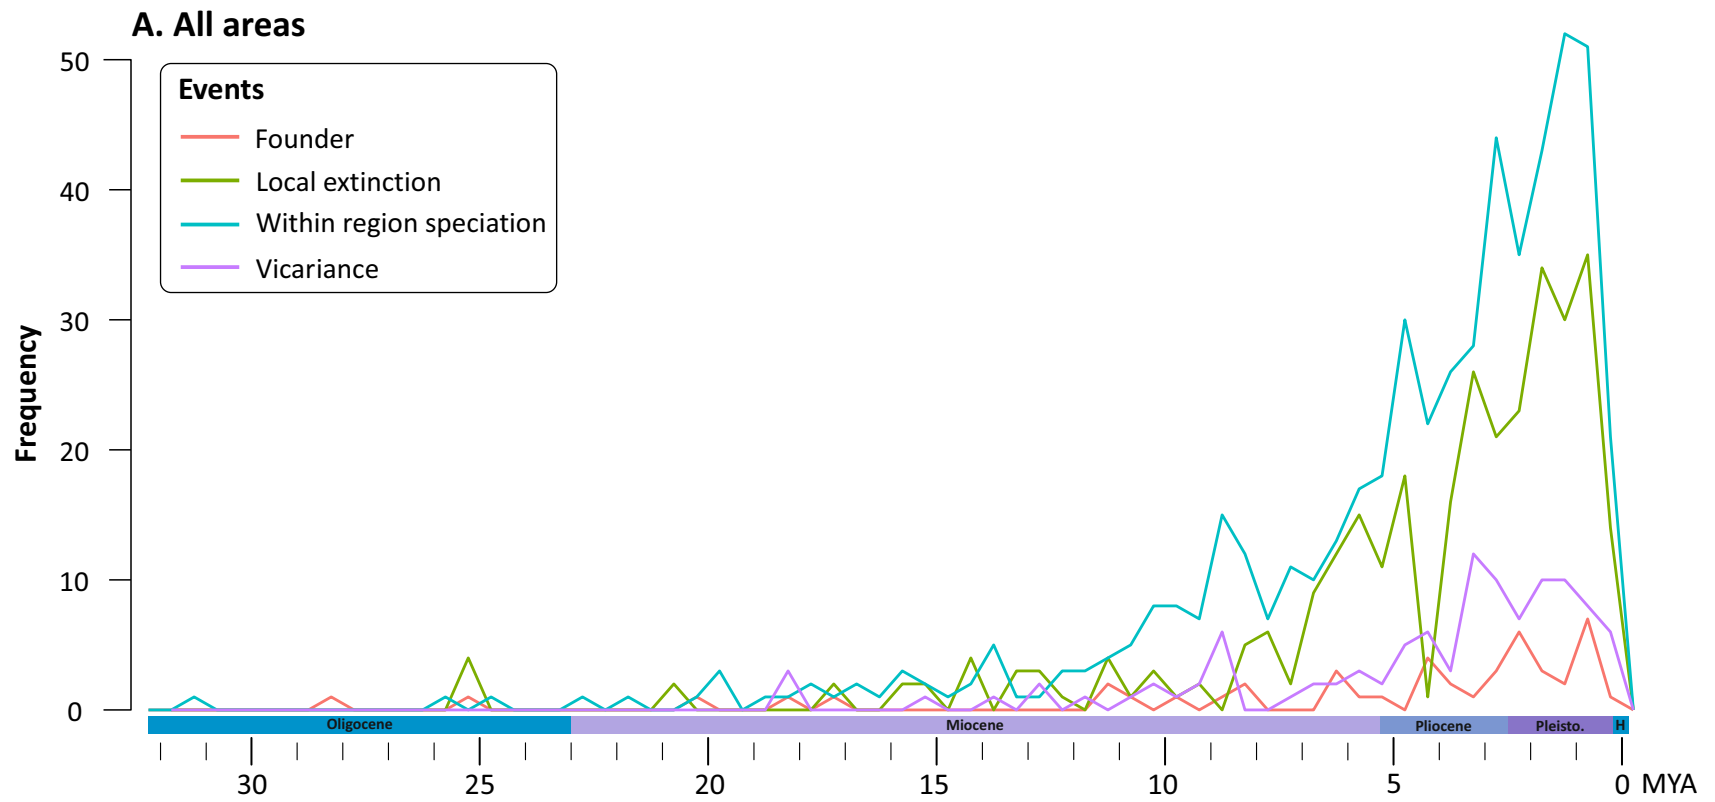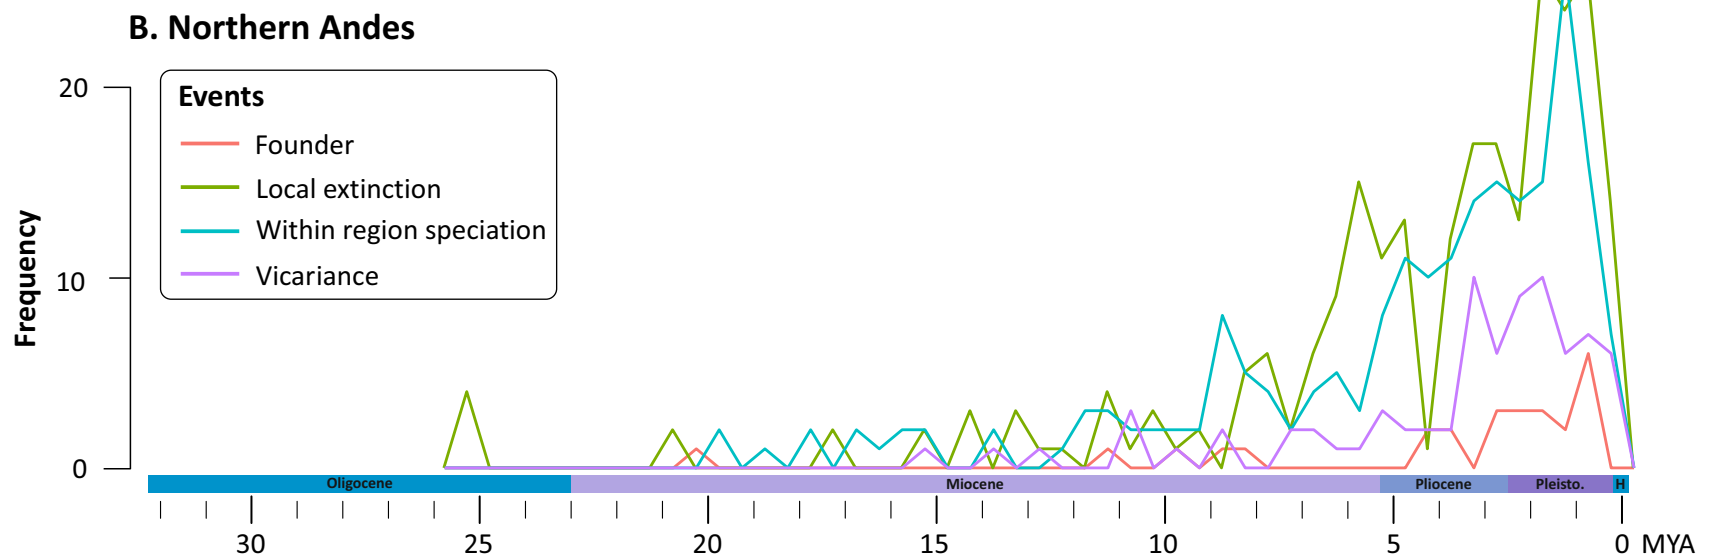

**Figure S16.** Frequency of relevant biogeographical events through time in Cymbiidae as inferred by Biogeographical Stochastic Mapping.

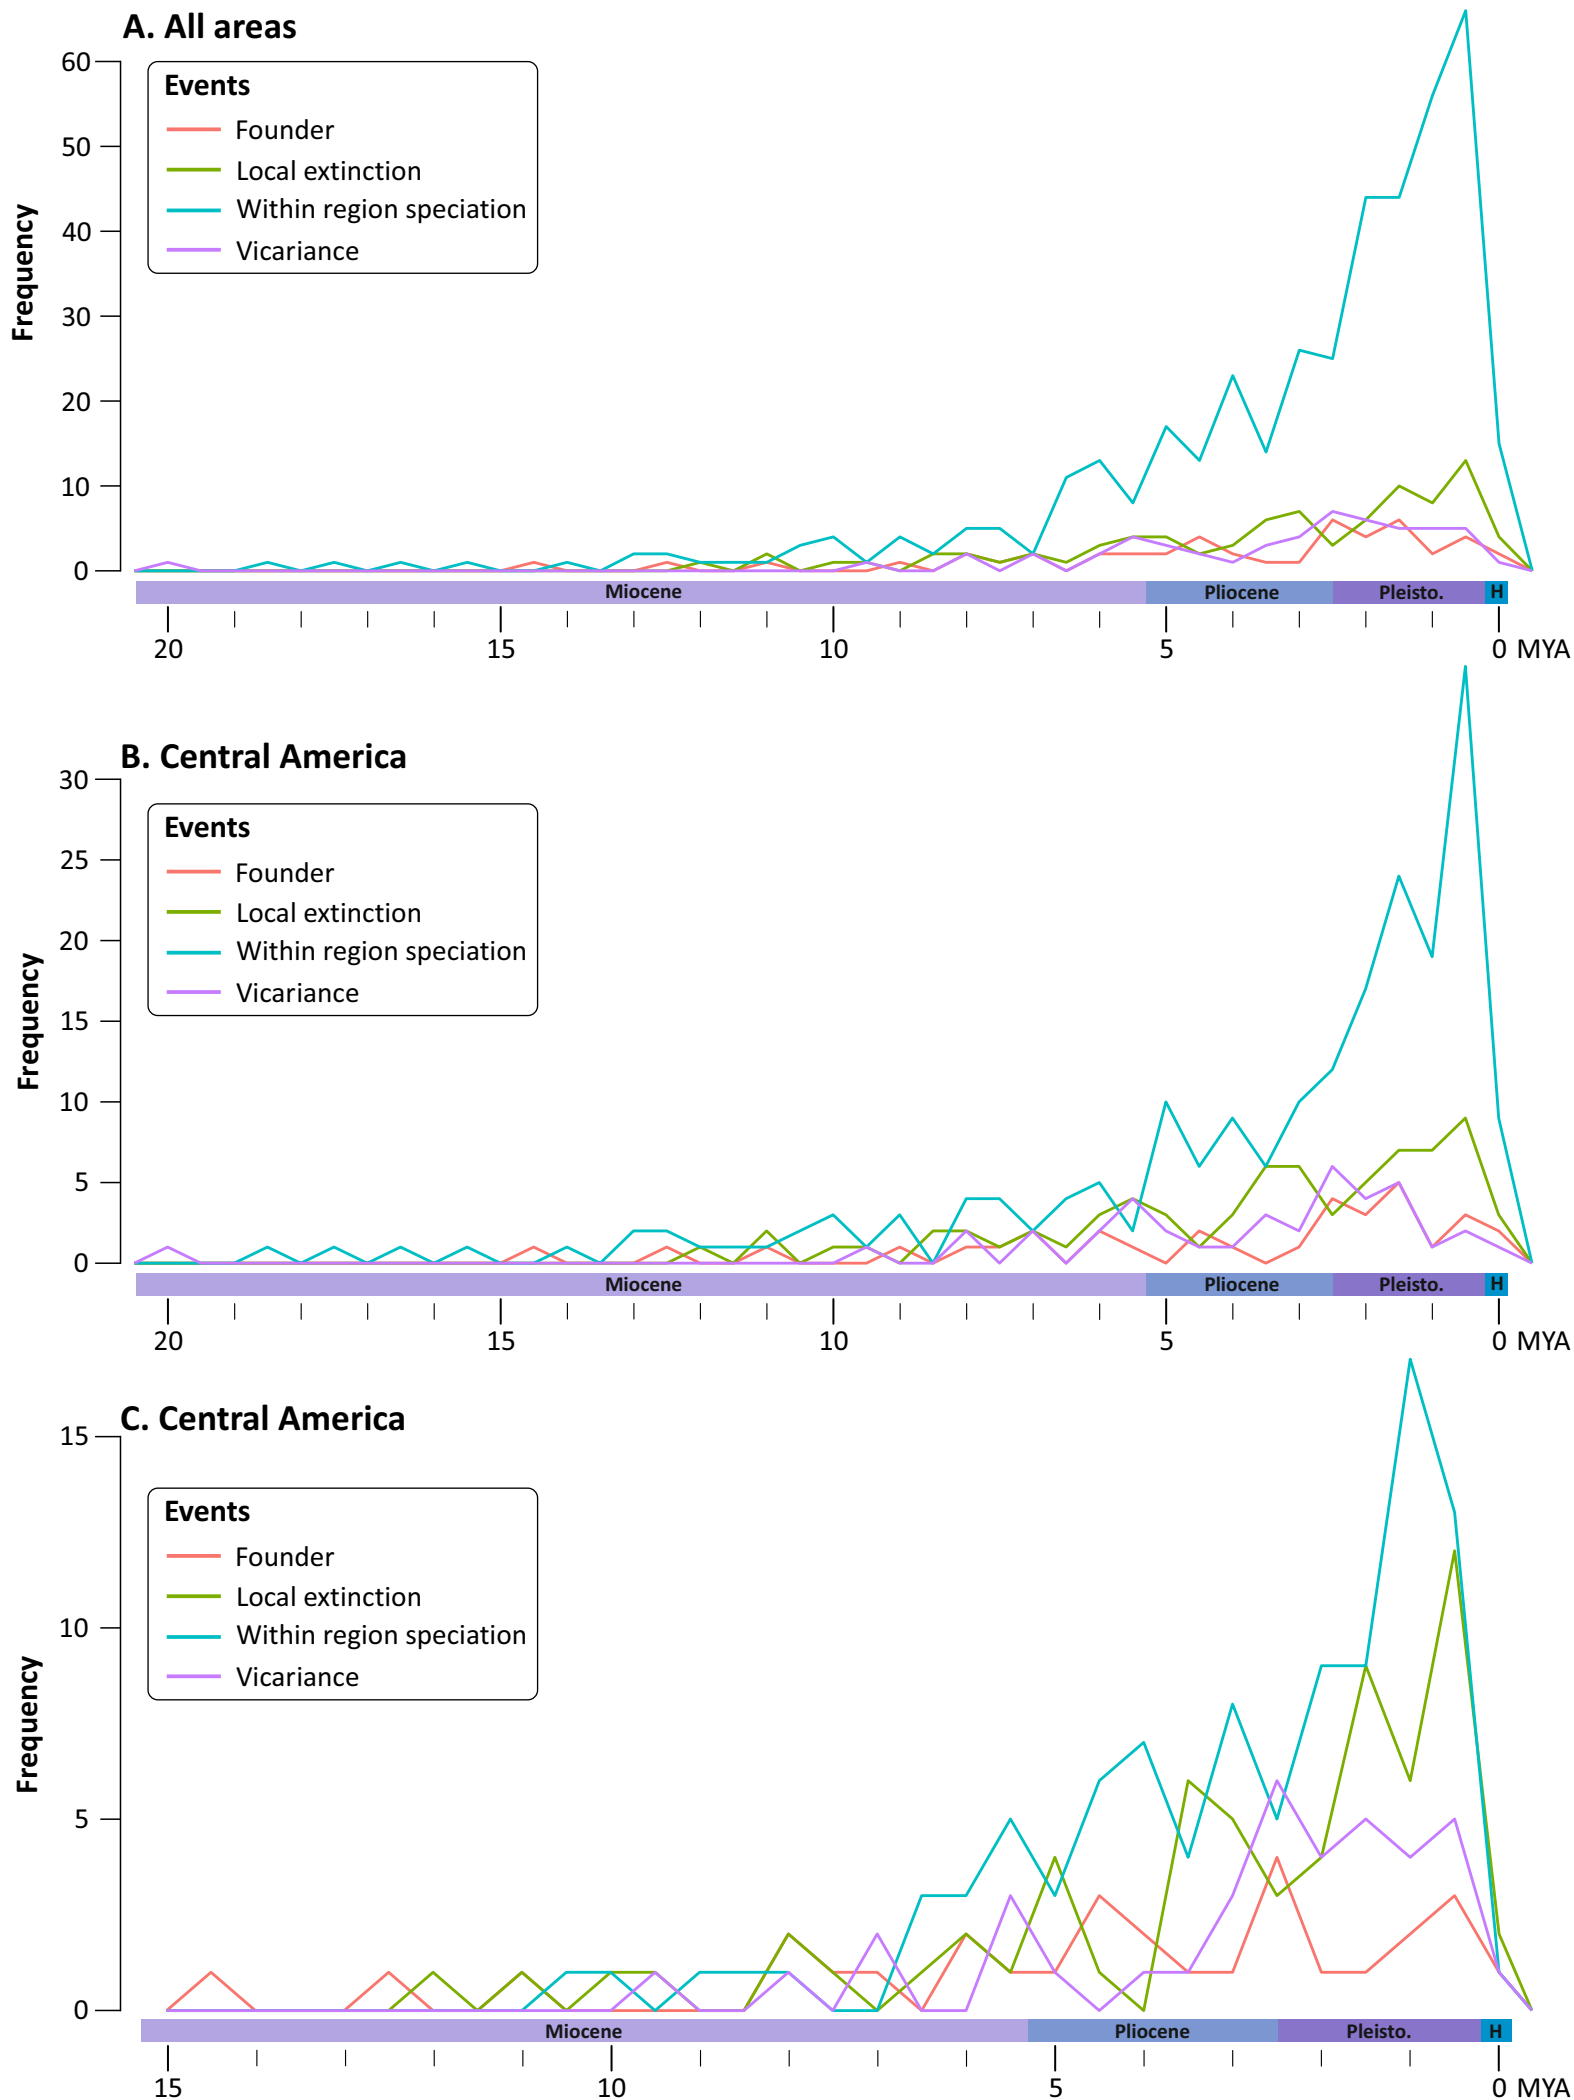

**Figure S17.** Frequency of relevant biogeographical events through time in Pleurothallidinae as inferred by Biogeographical Stochastic Mapping.



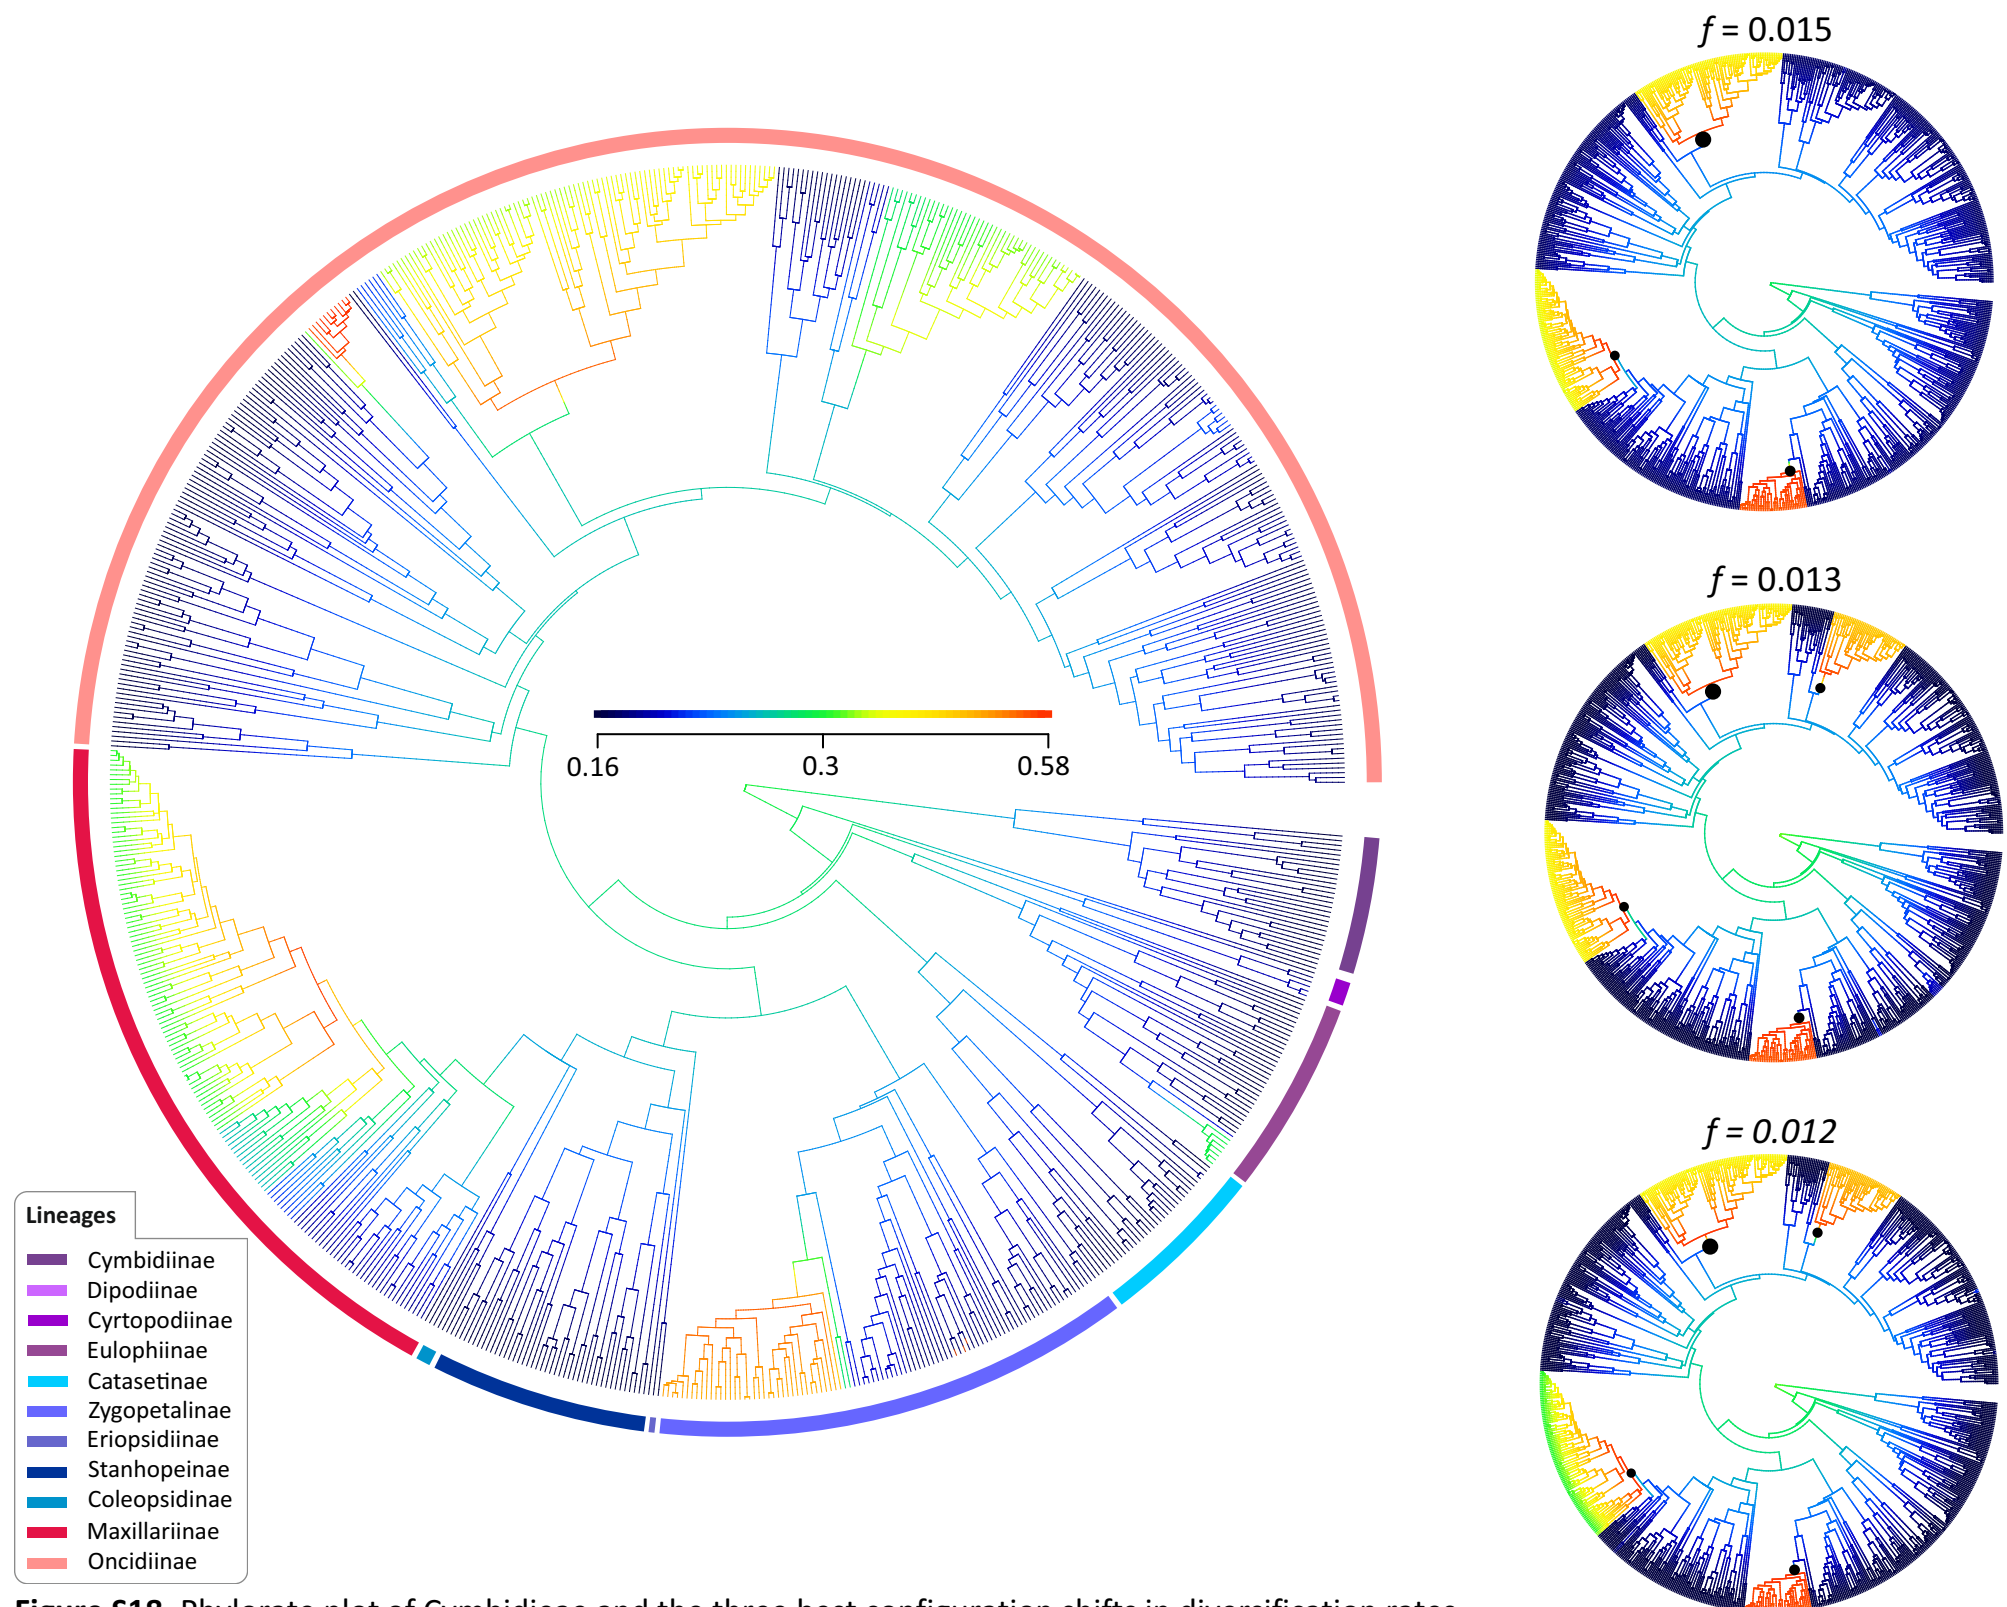

**Figure S18.** Phylorate plot of Cymbidieae and the three best configuration shifts in diversification rates

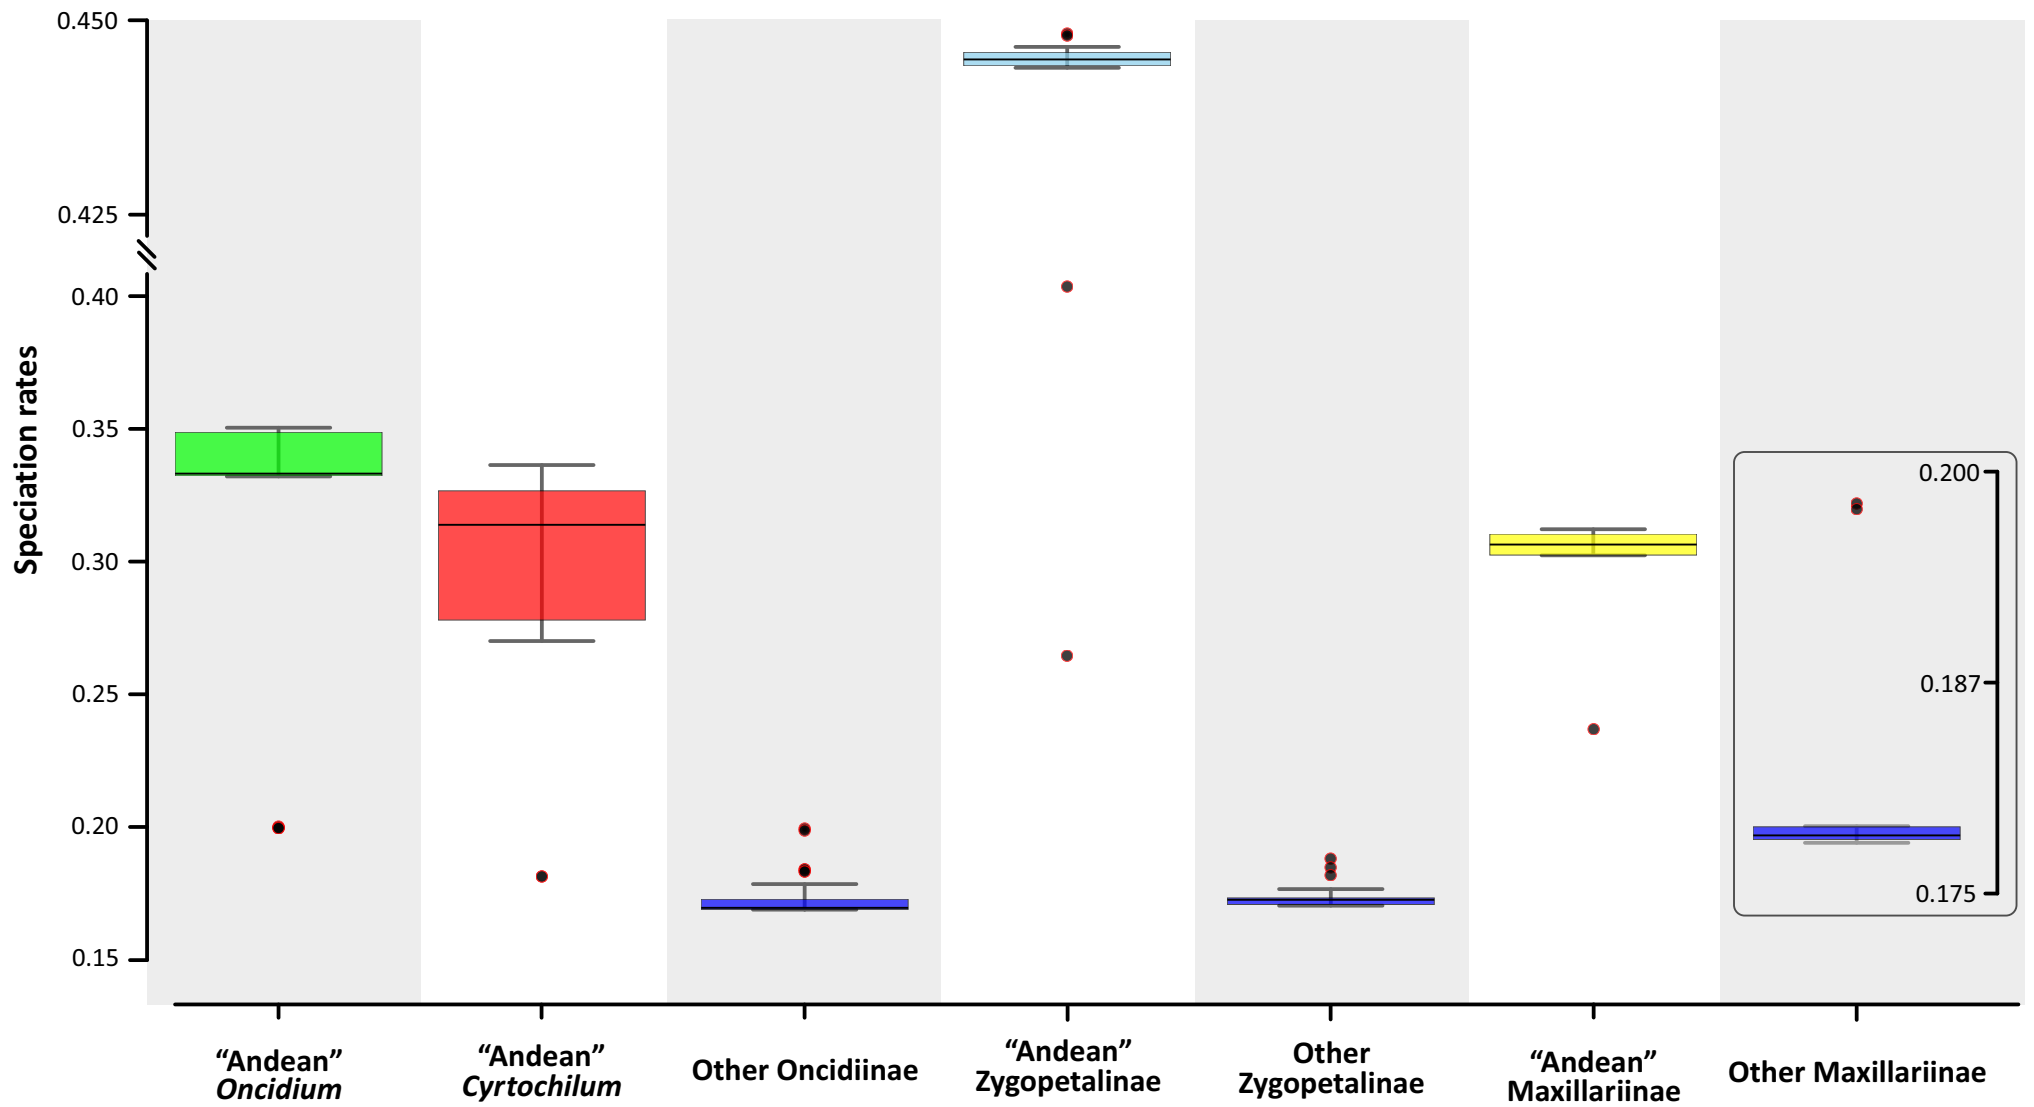

**Figure S19.** Tip speciation rates of Cymbidiinae clades with diversification rate shifts vs. sister clades (no diversification rate shifts) as inferred in BAMM

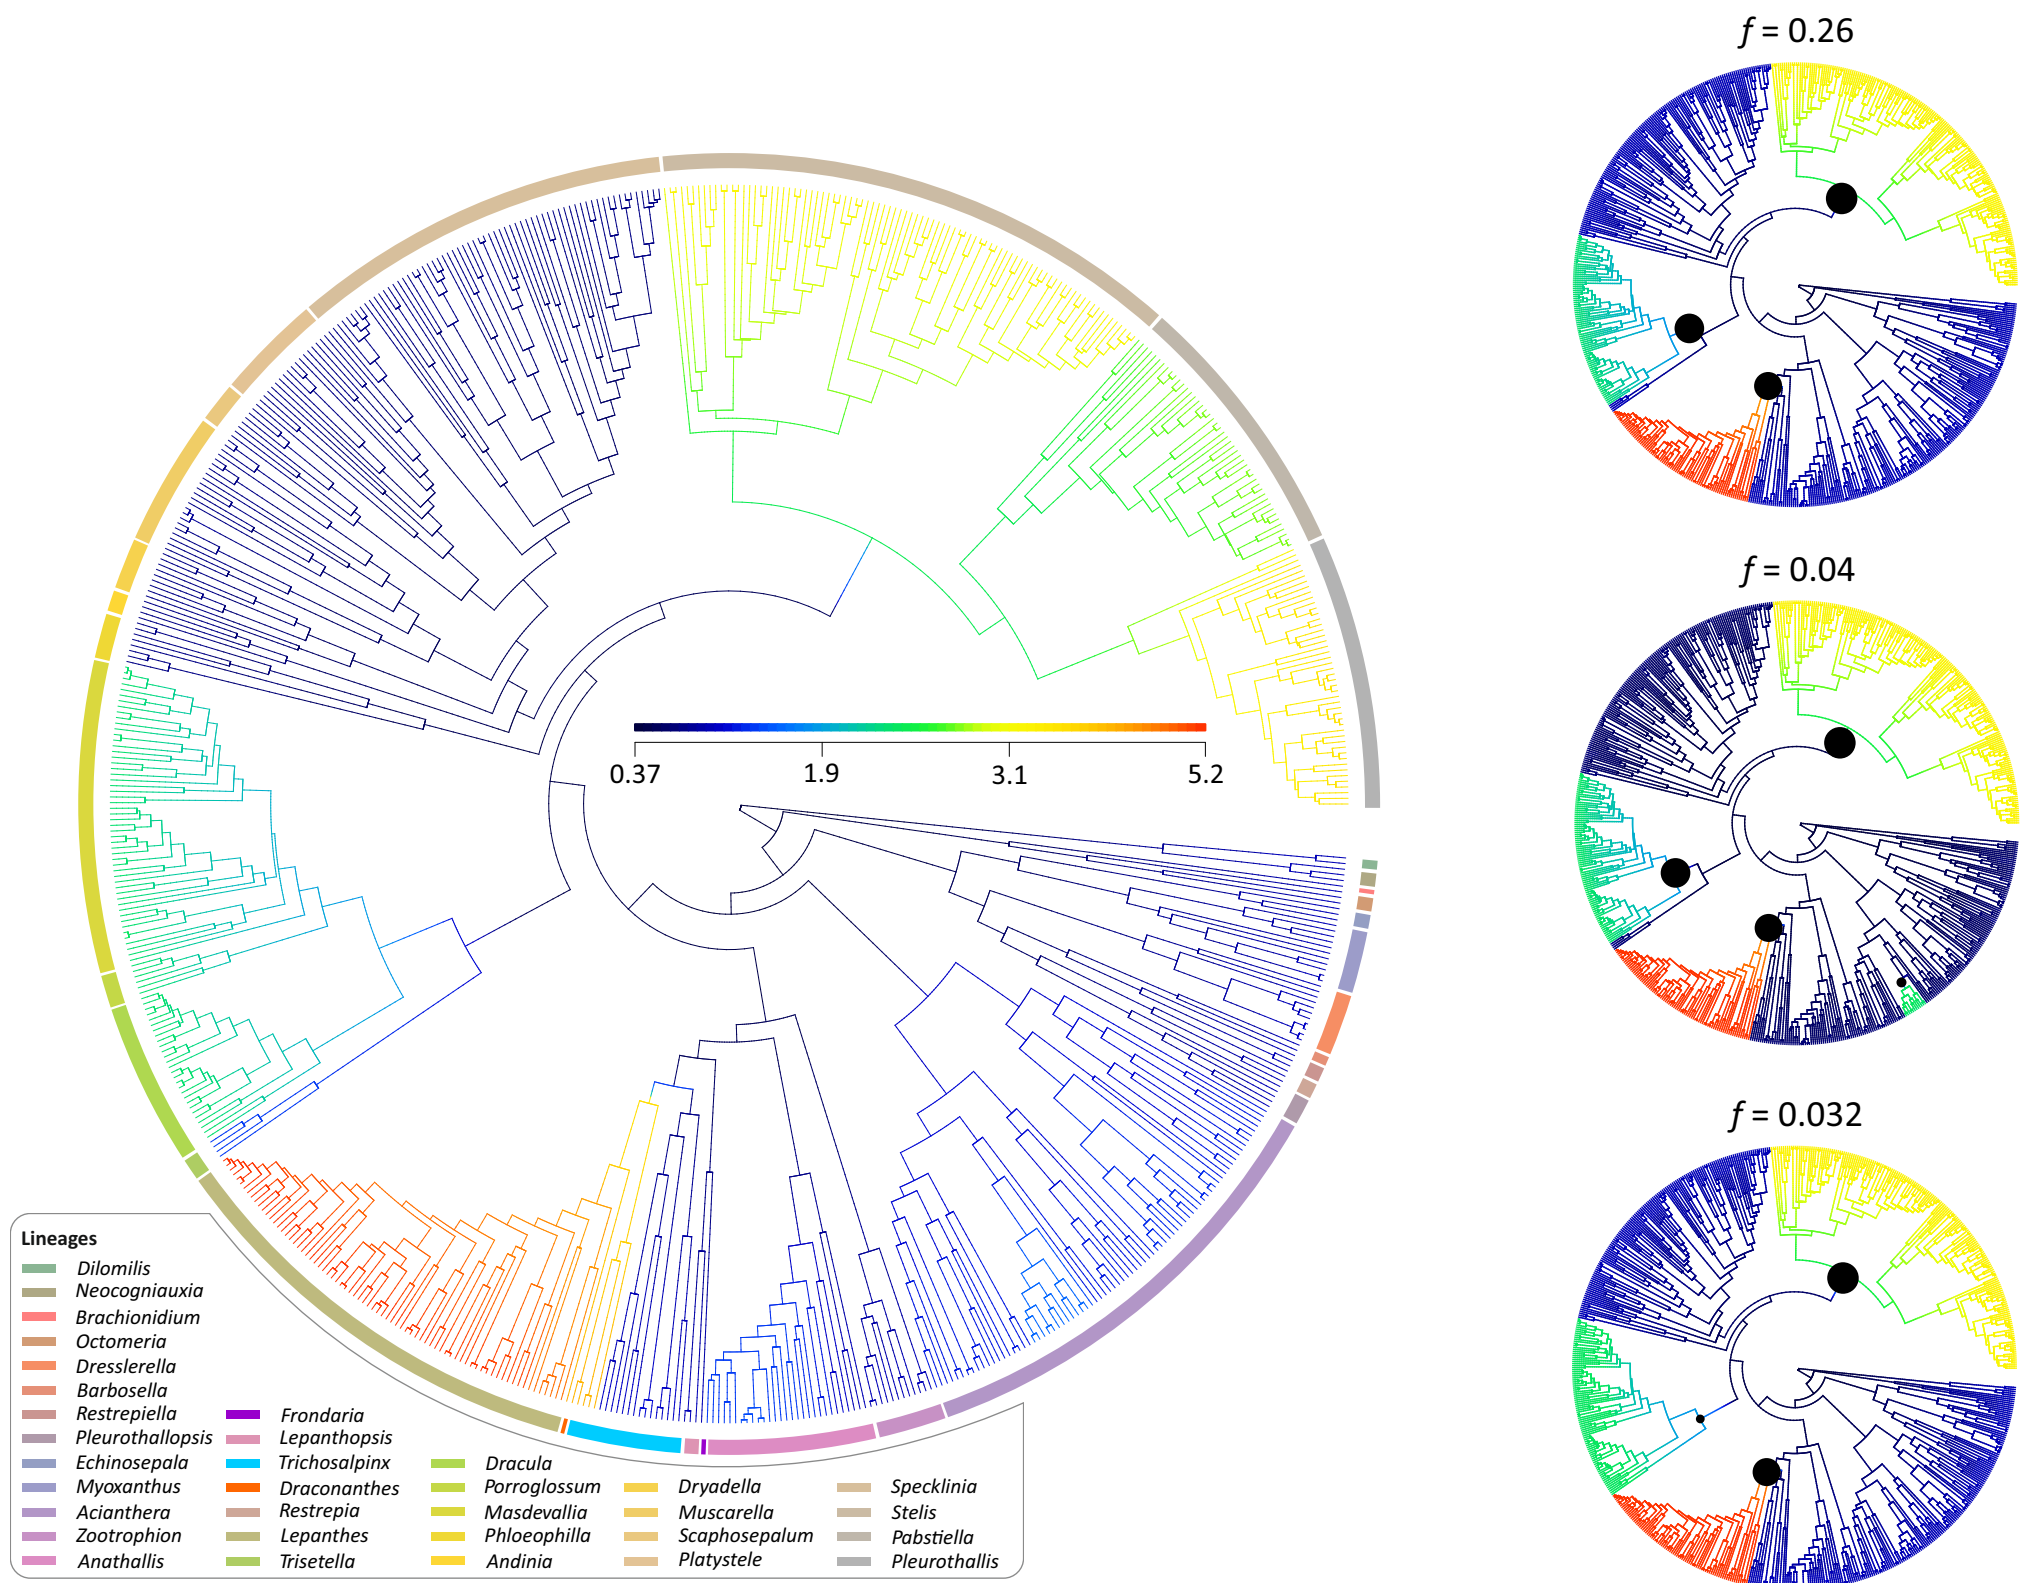

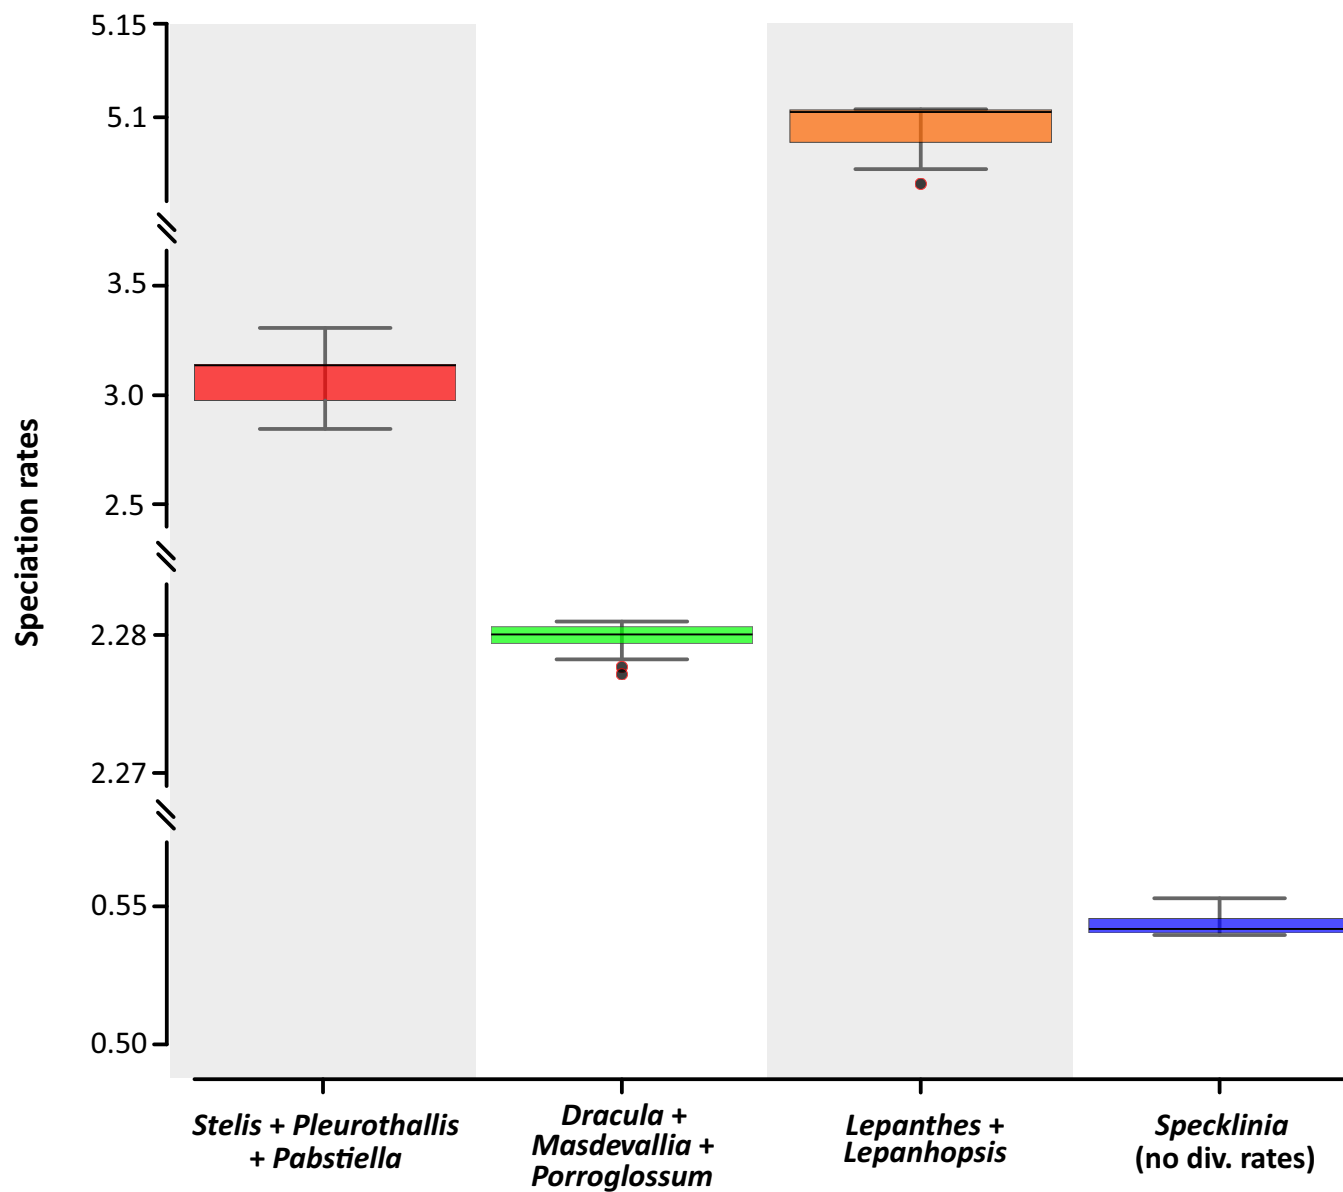

Figure S21. Tip speciation rates of Pleurothallidinae clades with diversification rate shifts vs. sister clades (no diversification rate shifts) as inferred in BAMM



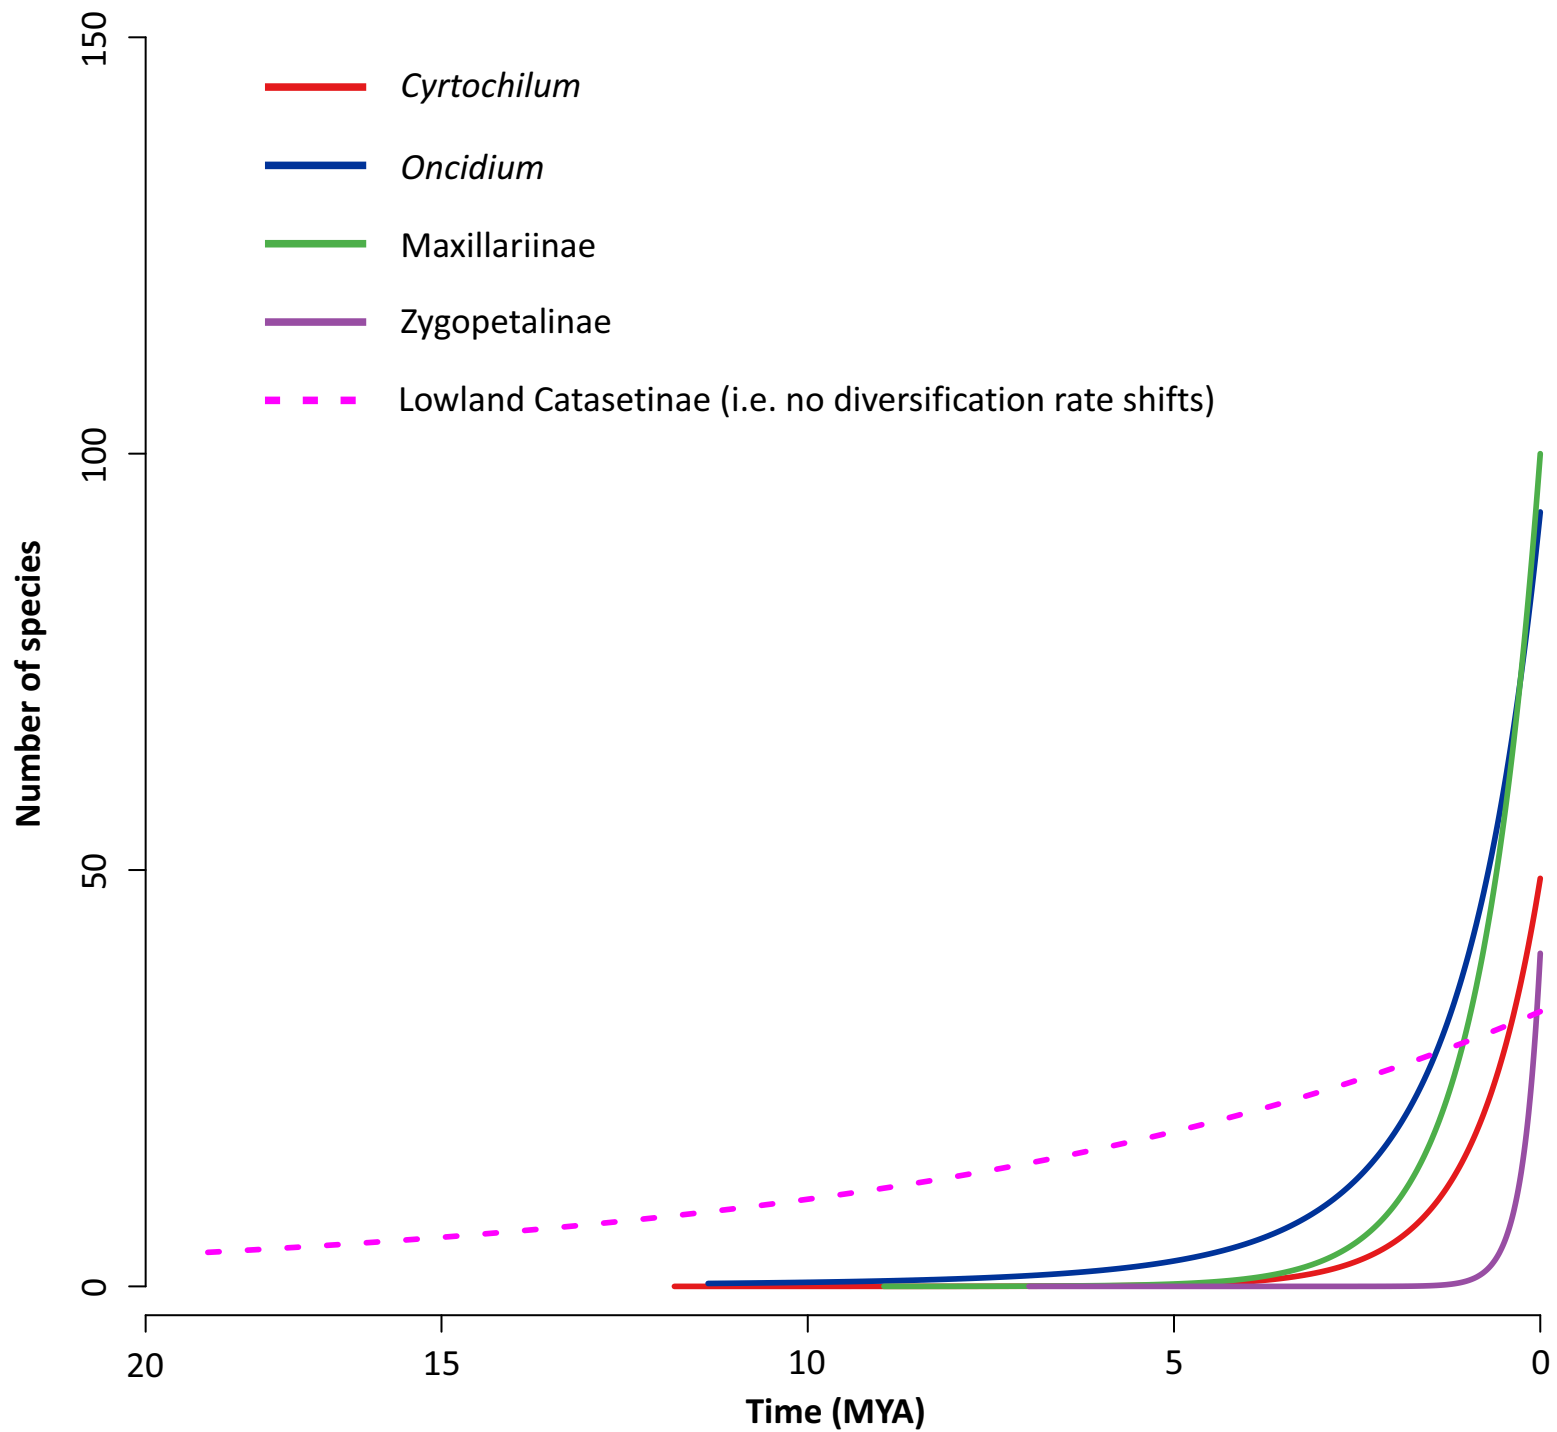

**Figure S22.** Diversity through time of clades with diversification rate shifts vs. Catasetinae (no diversification rate shifts)

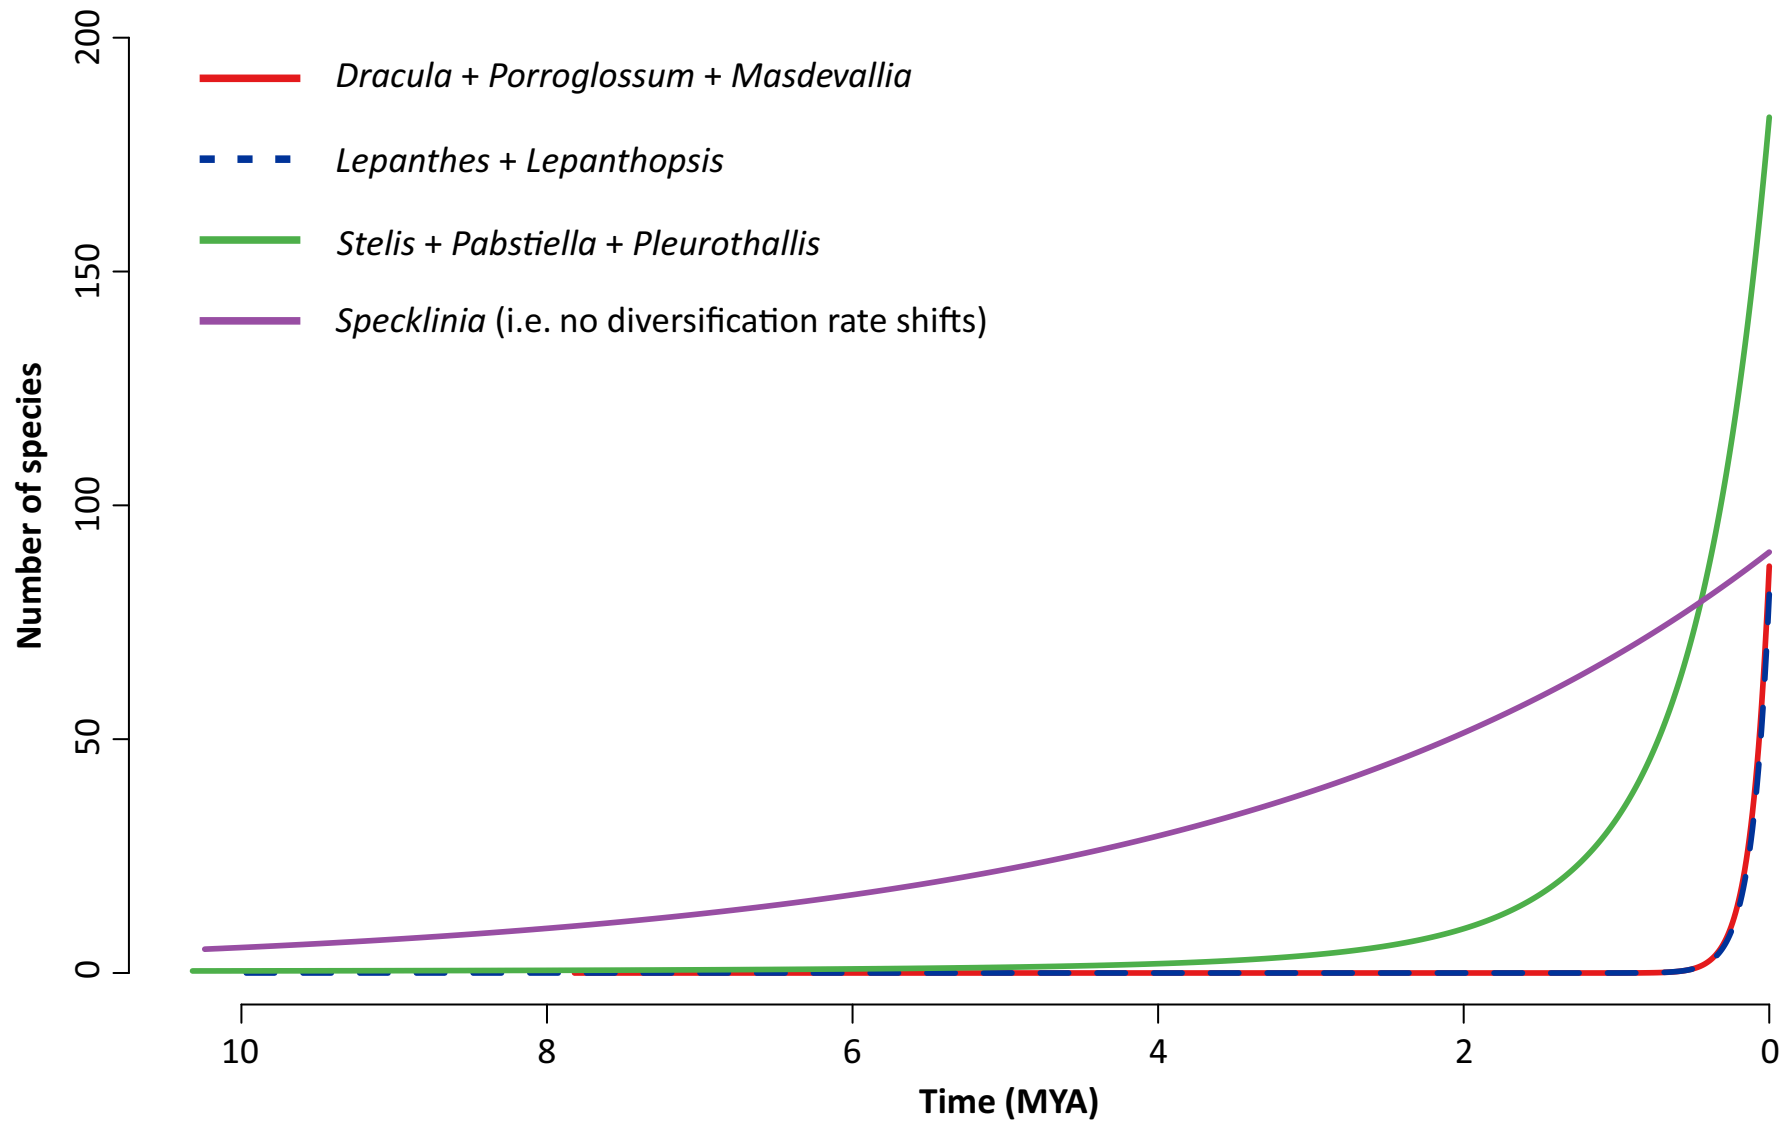

**Figure S23.** Diversity through time of clades with diversification rate shifts vs. *Specklinia* (no diversification rate shifts)

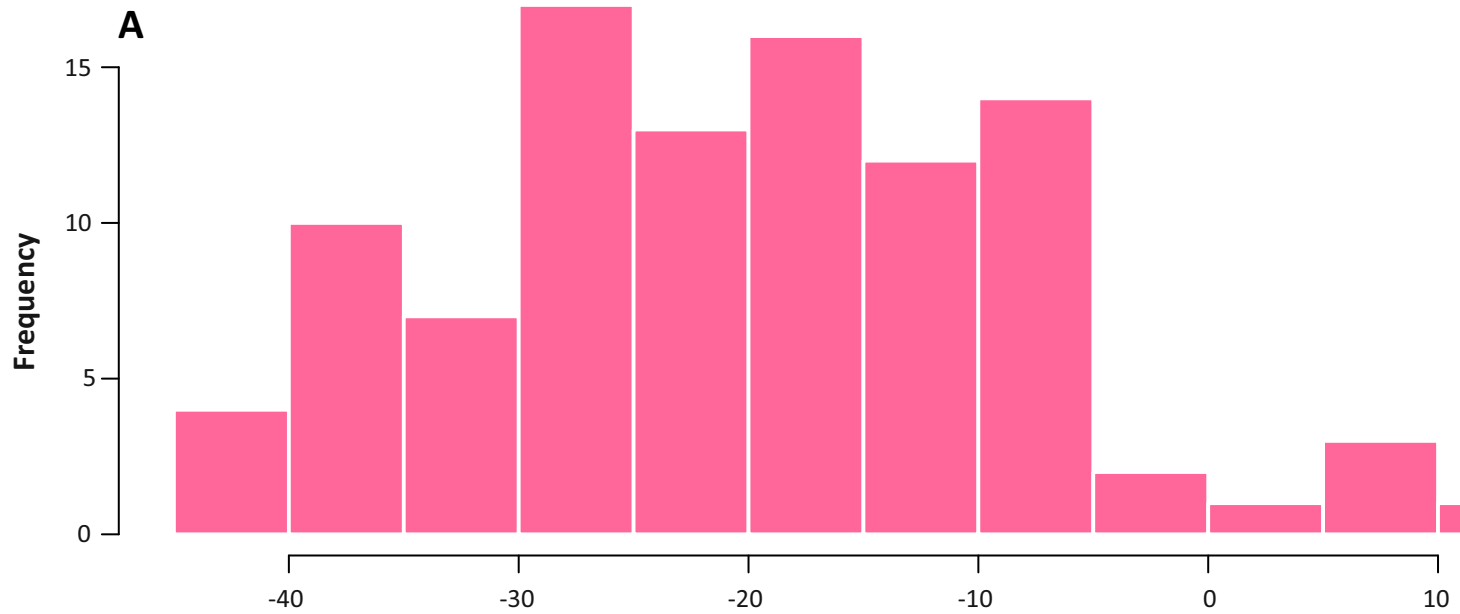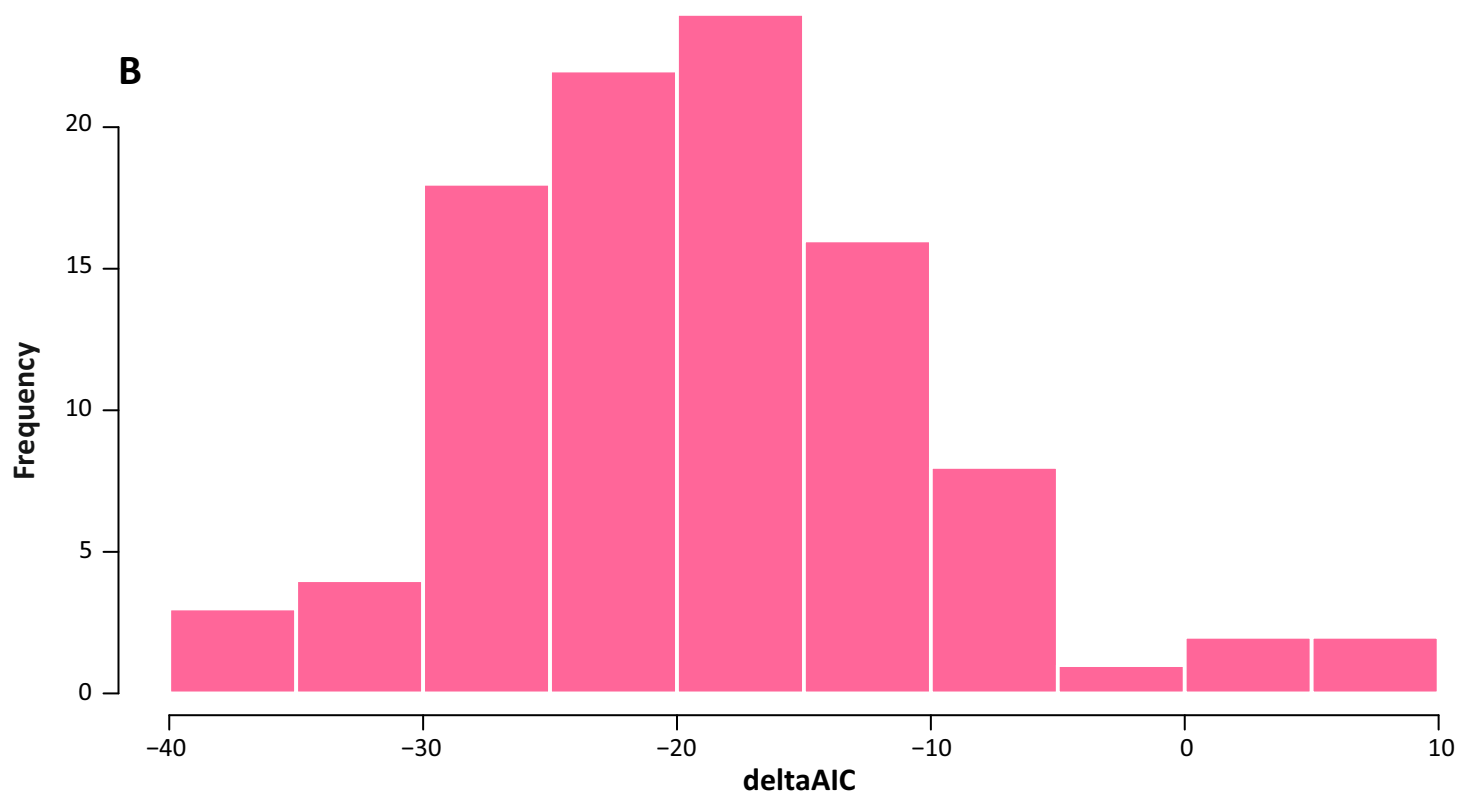

**Figure S24.** Null distribution of dAIC obtained from randomly shuffled geographic distribution data of A) Cymbidieae and B) Pleurothallidinae

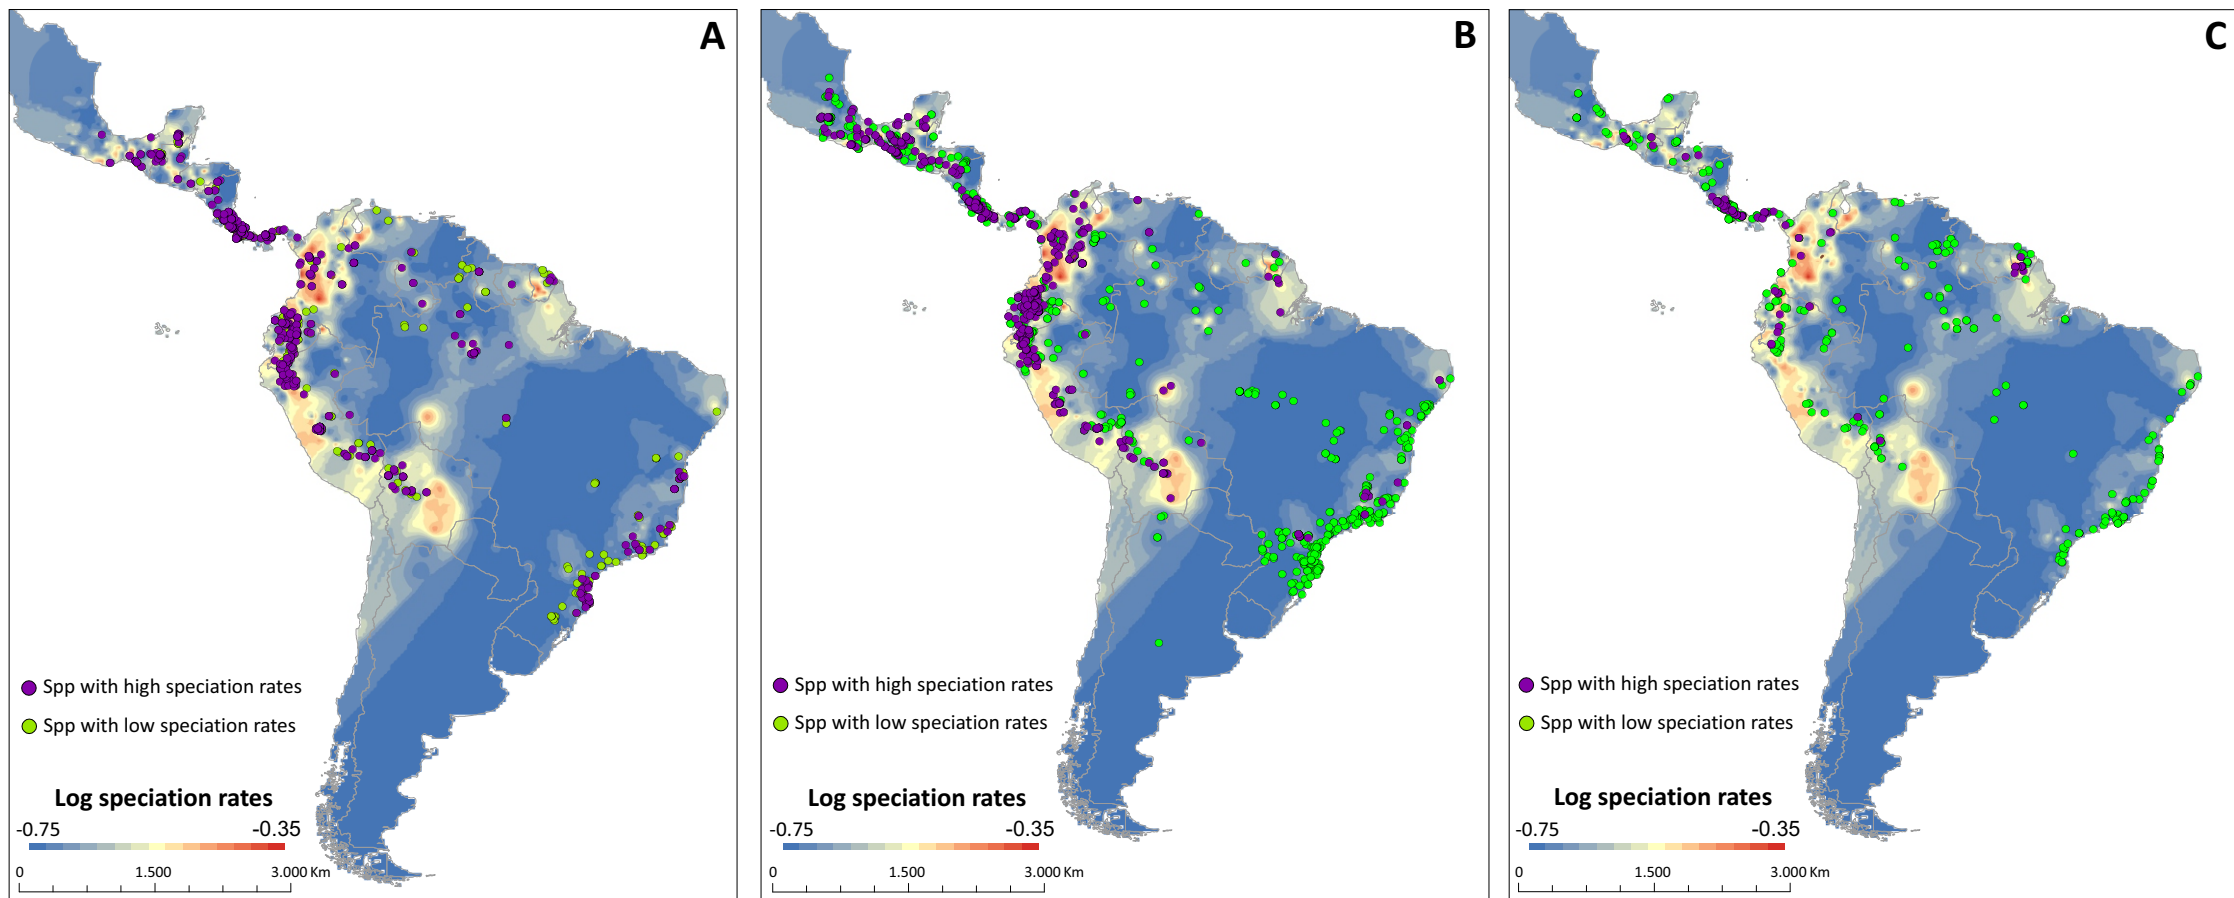

**Figure S25.** Distribution of Cymbidiinae species included in clades with high and low speciation rates. **A)** Maxillariinae; **B)** Oncidiinae; **C)** Zygopetalinae

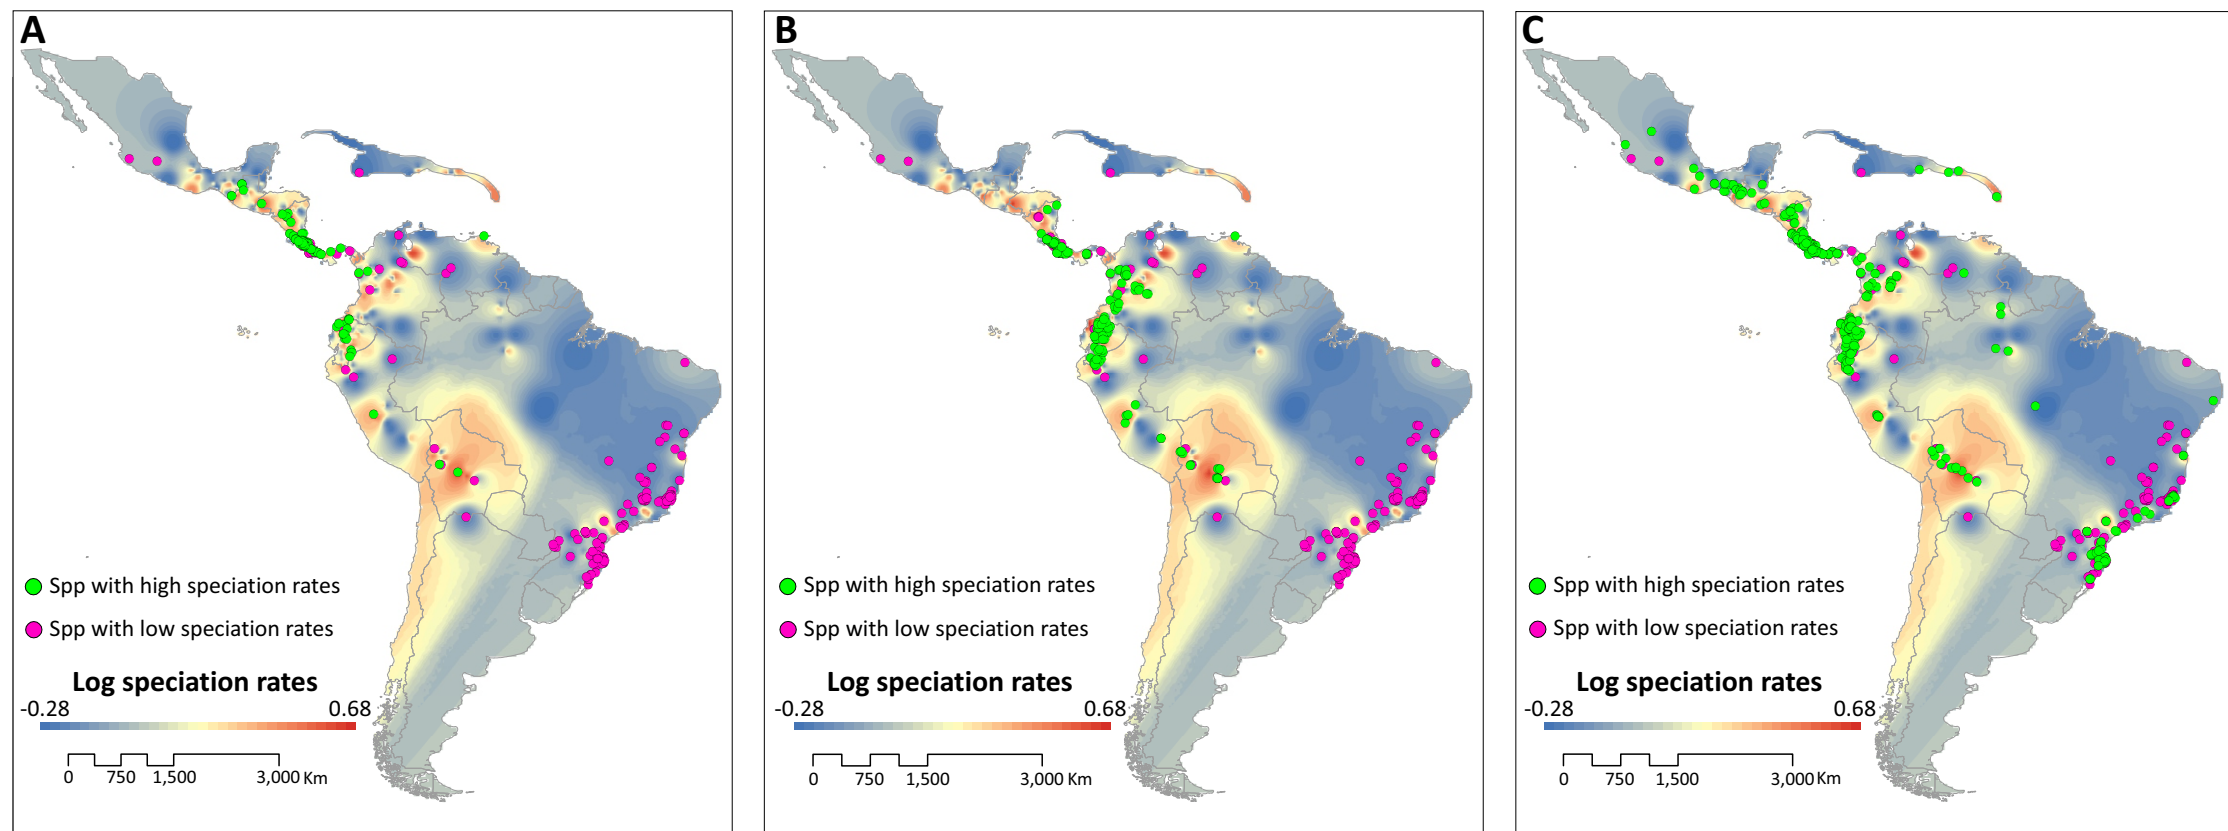

**Figure S26.** Distribution of Pleurothallidinae species included in clades with high and low speciation rates (i.e. *Acianthera*). **A)** *Lepanthes* + *Lepanthopsis*; **B)** *Masdevallia* + *Dracula* + *Porroglossum*; **C)** *Pabstiella* + *Pleurothallis* + *Stelis*

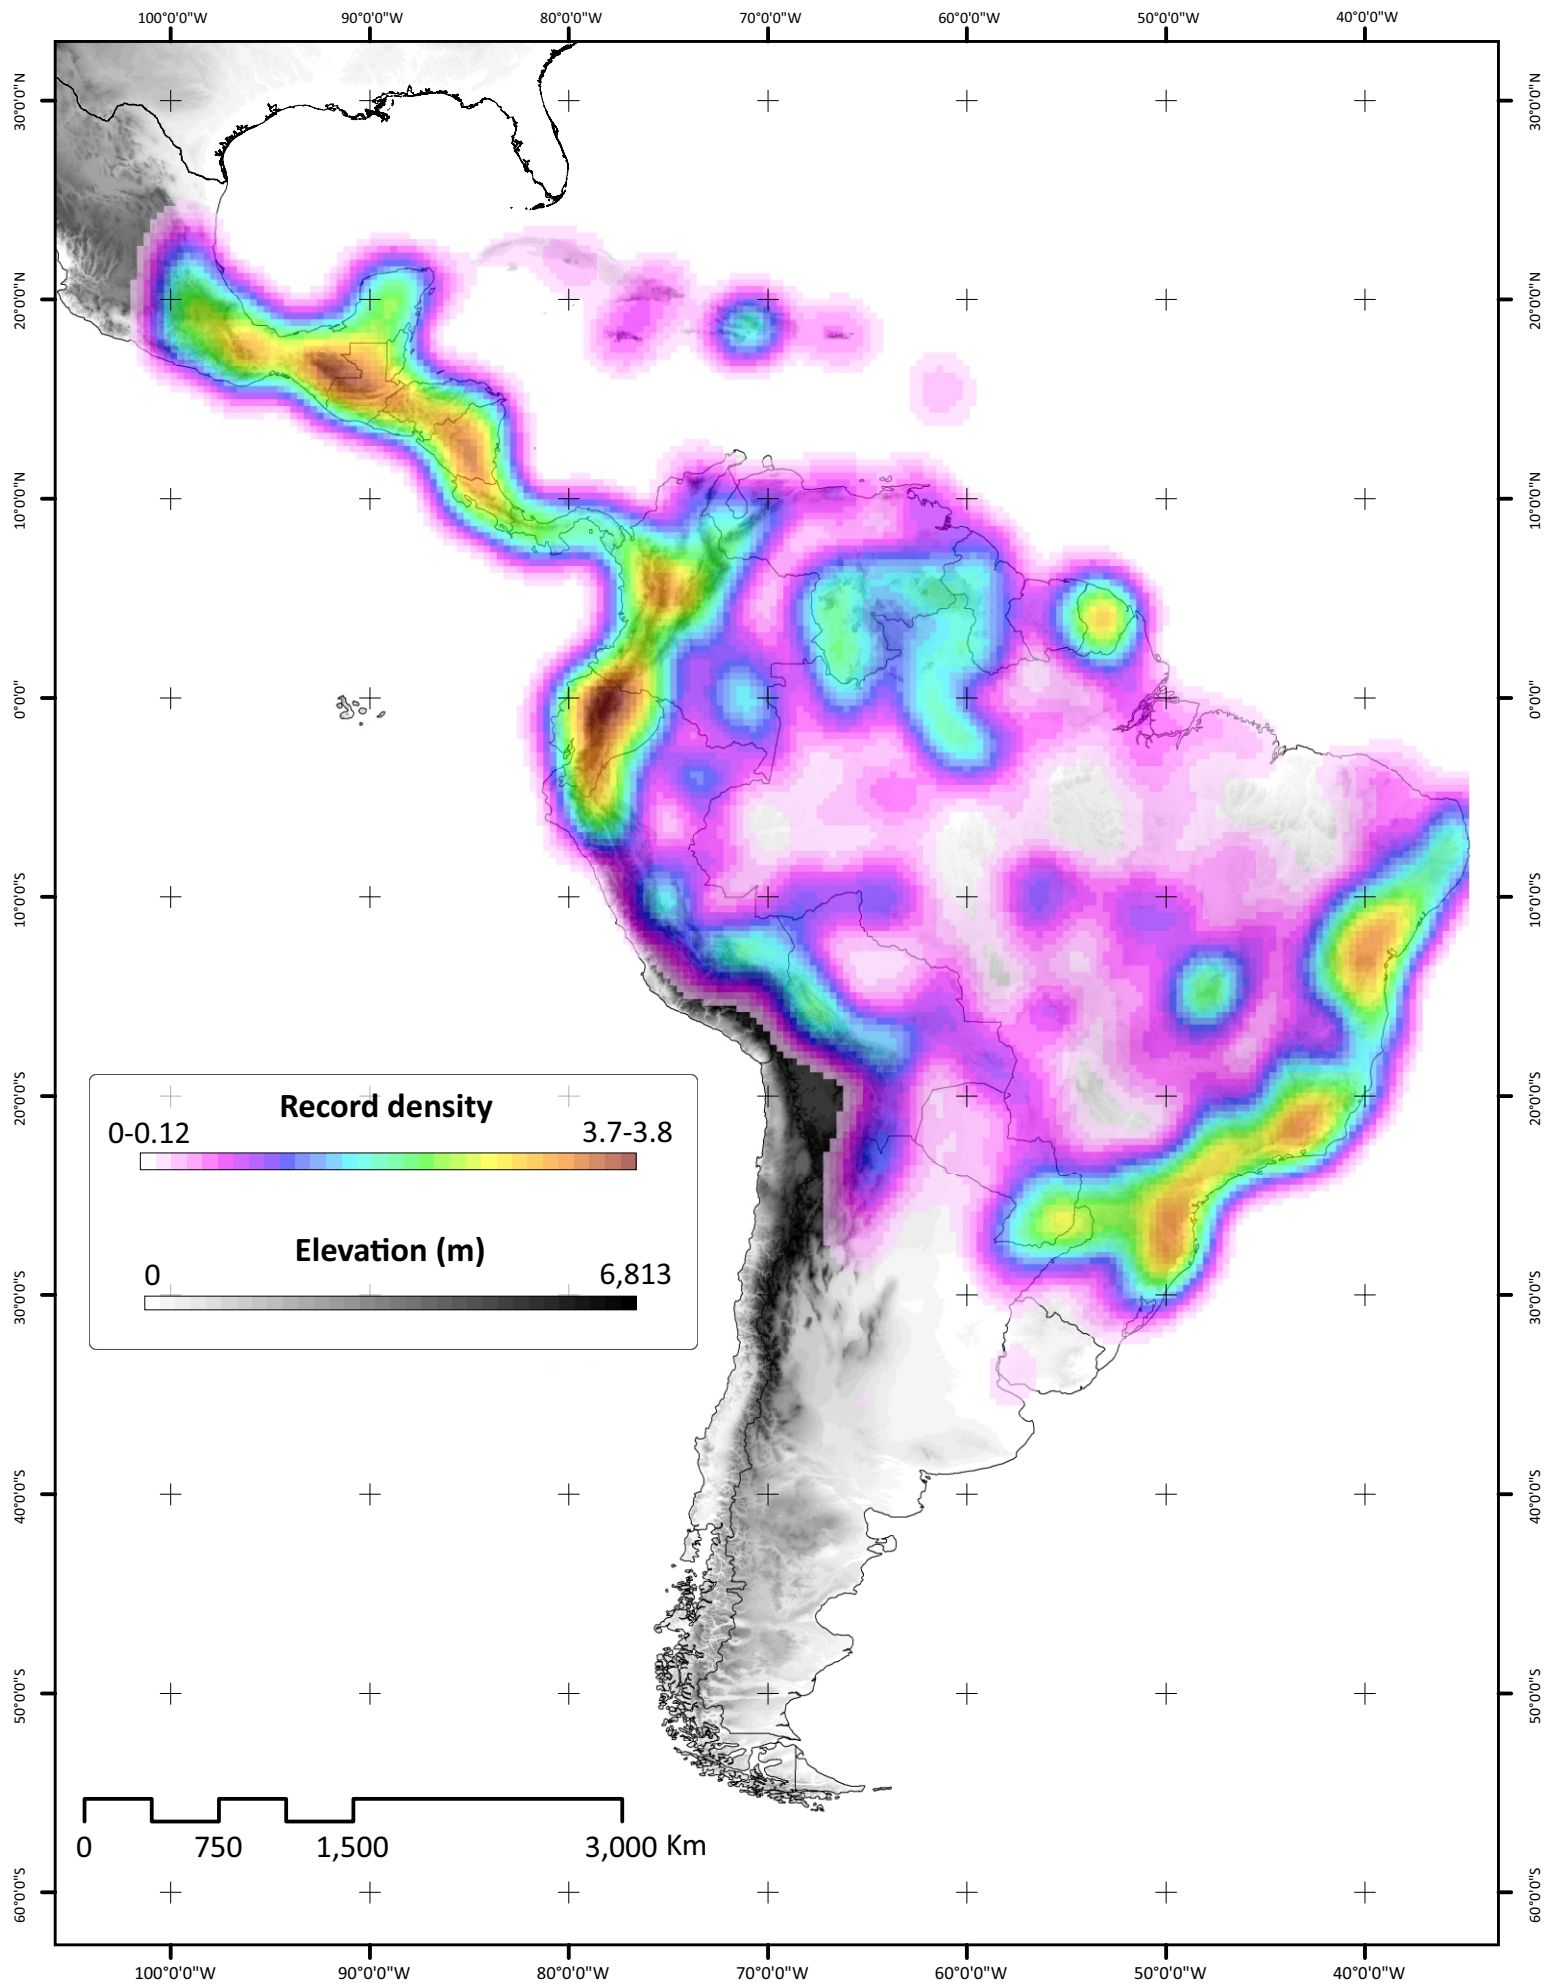

**Figure S27.** Density record map of Cymbidieae (occurrences/grid cell; ~1900 records)



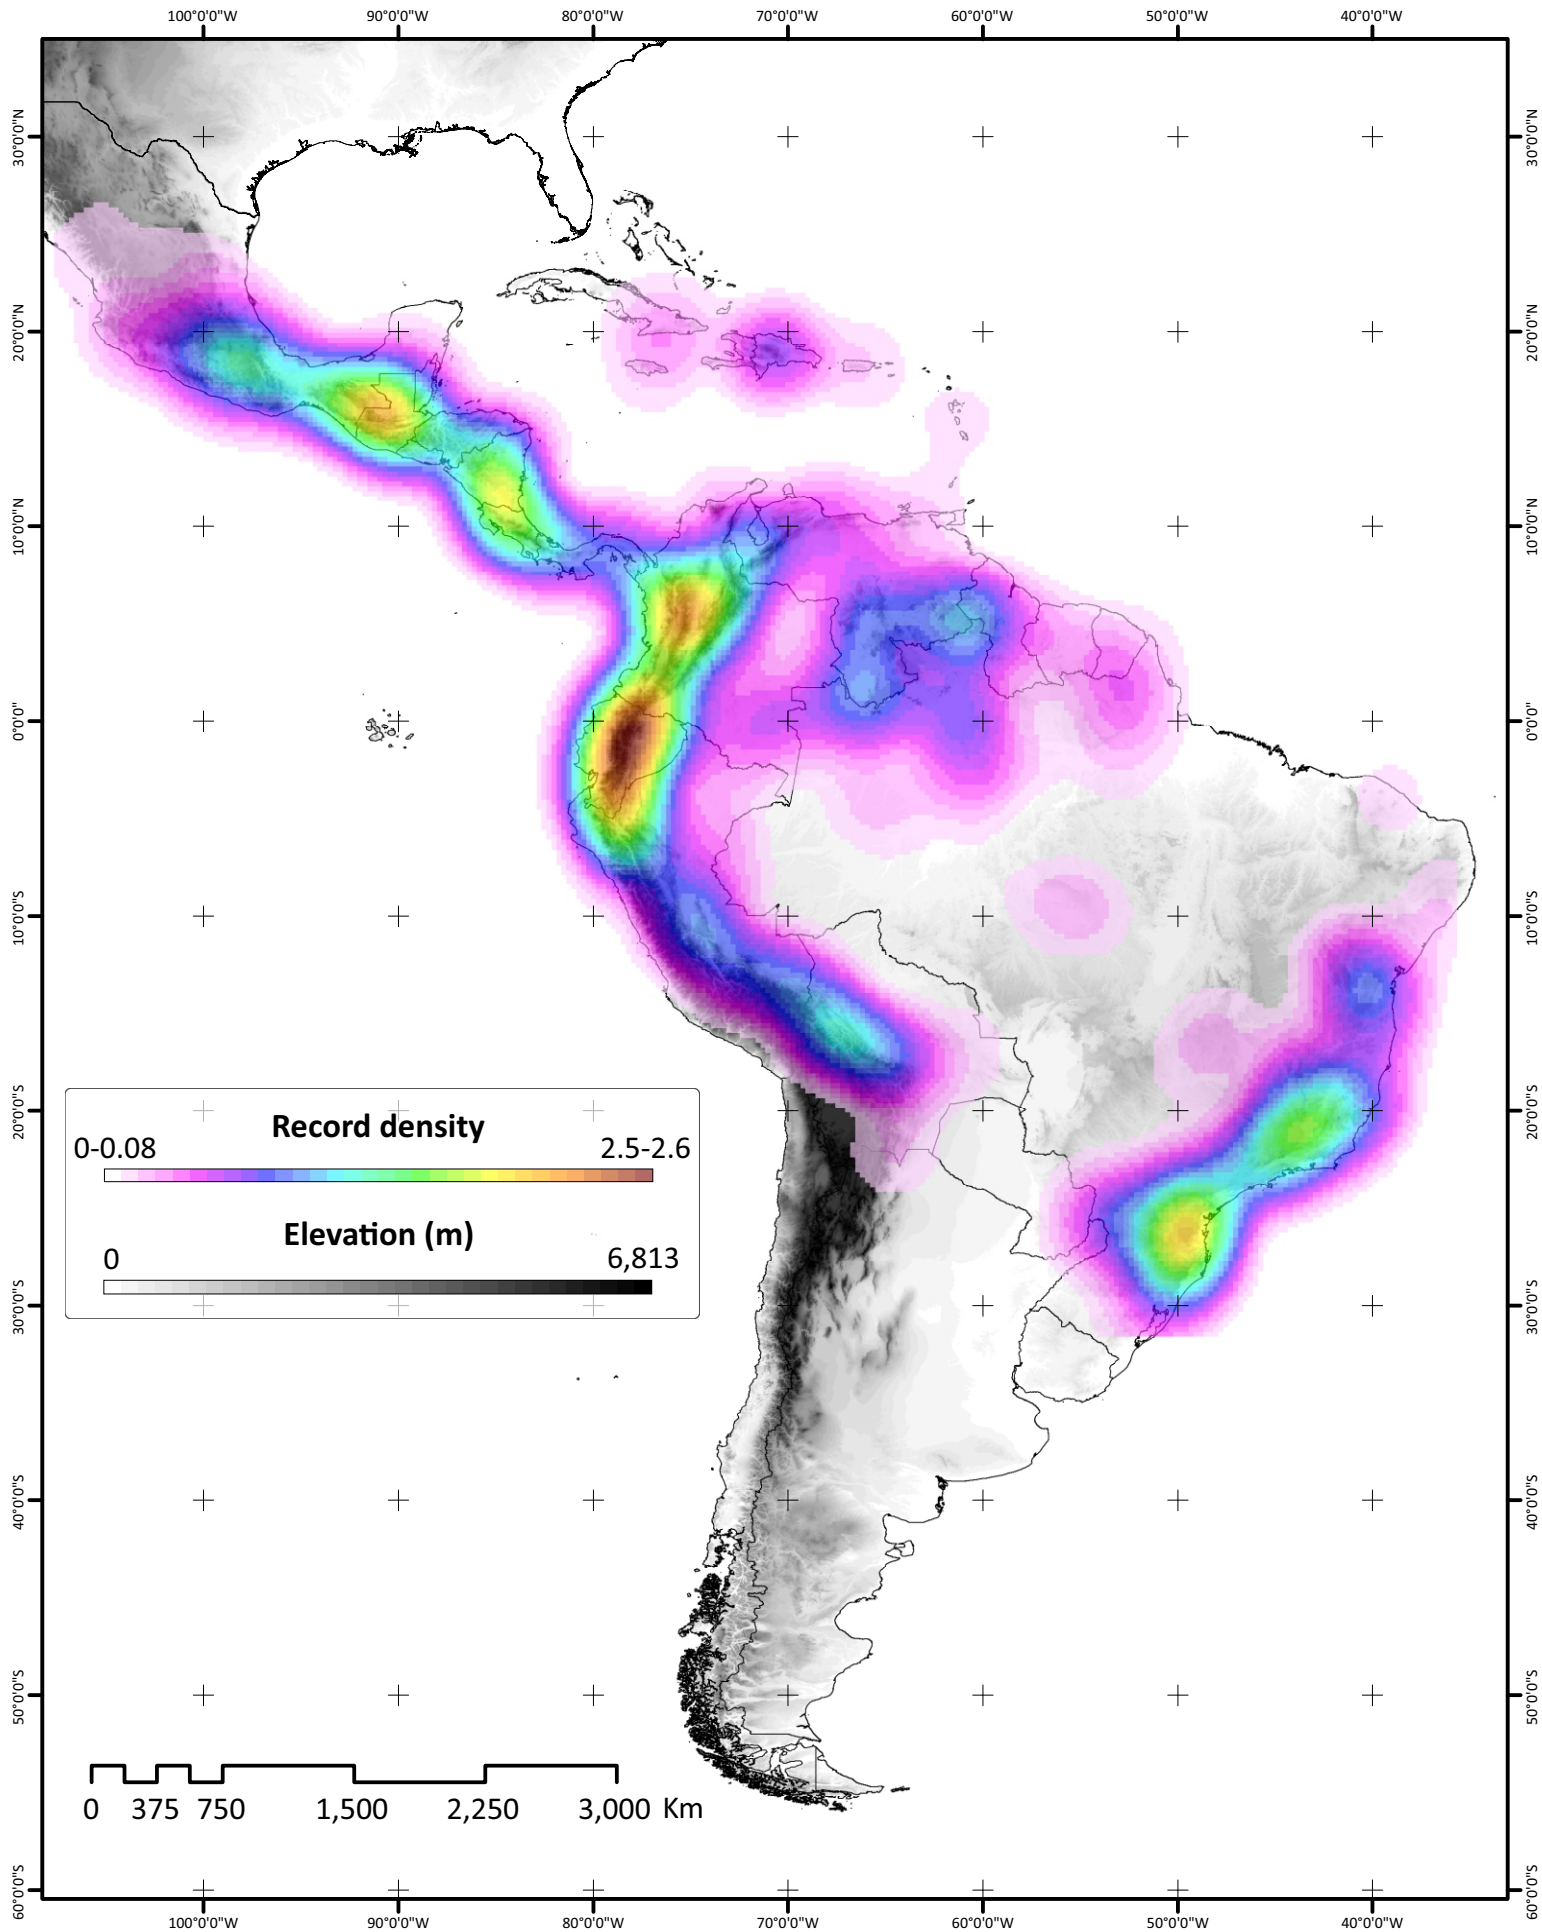

**Figure S28.** Density record map of Pleurothallidinae (occurrences/grid cell; ~700 records)

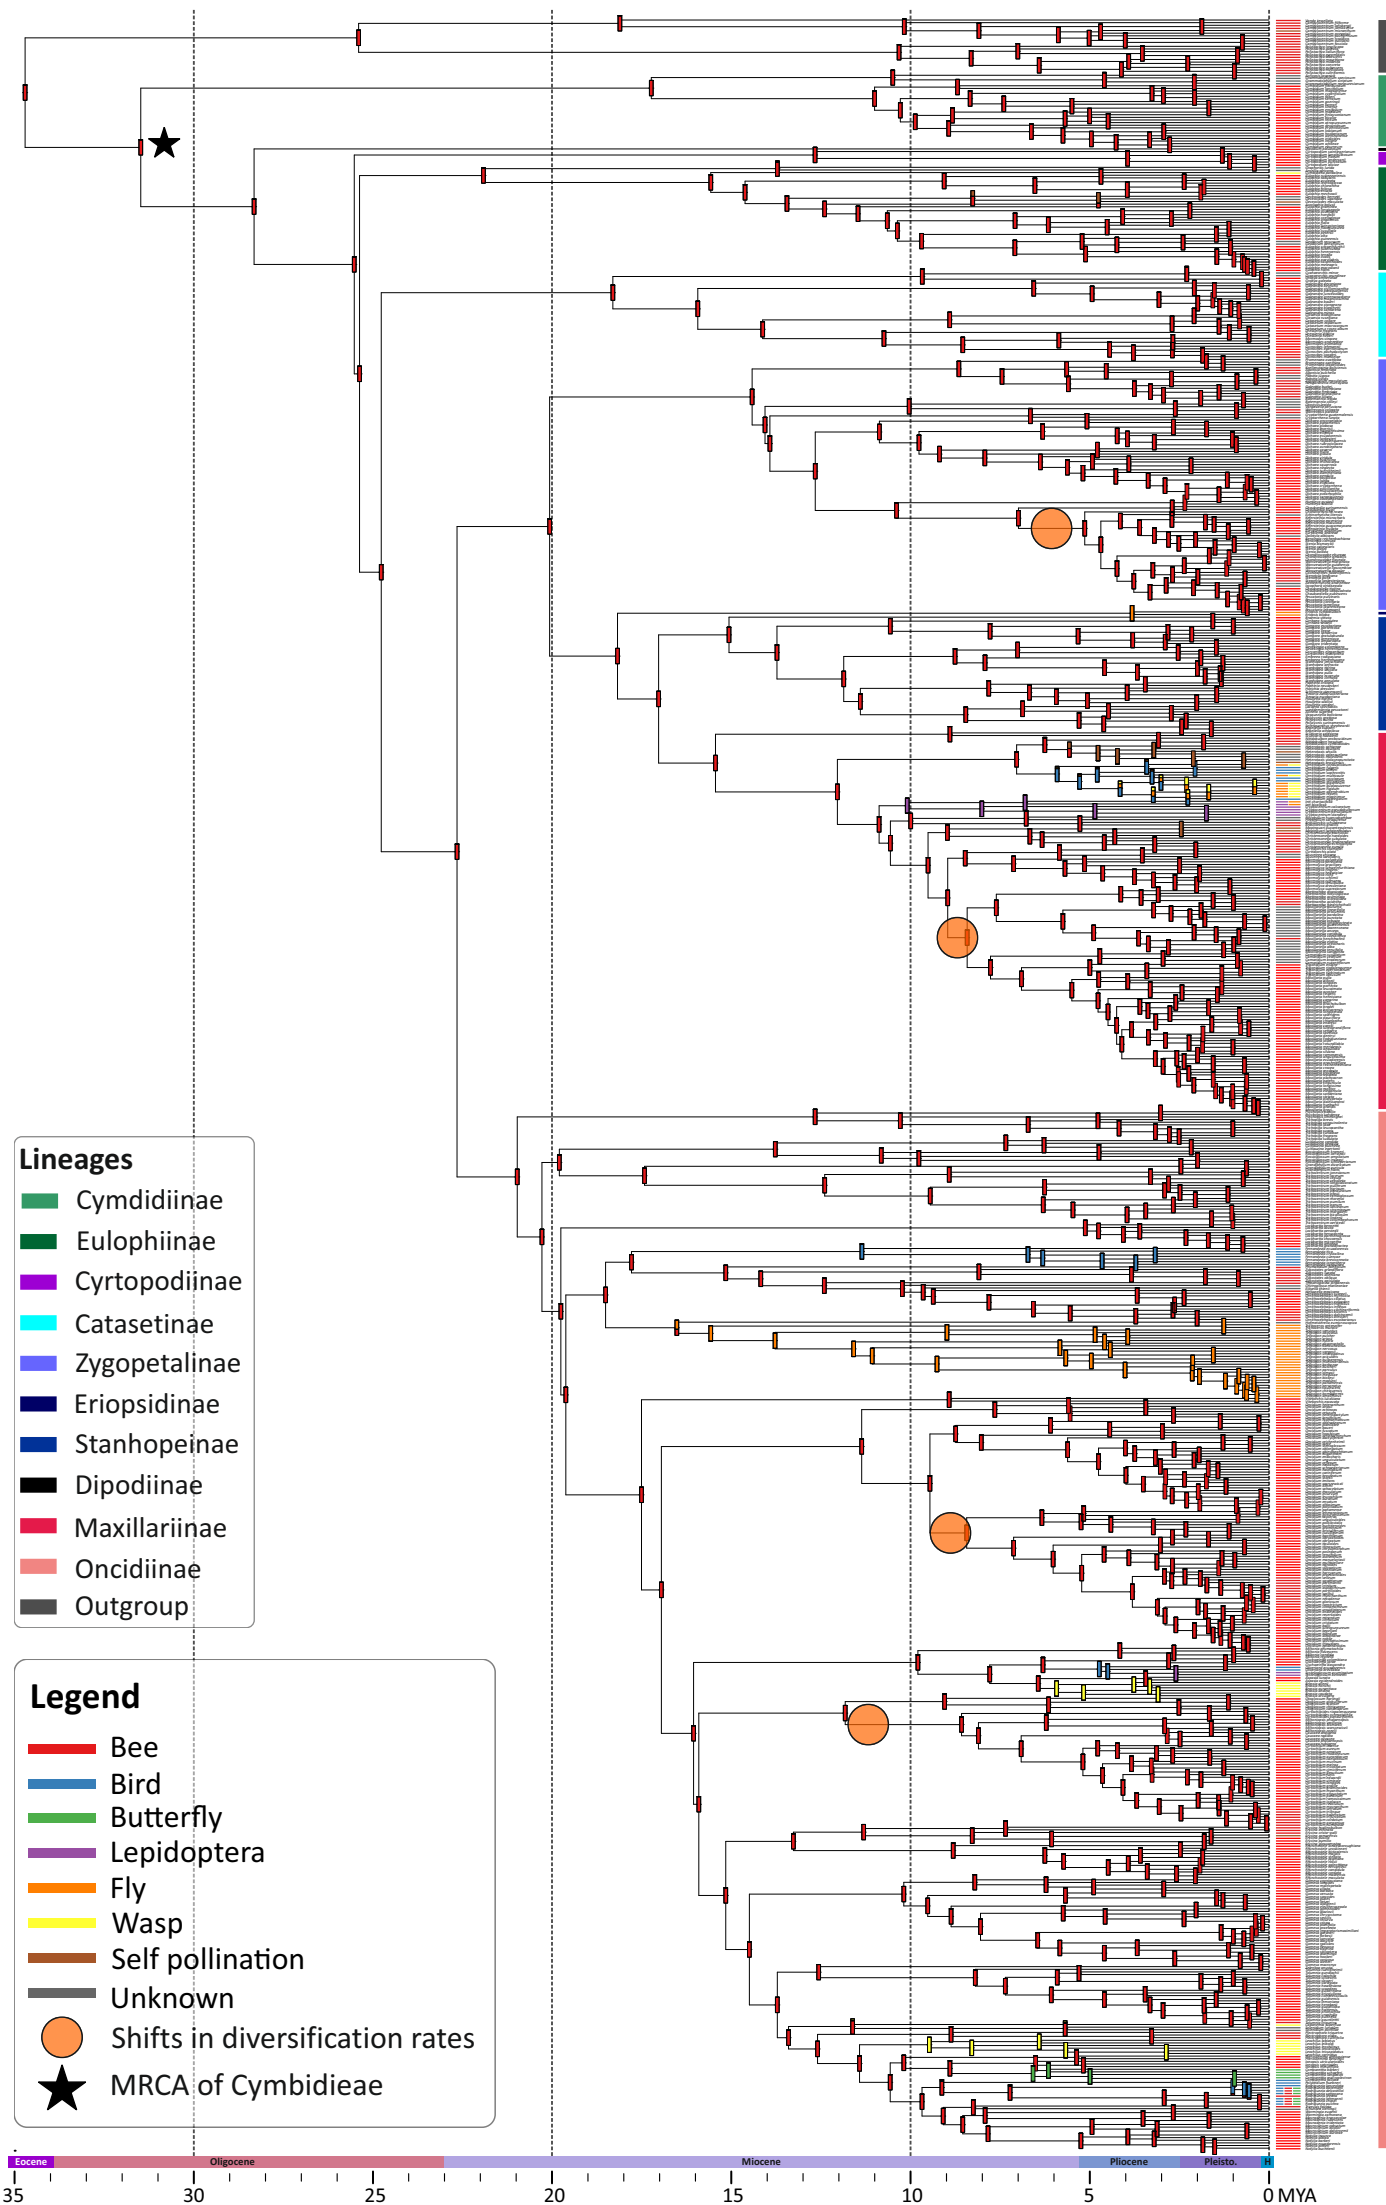

Figure S29. Ancestral character reconstruction of pollination syndromes of Cymbidiinae



**Table S1**

| <b>Scientific Name</b>           | <b>ITS</b> | <b>mat K</b> | <b>psb A</b> | <b>trn L-F</b> | <b>ycfI</b> |
|----------------------------------|------------|--------------|--------------|----------------|-------------|
| <i>Acineta superba</i>           | 745672340  | 13603647     | -            | 745672403      | 564292250   |
| <i>Acriopsis javanica</i>        | 22087059   | 22087027     | -            | -              | -           |
| <i>Acrolophia bolusii</i>        | 570759250  | 659898138    | -            | -              | -           |
| <i>Aetheorhyncha andreettae</i>  | 58042649   | 58200520     | -            | -              | 564291976   |
| <i>Aganisia fimbriata</i>        | 58042723   | 58200668     | -            | 58042625       | 564292012   |
| <i>Aganisia pulchella</i>        | 58042724   | 58200670     | -            | 58042626       | 564292010   |
| <i>Ansellia africana</i>         | 22087058   | 126789232    | -            | -              | -           |
| <i>Aspasia epidendroides</i>     | 13492692   | 15004382     | 224967628    | 13492771       | 224981872   |
| <i>Aspasia lunata</i>            | 126789407  | 126789173    | 224967631    | 223370507      | 224981874   |
| <i>Batemannia colleyi</i>        | 8699095    | 13603575     | -            | 9789375        | -           |
| <i>Batemannia lepida</i>         | 58042707   | 58200636     | -            | -              | 564291850   |
| <i>Benzingia cornuta</i>         | 58042644   | 58200510     | -            | 58042558       | 564292104   |
| <i>Benzingia reichenbachiana</i> | -          | 167889473    | -            | 9789357        | 564291930   |
| <i>Braemia vittata</i>           | 8699132    | 13603649     | -            | 9789412        | 564291880   |
| <i>Brasiliorchis gracilis</i>    | 78095047   | 78094364     | -            | -              | 564292056   |
| <i>Brasiliorchis schunkeana</i>  | 115394628  | 78094524     | -            | -              | 564292046   |
| <i>Brassia allenii</i>           | 13492690   | 15004378     | 224968219    | 13492769       | 224982264   |
| <i>Brassia andina</i>            | 223371620  | 223371109    | 224969098    | 223370549      | 224997968   |
| <i>Brassia arcuigera</i>         | 13492693   | 13603695     | 224968534    | 13492772       | 224982464   |
| <i>Brassia aurantiaca</i>        | 13492689   | 13603681     | 224968552    | 13492768       | 224997606   |
| <i>Brassia caudata</i>           | 13492694   | 167889858    | 224967634    | 13492773       | -           |
| <i>Brassia horichii</i>          | 223371392  | 167889670    | 224968261    | 223370518      | 224997411   |
| <i>Calypso bulbosa</i>           | 21780260   | 154968253    | -            | 33325705       | -           |
| <i>Camaridium bradeorum</i>      | 78095382   | 78094653     | -            | -              | 564292140   |
| <i>Camaridium cucullatum</i>     | 115394610  | 78094433     | -            | -              | 564291912   |
| <i>Camaridium nutantiflorum</i>  | 78095389   | 78094835     | -            | 9789363        | 564292142   |
| <i>Camaridium vestitum</i>       | 78094929   | 167889662    | -            | -              | 564291812   |
| <i>Campylocentrum fasciola</i>   | 28376254   | 28376304     | -            | 27447629       | -           |
| <i>Campylocentrum filiforme</i>  | 28376256   | 28376306     | -            | 28376283       | -           |

|                                      |           |           |           |           |           |
|--------------------------------------|-----------|-----------|-----------|-----------|-----------|
| <i>Campylocentrum jamaicense</i>     | 28376259  | 28376314  | -         | 28376286  | -         |
| <i>Campylocentrum lansbergii</i>     | 28376257  | 28376308  | -         | 28376284  | -         |
| <i>Campylocentrum micranthum</i>     | 27447622  | 167889479 | -         | 27447630  | 187372607 |
| <i>Campylocentrum pachyrrhizum</i>   | 28376261  | 28376316  | -         | 28376287  | -         |
| <i>Campylocentrum poeppigii</i>      | 28376262  | 28376320  | -         | 28376289  | -         |
| <i>Campylocentrum sullivanii</i>     | 71912783  | 71913002  | -         | 71912664  | -         |
| <i>Campylocentrum tyrridion</i>      | 28376265  | 71913004  | -         | 71912665  | -         |
| <i>Capanemia superflua</i>           | 13492720  | 15004438  | 224967305 | 13492799  | 224981662 |
| <i>Catasetum collare</i>             | 937352664 | -         | -         | -         | 937352933 |
| <i>Catasetum expansum</i>            | -         | 564291804 | -         | -         | 564292254 |
| <i>Catasetum macrocarpum</i>         | 937352668 | -         | -         | -         | 937352937 |
| <i>Catasetum x roseoalbum</i>        | 937352671 | -         | -         | -         | 937352939 |
| <i>Caucaea andigena</i>              | 223371540 | 223371023 | 224968834 | -         | 224982660 |
| <i>Caucaea nubigena</i>              | 17182112  | 223371010 | 224968795 | -         | 224982634 |
| <i>Caucaea olivacea</i>              | 17182114  | 223371034 | 224968867 | 17182276  | 224997814 |
| <i>Caucaea phalaenopsis</i>          | 17182108  | 17182215  | 224967296 | 17182277  | 224981658 |
| <i>Caucaea radiata</i>               | 17182107  | 17182217  | 224968120 | 17182278  | 224982198 |
| <i>Chaubardia klugii</i>             | 58042690  | 58200602  | -         | 58042602  | 564291960 |
| <i>Chaubardia surinamensis</i>       | 58042691  | 58200604  | -         | 58042603  | 564291822 |
| <i>Chaubardiella pubescens</i>       | 58042661  | 58200544  | -         | 58042573  | 564292036 |
| <i>Chaubardiella subquadrata</i>     | 58042662  | 58200546  | -         | 58042574  | 564292018 |
| <i>Chaubardiella tigrina</i>         | 58042663  | 58200548  | -         | 58042575  | 564291826 |
| <i>Chondrorhyncha rosea</i>          | 58042631  | 58200484  | -         | -         | 564291974 |
| <i>Chondroscaphe amabilis</i>        | 58042683  | 58200588  | -         | 58042595  | 564291986 |
| <i>Chondroscaphe eburnea</i>         | 58042632  | 58200486  | -         | 58042546  | 564292020 |
| <i>Chondroscaphe flaveola</i>        | 58042686  | 58200594  | -         | 58042598  | 564291844 |
| <i>Christensonella echinophyta</i>   | 78095136  | 156901521 | -         | 156708209 | -         |
| <i>Christensonella ferdinandiana</i> | 78095068  | 78094385  | -         | 156708192 | 564291910 |
| <i>Christensonella nardoides</i>     | 78095274  | 78094558  | -         | 156708219 | 564292108 |
| <i>Christensonella pacholskii</i>    | 78095294  | 78094576  | -         | 156708218 | 564292078 |
| <i>Christensonella pumila</i>        | 78095022  | 78094387  | -         | 156708210 | -         |
| <i>Christensonella subulata</i>      | 78095240  | 78094459  | -         | 156708214 | -         |

|                                     |           |           |           |           |           |
|-------------------------------------|-----------|-----------|-----------|-----------|-----------|
| <i>Chytroglossa marileoniae</i>     | 78095240  | 223371133 | 224969176 | 223370555 | 224982880 |
| <i>Cirrhaea fuscolutea</i>          | 745672356 | 564291786 | -         | 745672416 | 564292220 |
| <i>Cirrhaea seidelii</i>            | 745672358 | 564291748 | -         | 745672417 | 564291870 |
| <i>Cischweinfia colombiana</i>      | 223371485 | 223370970 | 224968648 | -         | 224982536 |
| <i>Cischweinfia dasyandra</i>       | 13492698  | 13603693  | 224967676 | 13492777  | 224981904 |
| <i>Cischweinfia jarae</i>           | 223371382 | 225580278 | 224968222 | -         | 224982266 |
| <i>Clowesia dodsoniana</i>          | -         | 564291802 | -         | -         | 564292252 |
| <i>Clowesia russelliana</i>         | 937352672 | -         | -         | -         | 937352941 |
| <i>Cochleanthes flabelliformis</i>  | 58042682  | 58200586  | -         | 58042594  | 564292230 |
| <i>Coeliopsis hyacinthosma</i>      | 8699096   | 126789105 | 167890792 | 9789376   | 564291878 |
| <i>Comparettia barkeri</i>          | 223371363 | 223370853 | -         | -         | 224982200 |
| <i>Comparettia falcata</i>          | 223371283 | 167889493 | 224969104 | 223370550 | 224982834 |
| <i>Comparettia langkastii</i>       | 223371481 | 225580320 | 224968636 | 223370530 | 224982528 |
| <i>Comparettia macroplectron</i>    | 13492712  | 15004422  | 224967433 | 13492791  | 224981748 |
| <i>Comparettia schaeferi</i>        | 223371358 | 225580260 | 224968099 | 223370515 | 224982184 |
| <i>Coryanthes elegantium</i>        | 8699112   | 13603609  | -         | 9789392   | 564291840 |
| <i>Coryanthes macrantha</i>         | 8699111   | 13603607  | -         | 9789391   | 564291842 |
| <i>Cryptarrhena guatemalensis</i>   | 58042700  | 58200622  | -         | 58042612  | 564292156 |
| <i>Cryptarrhena lunata</i>          | 58042699  | 13603537  | -         | 58042611  | 161597648 |
| <i>Cryptocentrum calcaratum</i>     | 78095160  | 13603549  | -         | 9789362   | -         |
| <i>Cryptocentrum peruvianum</i>     | 78095218  | 78094511  | -         | -         | 564292064 |
| <i>Cryptocentrum pseudobulbosum</i> | 78095219  | 78094586  | -         | -         | -         |
| <i>Cryptocentrum standleyi</i>      | 78095248  | 78094533  | -         | -         | -         |
| <i>Cuitlauzina candida</i>          | 126789418 | 126789190 | 224967487 | 223370563 | 224981786 |
| <i>Cuitlauzina egertonii</i>        | 223371284 | 225580138 | 224967715 | 223370508 | 224981930 |
| <i>Cuitlauzina pendula</i>          | 223371242 | 126789191 | 224967505 | 223370506 | 224981798 |
| <i>Cuitlauzina pulchella</i>        | 223371215 | 223370731 | 224967287 | -         | 224981652 |
| <i>Cyanaeorchis arundinae</i>       | 576890493 | 576890497 | -         | -         | 973601556 |
| <i>Cyanaeorchis minor</i>           | 576890495 | 576890501 | -         | -         | -         |
| <i>Cycnoches cooperi</i>            | 937352678 | 564291806 | -         | -         | 564292256 |
| <i>Cycnoches egertonianum</i>       | 756808976 | 167889956 | -         | -         | 937352955 |
| <i>Cycnoches lehmannii</i>          | 937352689 | 564291736 | -         | -         | 564291860 |

|                                      |           |           |           |           |           |
|--------------------------------------|-----------|-----------|-----------|-----------|-----------|
| <i>Cycnoches manoelae</i>            | 937352692 | 564291712 | -         | -         | 564291824 |
| <i>Cycnoches pachydactylon</i>       | 937352693 | 564291720 | -         | -         | 564291836 |
| <i>Cymbidiella pardalina</i>         | 22087056  | 22087024  | -         | -         | -         |
| <i>Cymbidium atropurpureum</i>       | 22087064  | 22087030  | -         | -         | -         |
| <i>Cymbidium bicolor</i>             | 21427017  | 295147555 | -         | -         | -         |
| <i>Cymbidium cyperifolium</i>        | 21427040  | 619498906 | -         | -         | -         |
| <i>Cymbidium devonianum</i>          | 22087082  | 22087044  | -         | -         | 564291854 |
| <i>Cymbidium eburneum</i>            | 21427030  | 22087035  | -         | -         | 653816625 |
| <i>Cymbidium ensifolium</i>          | 11182035  | 18027045  | -         | -         | -         |
| <i>Cymbidium erythrostylum</i>       | 22087090  | 22087048  | -         | -         | -         |
| <i>Cymbidium faberi</i>              | 11182037  | 619498890 | -         | -         | -         |
| <i>Cymbidium finlaysonianum</i>      | 22087081  | 296916858 | -         | -         | -         |
| <i>Cymbidium floribundum</i>         | 21427019  | 22087032  | -         | -         | -         |
| <i>Cymbidium goeringii</i>           | 11182045  | 22087047  | -         | 480993406 | -         |
| <i>Cymbidium hookerianum</i>         | 21427025  | 22087036  | -         | -         | -         |
| <i>Cymbidium insigne</i>             | 11182032  | 22087041  | -         | -         | -         |
| <i>Cymbidium iridioides</i>          | 21427023  | 22087033  | -         | -         | -         |
| <i>Cymbidium kanran</i>              | 11182041  | 480993344 | -         | 480993407 | -         |
| <i>Cymbidium lancifolium</i>         | 11182047  | 22087040  | -         | -         | -         |
| <i>Cymbidium lowianum</i>            | 11182033  | 22087042  | -         | -         | -         |
| <i>Cymbidium madidum</i>             | 22087060  | 22087038  | -         | -         | -         |
| <i>Cymbidium maguanense</i>          | 619498876 | 619498939 | -         | -         | -         |
| <i>Cymbidium rectum</i>              | 22087061  | 22087028  | -         | -         | -         |
| <i>Cymbidium serratum</i>            | 319890852 | 619498886 | -         | -         | -         |
| <i>Cymbidium sinense</i>             | 11182034  | 22087039  | -         | -         | 482662084 |
| <i>Cymbidium wenshanense</i>         | 21427029  | 619498937 | -         | -         | 653816618 |
| <i>Cymbidium whiteae</i>             | 22087075  | 22087039  | -         | -         | -         |
| <i>Cyrtidiorchis alata</i>           | 78095026  | 78094352  | -         | -         | 564291846 |
| <i>Cyrtidiorchis stumpfleii</i>      | 223371250 | 223370762 | 224967559 | -         | 224981836 |
| <i>Cyrtochiloides ochmatochila</i>   | 17182104  | 17182220  | 224967442 | 17182280  | 224981754 |
| <i>Cyrtochiloides panduriformis</i>  | 17182106  | 167889497 | 224967472 | 17182281  | 224981774 |
| <i>Cyrtochiloides riopalenqueana</i> | 223371403 | 223370899 | 224968339 | -         | 224982344 |

|                                 |           |           |           |           |           |
|---------------------------------|-----------|-----------|-----------|-----------|-----------|
| <i>Cyrtochilum angustatum</i>   | 13492959  | 223370752 | 224967481 | -         | 224981780 |
| <i>Cyrtochilum aurantiacum</i>  | 13492964  | 17182218  | 224968111 | 17182279  | 224982192 |
| <i>Cyrtochilum aureum</i>       | 13492966  | 223371580 | 224967565 | -         | 224982744 |
| <i>Cyrtochilum caespitosum</i>  | 13492965  | 223370851 | 224968114 | -         | 224982194 |
| <i>Cyrtochilum cimiciferum</i>  | 13492731  | 16596775  | 224967269 | 16596779  | 224981640 |
| <i>Cyrtochilum cordatum</i>     | 223371251 | 223370763 | 224967562 | -         | 224981838 |
| <i>Cyrtochilum cumandae</i>     | 223371268 | 223370779 | 224967613 | -         | 224981864 |
| <i>Cyrtochilum edwardii</i>     | 13492728  | 16596773  | 224967550 | 16596776  | 224981830 |
| <i>Cyrtochilum flexuosum</i>    | 223371276 | 223370784 | 224967649 | -         | 224981884 |
| <i>Cyrtochilum funis</i>        | 223371579 | 223371064 | 224968957 | -         | 224982740 |
| <i>Cyrtochilum gargantua</i>    | 13492946  | 223371130 | 224969164 | -         | 224982872 |
| <i>Cyrtochilum gracile</i>      | 13492949  | 223371011 | 224968798 | -         | 224982636 |
| <i>Cyrtochilum graminoides</i>  | 13492967  | 17182228  | 224968150 | 17182284  | 224982218 |
| <i>Cyrtochilum halteratum</i>   | 13492958  | 223370787 | 224967742 | -         | 224981946 |
| <i>Cyrtochilum ioplocon</i>     | 13492951  | 17182232  | 224967763 | 17182286  | 224981960 |
| <i>Cyrtochilum longipes</i>     | 16596795  | 223370901 | 224968345 | -         | 224982348 |
| <i>Cyrtochilum loxense</i>      | 16596794  | 223370797 | 224967838 | -         | 224982008 |
| <i>Cyrtochilum macranthum</i>   | 126789406 | 126789178 | 224967898 | -         | 224982048 |
| <i>Cyrtochilum meirax</i>       | 17182117  | 17182234  | 224968609 | 17182287  | 224982512 |
| <i>Cyrtochilum murinum</i>      | 223371487 | 223370971 | 224968654 | -         | 224982540 |
| <i>Cyrtochilum myanthum</i>     | 13492940  | 223370990 | 224968732 | 223370533 | 224982592 |
| <i>Cyrtochilum ornatum</i>      | 223371532 | 223371015 | 224968810 | -         | 224982644 |
| <i>Cyrtochilum pardinum</i>     | 13492961  | 17182226  | 224967553 | 17182283  | 224981832 |
| <i>Cyrtochilum ramosissimum</i> | 13492956  | 223370746 | 224967445 | -         | 224981756 |
| <i>Cyrtochilum revolutum</i>    | 13492962  | 223370739 | 224967382 | -         | 224981714 |
| <i>Cyrtochilum rhodoneurum</i>  | 126789404 | 126789179 | 224967700 | 16596778  | 224981920 |
| <i>Cyrtochilum serratum</i>     | 223371218 | 45758377  | 224967646 | -         | 224996981 |
| <i>Cyrtochilum tricostatum</i>  | 223371507 | 17182230  | 224967535 | 17182285  | 224981820 |
| <i>Cyrtochilum trifurcatum</i>  | 223371266 | 223370777 | 224967607 | -         | 224981860 |
| <i>Cyrtochilum trilingue</i>    | 223371682 | 223371174 | 224969299 | -         | 224982958 |
| <i>Cyrtochilum viminale</i>     | 223371536 | 223371019 | 224968822 | -         | 224982652 |
| <i>Cyrtopodium aliciae</i>      | 215253654 | 13603713  | 215253674 | -         | -         |



|                                           |           |           |           |           |           |
|-------------------------------------------|-----------|-----------|-----------|-----------|-----------|
| <i>Cyrtopodium andersonii</i>             | 22087057  | 126789236 | -         | -         | 564291862 |
| <i>Cyrtopodium flavum</i>                 | -         | 564291798 | -         | -         | 564292248 |
| <i>Cyrtopodium longibulbosum</i>          | -         | 564291774 | -         | -         | 564292110 |
| <b><i>Cyrtopodium punctatum</i></b>       | 8699164   | 13603713  | -         | 9789444   | KY988621  |
| <b><i>Cyrtopodium saintlegerianum</i></b> | KY988620  | 58200490  | -         | -         | KY988622  |
| <i>Daiotyla albicans</i>                  | 58042634  | 58200490  | -         | 58042548  | 161597650 |
| <i>Dichaea acroblephara</i>               | 161597395 | 161597461 | -         | 161597592 | 161597652 |
| <i>Dichaea ancoraelabia</i>               | 161597399 | 161597465 | -         | 161597594 | 161597654 |
| <i>Dichaea caveroi</i>                    | 161597401 | 126789217 | -         | 161597595 | 161597658 |
| <i>Dichaea cryptarrhena</i>               | 161597406 | 161597479 | -         | 161597600 | 161597668 |
| <i>Dichaea dammeriana</i>                 | 161597408 | 161597483 | -         | 161597602 | 161597672 |
| <i>Dichaea ecuadorensis</i>               | 161597409 | 161597485 | -         | 161597603 | 161597674 |
| <i>Dichaea eligulata</i>                  | 161597411 | 161597489 | -         | 161597604 | 161597676 |
| <i>Dichaea elliptica</i>                  | 161597412 | 161597491 | -         | 161597605 | 161597678 |
| <i>Dichaea fragrantissima</i>             | 161597414 | 161597493 | -         | 161597606 | 161597680 |
| <i>Dichaea glauca</i>                     | 161597416 | 161597497 | -         | 161597607 | 161597684 |
| <i>Dichaea globosa</i>                    | 161597418 | 161597501 | -         | 161597609 | 161597688 |
| <i>Dichaea hystericina</i>                | 161597420 | 161597505 | -         | 161597611 | 161597692 |
| <i>Dichaea lankesteri</i>                 | 161597423 | 161597511 | -         | 161597614 | 161597698 |
| <i>Dichaea longa</i>                      | 161597425 | 161597515 | -         | 161597615 | 161597702 |
| <i>Dichaea morrisii</i>                   | 161597427 | 161597519 | 167890798 | 161597616 | 161597706 |
| <i>Dichaea muyuyacensis</i>               | 161597428 | 161597523 | -         | 161597618 | 161597709 |
| <i>Dichaea neglecta</i>                   | 161597430 | 13603529  | -         | 161597619 | 161597712 |
| <i>Dichaea obovatipetala</i>              | 161597431 | 161597528 | -         | 161597620 | 161597714 |
| <i>Dichaea oxyglossa</i>                  | 161597433 | 161597532 | -         | 161597622 | 161597718 |
| <i>Dichaea panamensis</i>                 | 161597434 | 161597534 | -         | 161597623 | 161597720 |
| <i>Dichaea pendula</i>                    | 161597437 | 161597540 | -         | 161597625 | 161597726 |
| <i>Dichaea poicillantha</i>               | 161597438 | 161597542 | -         | 161597626 | 161597728 |
| <i>Dichaea potamophila</i>                | 161597441 | 161597548 | -         | 161597629 | 161597734 |
| <i>Dichaea riopalenquensis</i>            | 161597444 | 161597552 | -         | 161597631 | 161597736 |
| <i>Dichaea rubroviolacea</i>              | 161597445 | 161597554 | -         | 161597632 | 161597738 |
| <i>Dichaea sarapiquiensis</i>             | 161597446 | 161597556 | -         | 161597633 | 161597740 |

|                                   |           |           |           |           |           |
|-----------------------------------|-----------|-----------|-----------|-----------|-----------|
| <i>Dichaea squarrosa</i>          | 161597453 | 161597570 | -         | 161597640 | 161597754 |
| <i>Dichaea trichocarpa</i>        | 161597455 | 161597574 | -         | 161597642 | 161597758 |
| <i>Dichaea trulla</i>             | 161597456 | 161597576 | -         | 161597643 | 161597760 |
| <i>Dichaea tuerckheimii</i>       | 161597459 | 161597582 | -         | 161597646 | 161597765 |
| <i>Dichaea viridula</i>           | 161597460 | 161597584 | -         | 161597647 | 161597767 |
| <b><i>Dipodium paludosum</i></b>  | KY988619  | 126789234 | -         | -         | KY988623  |
| <i>Dressleria dilecta</i>         | 8699163   | 126789238 | -         | 9789443   | 187372619 |
| <i>Dressleria fragrans</i>        | -         | 564291734 | -         | -         | 564291858 |
| <i>Dressleria helleri</i>         | -         | 564291732 | -         | -         | 564291856 |
| <i>Echinorhyncha litensis</i>     | 58042657  | 58200536  | -         | 58042569  | -         |
| <i>Eloyella thienii</i>           | 84782511  | 84782579  | 224968675 | 84657368  | 224982554 |
| <i>Embreea herrenhusana</i>       | -         | 564291716 | -         | -         | 564291832 |
| <i>Embreea rodigasiana</i>        | 8699110   | 13603605  | -         | 9789390   | 564291830 |
| <i>Epidendrum nocturnum</i>       | 12330827  | 745790796 | -         | 256682035 | -         |
| <i>Eriopsis biloba</i>            | 78095313  | 13603707  | 224968570 | -         | 187372643 |
| <i>Eriopsis rutidobulbon</i>      | 8699161   | 37222993  | -         | 9789441   | -         |
| <i>Erycina crista galli</i>       | 223371470 | 167890000 | 220684420 | 13492790  | 224997632 |
| <i>Erycina echinata</i>           | 13492708  | 15004414  | 224967466 | 13492787  | 224981768 |
| <i>Erycina glossomystax</i>       | 223371607 | 223371094 | 224969053 | 223370545 | 224982802 |
| <i>Erycina hyalinobulbon</i>      | 13492707  | 15004412  | 224967355 | 13492786  | 187372645 |
| <i>Erycina pumilio</i>            | 13492710  | 15004418  | 224967724 | 13492789  | 224981936 |
| <i>Erycina pusilla</i>            | 126789394 | 126789195 | 224967340 | 13492788  | 224981686 |
| <i>Erycina zamorensis</i>         | 223371483 | 223370969 | 224968642 | -         | 224982532 |
| <i>Eulophia aculeata</i>          | 570759290 | 659898101 | -         | -         | -         |
| <i>Eulophia acutilabra</i>        | 570759295 | 659898127 | -         | -         | -         |
| <i>Eulophia alta</i>              | 215253655 | -         | 215253675 | -         | -         |
| <b><i>Eulophia angolensis</i></b> | 570759273 | 659898099 | -         | -         | KY988624  |
| <i>Eulophia calanthoides</i>      | 570759237 | 659898131 | -         | -         | -         |
| <i>Eulophia chlorantha</i>        | 570759280 | 659898149 | -         | -         | -         |
| <i>Eulophia coeloglossa</i>       | 570759302 | 659898095 | -         | -         | -         |
| <i>Eulophia cucullata</i>         | 570759287 | 659898130 | -         | -         | -         |
| <i>Eulophia ensata</i>            | 570759298 | 659898106 | -         | -         | -         |

|                                 |           |           |           |           |           |
|---------------------------------|-----------|-----------|-----------|-----------|-----------|
| <i>Eulophia flava</i>           | 387234530 | 353442294 | -         | -         | -         |
| <i>Eulophia flavopurpurea</i>   | 570759271 | 659898093 | -         | -         | -         |
| <i>Eulophia foliosa</i>         | 570759261 | 659898125 | -         | -         | -         |
| <i>Eulophia graminea</i>        | 21427048  | 223371180 | 224969317 | -         | 224982970 |
| <i>Eulophia guineensis</i>      | 570759301 | 13603715  | -         | 9789445   | 187372647 |
| <i>Eulophia hereroensis</i>     | 570759281 | 659898090 | -         | -         | -         |
| <i>Eulophia hians</i>           | 570759233 | 659898084 | -         | -         | -         |
| <i>Eulophia horsfallii</i>      | 570759263 | 659898133 | -         | -         | -         |
| <i>Eulophia leontoglossa</i>    | 570759282 | 659898157 | -         | -         | -         |
| <i>Eulophia livingstoniana</i>  | 570759284 | 659898081 | -         | -         | -         |
| <i>Eulophia longisepala</i>     | 570759259 | 659898110 | -         | -         | -         |
| <i>Eulophia macowanii</i>       | 570759245 | 659898145 | -         | -         | -         |
| <i>Eulophia mechowii</i>        | 570759255 | 659898126 | -         | -         | -         |
| <i>Eulophia meleagris</i>       | 570759277 | 659898107 | -         | -         | -         |
| <i>Eulophia ovalis</i>          | 570759246 | 659898088 | -         | -         | -         |
| <i>Eulophia parvilabris</i>     | 570759268 | 659898155 | -         | -         | -         |
| <b><i>Eulophia petersii</i></b> | 570759238 | 126789230 | -         | -         | 564291868 |
| <i>Eulophia ruwenzoriensis</i>  | 215253657 | 659898096 | -         | -         | -         |
| <i>Eulophia schweinfurthii</i>  | 570759265 | 659898158 | -         | -         | -         |
| <i>Eulophia tabularis</i>       | 570759248 | 659898116 | -         | -         | -         |
| <i>Eulophia tenella</i>         | 570759241 | 659898144 | -         | -         | -         |
| <i>Eulophia tuberculata</i>     | 570759286 | 659898100 | -         | -         | -         |
| <i>Euryblema anatonum</i>       | 58042650  | 58200522  | -         | 58042562  | -         |
| <i>Euryblema andreae</i>        | 58042665  | 126789210 | -         | 58042577  | -         |
| <i>Fernandezia breviconnata</i> | 223371254 | 223370766 | 224967571 | -         | 224981844 |
| <i>Fernandezia crystallina</i>  | 223371611 | 223371098 | 224969065 | 223370546 | 224997946 |
| <i>Fernandezia cuencaae</i>     | 84782522  | 223371100 | 224969071 | -         | 564292112 |
| <i>Fernandezia ecuadorensis</i> | 223371656 | 223371148 | 224969221 | 223370560 | 224982908 |
| <i>Fernandezia ionanthera</i>   | 223371257 | 13603669  | 224967580 | 9789422   | 224981848 |
| <i>Fernandezia sanguinea</i>    | 223371547 | 223371030 | 224968855 | -         | 224982674 |
| <i>Fernandezia tica</i>         | 223371474 | 223370965 | 224968297 | 223370527 | 224982316 |
| <i>Galeandra baueri</i>         | 215253636 | -         | 215253658 | -         | -         |

|                                 |           |           |           |           |           |
|---------------------------------|-----------|-----------|-----------|-----------|-----------|
| <i>Galeandra beyrichii</i>      | 215253649 | -         | 215253687 | -         | -         |
| <i>Galeandra blanchetii</i>     | 215253638 | -         | 215253659 | -         | -         |
| <i>Galeandra devoniana</i>      | 215253640 | 37222994  | 215253661 | -         | 564291864 |
| <i>Galeandra greenwoodiana</i>  | 215253642 | -         | 215253663 | -         | -         |
| <i>Galeandra junceaoides</i>    | 215253643 | -         | 215253664 | -         | -         |
| <i>Galeandra magnicolumna</i>   | 215253644 | -         | 215253665 | -         | -         |
| <i>Galeandra minax</i>          | 215253645 | -         | 215253666 | -         | -         |
| <i>Galeandra paraguayensis</i>  | 215253651 | -         | 215253671 | -         | -         |
| <i>Galeandra santarena</i>      | 215253641 | -         | 215253662 | -         | -         |
| <i>Galeandra stangeana</i>      | 215253646 | -         | 215253667 | -         | -         |
| <i>Galeandra styllomisantha</i> | 215253652 | -         | 215253672 | -         | -         |
| <i>Galeottia burkei</i>         | 58042704  | 58200630  | -         | -         | 564292004 |
| <i>Galeottia ciliata</i>        | 58042706  | 58200634  | -         | -         | 564292006 |
| <i>Galeottia colombiana</i>     | 58042703  | 58200628  | -         | -         | 564291998 |
| <i>Galeottia fimbriata</i>      | 58042709  | 58200640  | -         | 58042613  | -         |
| <i>Galeottia grandiflora</i>    | 58042710  | 58200642  | -         | 58042614  | -         |
| <i>Geodorum densiflorum</i>     | 21427047  | 353442306 | -         | -         | -         |
| <i>Geodorum recurvum</i>        | 675912725 | 675912487 | -         | 675912354 | -         |
| <i>Gomesa barbata</i>           | 223371452 | 223370945 | 224968507 | -         | 224982446 |
| <i>Gomesa chrysostoma</i>       | 223371429 | 223370920 | 224968432 | -         | 224982398 |
| <i>Gomesa ciliata</i>           | 223371238 | 223370751 | 224967475 | -         | 224981776 |
| <i>Gomesa cogniauxiana</i>      | 223371430 | 223370921 | 224968435 | -         | 224982400 |
| <i>Gomesa concolor</i>          | 223371344 | 223370837 | 224968060 | -         | 224982156 |
| <i>Gomesa crispa</i>            | 223371436 | 223370927 | 224968453 | -         | 224982412 |
| <i>Gomesa dasytyle</i>          | 13492722  | 15004442  | 224967517 | 13492801  | 224996901 |
| <i>Gomesa eleutherosepala</i>   | 223371224 | 223370738 | 224967367 | 223370502 | 224981704 |
| <i>Gomesa flexuosa</i>          | 13492723  | 15004444  | 166244770 | 13492802  | 224981742 |
| <i>Gomesa forbesii</i>          | 223371450 | 223370943 | 224968501 | -         | 224982442 |
| <i>Gomesa gardneri</i>          | 223371691 | 223371184 | 224969329 | -         | 224982978 |
| <i>Gomesa glaziovii</i>         | 223371454 | 223370947 | 224968513 | -         | 224982450 |
| <i>Gomesa gomezoides</i>        | -         | 15004445  | 224967499 | 13492803  | 224996887 |
| <i>Gomesa hookeri</i>           | 223371448 | 223370941 | 224968495 | -         | 224982438 |

|                                      |           |           |           |           |           |
|--------------------------------------|-----------|-----------|-----------|-----------|-----------|
| <i>Gomesa imperatorismaximiliani</i> | 223371228 | 223370741 | 224967400 | -         | 224981726 |
| <i>Gomesa lietzei</i>                | 223371646 | 223371138 | 224969191 | 223370558 | 224982890 |
| <i>Gomesa longipes</i>               | 223371407 | 223370903 | 224968351 | -         | 224982352 |
| <i>Gomesa macronyx</i>               | 223371220 | 223370734 | 224967328 | -         | 224981678 |
| <i>Gomesa macropetala</i>            | 223371445 | 223370936 | 224968480 | -         | 224982428 |
| <i>Gomesa planifolia</i>             | 126789402 | 126789169 | 224967325 | 13492804  | 224981676 |
| <i>Gomesa praetexta</i>              | 223371433 | 223370924 | 224968444 | -         | 224982406 |
| <i>Gomesa pubes</i>                  | 223371211 | 225580068 | 224967263 | -         | 224981636 |
| <i>Gomesa radicans</i>               | 223371645 | 223371137 | 224969188 | 223370557 | 224982888 |
| <i>Gomesa recurva</i>                | 223371456 | 223370950 | 224968522 | -         | 224982456 |
| <i>Gomesa sarcodes</i>               | 223371443 | 223370934 | 224968474 | -         | 224982424 |
| <i>Gomesa sessilis</i>               | 223371455 | 223370948 | 224968516 | -         | 224982452 |
| <i>Gomesa spilloptera</i>            | 223371449 | 223370942 | 224968498 | -         | 224982440 |
| <i>Gomesa varicosa</i>               | 223371453 | 223370946 | 224968510 | -         | 224982448 |
| <i>Gomesa venusta</i>                | 223371379 | 223370871 | 224968207 | -         | 224982256 |
| <i>Gomesa viperina</i>               | 223371368 | 223370862 | 224968171 | -         | 224982232 |
| <i>Gomesa warmingii</i>              | 223371247 | 223370760 | 224967544 | -         | 224981826 |
| <i>Gomesa welteri</i>                | 223371437 | 223370928 | 224968456 | -         | 224982414 |
| <i>Gomesa widgrenii</i>              | 223371679 | 223371171 | 224969290 | -         | 224982954 |
| <i>Gongora amparoana</i>             | 8699137   | 13603659  | -         | 9789417   | 564291938 |
| <i>Gongora armeniaca</i>             | 8699138   | 13603661  | -         | 9789418   | 564291872 |
| <i>Gongora escobariana</i>           | 8699135   | 13603655  | -         | 9789415   | 564291898 |
| <i>Gongora gratulabunda</i>          | 8699134   | 13603653  | -         | 9789414   | -         |
| <i>Gongora ilense</i>                | 8699136   | 13603657  | -         | 9789416   | 564292222 |
| <i>Gongora portentosa</i>            | 8699141   | 13603667  | -         | 9789421   | 564291886 |
| <i>Gongora sphaerica</i>             | 8699140   | 13603665  | -         | 9789420   | 564291866 |
| <i>Gongora tridentata</i>            | 8699139   | 13603663  | -         | 9789419   | 564291950 |
| <i>Grammatophyllum measuresianum</i> | -         | 223370967 | -         | -         | -         |
| <i>Grammatophyllum scriptum</i>      | -         | 22087022  | -         | -         | -         |
| <i>Grammatophyllum speciosum</i>     | 22087055  | 13603717  | -         | 22087023  | -         |
| <i>Grandiphyllum auricula</i>        | 223371684 | 223371176 | 220684492 | 223370529 | 224982962 |
| <i>Grandiphyllum divaricatum</i>     | 223371476 | 223370967 | 224968615 | 223370528 | 224982516 |



|                                      |           |           |           |           |           |
|--------------------------------------|-----------|-----------|-----------|-----------|-----------|
| <i>Grandiphyllum hians</i>           | 223371223 | 223370737 | 224967352 | -         | 224981694 |
| <i>Graphorkis lurida</i>             | -         | 37222996  | -         | -         | -         |
| <i>Grobya amherstiae</i>             | 215253656 | -         | -         | -         | -         |
| <i>Grobya galeata</i>                | 22087054  | 22087022  | -         | -         | -         |
| <i>Heterotaxis brasiliensis</i>      | 78095094  | 78094412  | -         | -         | -         |
| <i>Heterotaxis equitans</i>          | 758294107 | 758293985 | -         | -         | 564292100 |
| <i>Heterotaxis maleolens</i>         | 78094917  | 167889651 | -         | -         | 564292176 |
| <i>Heterotaxis santanae</i>          | 115394627 | 78094912  | -         | -         | 564292178 |
| <i>Heterotaxis sessilis</i>          | 78095349  | 78094801  | -         | -         | 564292114 |
| <i>Heterotaxis valenzuelana</i>      | 115394630 | 78094425  | -         | -         | 564292224 |
| <i>Heterotaxis violaceopunctata</i>  | 58042727  | 13603553  | -         | 58042628  | 161597769 |
| <i>Hintonella mexicana</i>           | 223371468 | 223370961 | 224967988 | 223370525 | 224982108 |
| <i>Hofmeisterella eumicroscopica</i> | 13492681  | 15004360  | 224967436 | 13492760  | 224981750 |
| <i>Horichia dressleri</i>            | 8699114   | 13603613  | -         | 9789394   | 564291884 |
| <i>Houlletia sanderi</i>             | 8699123   | 13603631  | -         | 9789403   | 564291956 |
| <i>Houlletia tigrina</i>             | 8699122   | 13603629  | -         | 9789402   | 564291954 |
| <i>Houlletia wallisii</i>            | 8699121   | 13603627  | -         | 9789401   | -         |
| <i>Huntleya gustavi</i>              | 58042694  | 58200610  | -         | 58042606  | -         |
| <i>Huntleya wallisii</i>             | 58042692  | 161597586 | -         | 58042604  | 161597771 |
| <i>Inti bicallosa</i>                | 758294140 | 758293929 | -         | -         | 564292038 |
| <i>Inti chartacifolia</i>            | 78094920  | 78094725  | -         | -         | 187372657 |
| <i>Ionopsis minutiflora</i>          | 13492719  | 15004436  | 224967685 | 13492798  | 224981910 |
| <i>Ionopsis satyrioides</i>          | 13492718  | 15004434  | 224967682 | 13492797  | 224981908 |
| <i>Ionopsis utricularioides</i>      | 13492717  | 15004432  | 224967343 | 13492796  | 224981688 |
| <i>Ixyophora viridisepala</i>        | 58042659  | 58200540  | -         | 58042571  | 564292040 |
| <i>Kefersteinia excentrica</i>       | 58042651  | 167889576 | -         | 58042563  | 564292218 |
| <i>Kefersteinia guacamayoana</i>     | 58042652  | 58200526  | -         | 58042564  | -         |
| <i>Kefersteinia maculosa</i>         | 58042655  | 58200532  | -         | 58042567  | 564292048 |
| <i>Kefersteinia microcharis</i>      | 58042654  | 167889580 | -         | 58042566  | 564291820 |
| <i>Kefersteinia trullata</i>         | 58042653  | 58200528  | -         | 58042565  | 564292050 |
| <i>Kegeliella atropilosa</i>         | 745672343 | 126789205 | -         | 745672405 | 564291888 |
| <i>Kegeliella kupperi</i>            | 8699116   | 13603617  | -         | 9789396   | 564291882 |

|                                   |           |           |           |           |           |
|-----------------------------------|-----------|-----------|-----------|-----------|-----------|
| <i>Koellensteinia boliviensis</i> | 58042721  | 58200664  | -         | 9789359   | -         |
| <i>Lacaena spectabilis</i>        | 745672348 | 126789206 | -         | 745672410 | 564291896 |
| <i>Leochilus carinatus</i>        | 126789401 | 126789167 | 224967284 | 223370499 | 224981650 |
| <i>Leochilus labiatus</i>         | 223371355 | 225580258 | 224968090 | -         | 224982176 |
| <i>Leochilus leiboldi</i>         | 223371280 | 223370786 | 224967694 | 223370524 | 224981916 |
| <i>Leochilus leochilinus</i>      | 223371232 | 225580092 | 224967415 | 223370503 | 224981736 |
| <i>Leochilus oncidoides</i>       | 223371231 | 223370744 | 224967412 | -         | 224981734 |
| <i>Leochilus tricuspidadus</i>    | 223371662 | 223371154 | 224969239 | -         | 224982920 |
| <i>Lockhartia acuta</i>           | 223371196 | 223370715 | 224967216 | -         | 224981602 |
| <i>Lockhartia amoena</i>          | 126789419 | 126789101 | 224967189 | 13492765  | 224981584 |
| <i>Lockhartia bennettii</i>       | 223371192 | 223370711 | 224967204 | 223370540 | 224981594 |
| <i>Lockhartia chocoensis</i>      | 223371189 | 167889604 | 224967195 | -         | 224981588 |
| <i>Lockhartia grandibractea</i>   | 223371194 | 223370713 | 224967210 | -         | 224981598 |
| <i>Lockhartia hercodonta</i>      | 223371188 | 167889606 | 224967192 | -         | 224981586 |
| <i>Lockhartia micrantha</i>       | 223371193 | 223370712 | 224967207 | 223370494 | 224981596 |
| <i>Lockhartia oerstedii</i>       | 13492685  | 13603677  | 224967213 | 13492764  | 224981600 |
| <i>Lockhartia parthenoglossa</i>  | 223371199 | 223370719 | 224967227 | -         | 224981610 |
| <i>Lueddemannia pescatorei</i>    | 8699128   | 13603641  | -         | 9789408   | 564292180 |
| <i>Lycomormium fiskei</i>         | 8699097   | 223370860 | -         | -         | -         |
| <i>Macradenia brassavolae</i>     | 223371241 | 225580104 | 224967502 | -         | 224981796 |
| <i>Macradenia rubescens</i>       | 223371366 | 223370860 | 224968162 | 223370517 | 224982226 |
| <i>Macradenia tridentata</i>      | 223371426 | 223370917 | 224968423 | -         | 224982392 |
| <i>Macroclinium aurorae</i>       | 223371647 | 223371139 | 224969194 | -         | 224982892 |
| <i>Macroclinium bicolor</i>       | 13492721  | 223371093 | 224967299 | 13492800  | 224981660 |
| <i>Macroclinium dalstroemii</i>   | 223371606 | 225580266 | 224969050 | -         | 224982800 |
| <i>Macroclinium robustum</i>      | 223371365 | 225580266 | 224968129 | -         | 224982204 |
| <i>Mapinguari auyantepuiensis</i> | 78095270  | 78094555  | -         | -         | 564292068 |
| <i>Mapinguari longipetiolatus</i> | 78095168  | 78094472  | -         | -         | 564291814 |
| <i>Maxillaria acostae</i>         | 78094973  | 78094328  | -         | -         | 564292144 |
| <i>Maxillaria aequiloba</i>       | 78095212  | 78094509  | -         | -         | -         |
| <i>Maxillaria angustissima</i>    | 78094993  | 78094686  | -         | -         | 564292162 |
| <i>Maxillaria arachnitiflora</i>  | 78095002  | 167889634 | -         | -         | -         |

|                                    |           |           |   |   |           |
|------------------------------------|-----------|-----------|---|---|-----------|
| <i>Maxillaria bolivarensis</i>     | 78095280  | 78094563  | - | - | -         |
| <i>Maxillaria brachybulbon</i>     | 78095201  | 167889636 | - | - | 564292032 |
| <i>Maxillaria bradei</i>           | 78095088  | 78094406  | - | - | -         |
| <i>Maxillaria canarina</i>         | 269930073 | 564291790 | - | - | 564292240 |
| <i>Maxillaria carolii</i>          | 78095512  | 78094773  | - | - | -         |
| <i>Maxillaria chionantha</i>       | 78094947  | 78094310  | - | - | 564292148 |
| <i>Maxillaria crocea</i>           | 78095042  | 78094359  | - | - | -         |
| <i>Maxillaria dalessandroi</i>     | 78095305  | 78094585  | - | - | 564292202 |
| <i>Maxillaria dillonii</i>         | 78095373  | 564291780 | - | - | 564292196 |
| <i>Maxillaria ecuadorensis</i>     | 78095198  | 78094496  | - | - | 564292160 |
| <i>Maxillaria elegantula</i>       | 78094963  | 78094321  | - | - | 564292124 |
| <i>Maxillaria endresii</i>         | 78094949  | 78094311  | - | - | -         |
| <i>Maxillaria fractiflexa</i>      | 78095013  | 78094342  | - | - | -         |
| <i>Maxillaria gentryi</i>          | 78095286  | 78094570  | - | - | 564292154 |
| <i>Maxillaria grandis</i>          | 78095307  | 78094587  | - | - | -         |
| <i>Maxillaria grayi</i>            | 78095486  | 564291782 | - | - | 564292198 |
| <i>Maxillaria henchmannii</i>      | 78095238  | 78094523  | - | - | -         |
| <i>Maxillaria hennisiana</i>       | 78094952  | 78094643  | - | - | 564292122 |
| <i>Maxillaria huebschii</i>        | 78095509  | 78094770  | - | - | -         |
| <i>Maxillaria jostii</i>           | 78095031  | 78094355  | - | - | -         |
| <i>Maxillaria lepidota</i>         | 78095302  | 78094582  | - | - | -         |
| <i>Maxillaria leucaimata</i>       | 78095046  | 78094363  | - | - | -         |
| <i>Maxillaria longipes</i>         | 78095016  | 78094345  | - | - | 564292172 |
| <i>Maxillaria longipetala</i>      | 78095506  | 78094879  | - | - | 564292026 |
| <i>Maxillaria longissima</i>       | 78095208  | 78094504  | - | - | 564292168 |
| <i>Maxillaria lueri</i>            | 78094942  | 78094306  | - | - | 564292132 |
| <i>Maxillaria luteograndiflora</i> | 78095131  | 78094447  | - | - | -         |
| <i>Maxillaria meridensis</i>       | 78094976  | 78094495  | - | - | 564292090 |
| <i>Maxillaria modesta</i>          | 78095134  | 78094451  | - | - | -         |
| <i>Maxillaria molitor</i>          | 78095308  | 78094588  | - | - | -         |
| <i>Maxillaria pachyacron</i>       | 78094960  | 78094318  | - | - | -         |
| <i>Maxillaria patens</i>           | 78095200  | 78094497  | - | - | -         |

|                                     |           |           |   |   |           |
|-------------------------------------|-----------|-----------|---|---|-----------|
| <i>Maxillaria pauciflora</i>        | 78095032  | 78094356  | - | - | -         |
| <i>Maxillaria platypetala</i>       | 78095497  | 78094758  | - | - | 564292208 |
| <i>Maxillaria porrecta</i>          | 78094924  | 78094301  | - | - | 564292128 |
| <i>Maxillaria pulla</i>             | 78095320  | 78094597  | - | - | 564292092 |
| <i>Maxillaria ramonensis</i>        | 78095038  | 78094857  | - | - | -         |
| <i>Maxillaria reichenheimiana</i>   | 78094992  | 78094672  | - | - | -         |
| <i>Maxillaria ringens</i>           | 78094986  | 78094833  | - | - | -         |
| <i>Maxillaria rodrigueziana</i>     | 78095000  | 167889666 | - | - | -         |
| <i>Maxillaria rotundilabia</i>      | 78095345  | 78094618  | - | - | -         |
| <i>Maxillaria sanderiana</i>        | 78095210  | 78094506  | - | - | -         |
| <i>Maxillaria setigera</i>          | 78095082  | 78094399  | - | - | -         |
| <i>Maxillaria silvana</i>           | 78095455  | 78094722  | - | - | 564292170 |
| <i>Maxillaria speciosa</i>          | 78095014  | 78094343  | - | - | -         |
| <i>Maxillaria splendens</i>         | 607840125 | 607840037 | - | - | 564292216 |
| <i>Maxillaria striata</i>           | 78095206  | 78094502  | - | - | -         |
| <i>Maxillaria virguncula</i>        | 78095443  | 78094708  | - | - | 564292094 |
| <i>Maxillariella alba</i>           | 78095110  | 167889632 | - | - | -         |
| <i>Maxillariella anceps</i>         | 78095457  | 78094910  | - | - | -         |
| <i>Maxillariella caespitifica</i>   | 78094974  | 78094822  | - | - | -         |
| <i>Maxillariella diuturna</i>       | 78095469  | 78094914  | - | - | -         |
| <i>Maxillariella elatior</i>        | 115394612 | 78094522  | - | - | 564292044 |
| <i>Maxillariella guareimensis</i>   | 78095504  | 78094765  | - | - | -         |
| <i>Maxillariella lawrenceana</i>    | 78095390  | 78094661  | - | - | -         |
| <i>Maxillariella linearifolia</i>   | 78095035  | 78094854  | - | - | -         |
| <i>Maxillariella longibracteata</i> | 78095292  | 78094575  | - | - | -         |
| <i>Maxillariella oreocharis</i>     | 78094943  | 78094307  | - | - | 564292150 |
| <i>Maxillariella pardalina</i>      | 78095004  | 78094333  | - | - | -         |
| <i>Maxillariella procurrens</i>     | 115394622 | 78094507  | - | - | 564292080 |
| <i>Maxillariella punctata</i>       | 78095494  | 126789222 | - | - | 564292186 |
| <i>Maxillariella robusta</i>        | 78095131  | 78094447  | - | - | -         |
| <i>Maxillariella sanguinea</i>      | 78095020  | 78094849  | - | - | -         |
| <i>Maxillariella tenuifolia</i>     | 78095221  | 78094512  | - | - | -         |

|                                   |           |           |           |           |           |
|-----------------------------------|-----------|-----------|-----------|-----------|-----------|
| <i>Maxillariella variabilis</i>   | 115394631 | 126789220 | -         | -         | 564292166 |
| <i>Miltonia candida</i>           | 13492688  | 126789259 | -         | 13492767  | 224981664 |
| <i>Miltonia flavescens</i>        | 13492687  | 15004372  | 224967652 | 13492766  | 224981886 |
| <i>Miltonia phymatochila</i>      | 223371243 | 223371136 | 224967514 | 223370556 | 224981804 |
| <i>Miltonia regnellii</i>         | 126789410 | 13603679  | 224968546 | 9789427   | 224982472 |
| <i>Miltoniopsis bismarkii</i>     | 17182101  | 17182212  | 224968684 | 17182275  | 224982560 |
| <i>Miltoniopsis phalaenopsis</i>  | 13492938  | 17182210  | 224967850 | 17182274  | 224982016 |
| <i>Miltoniopsis roezlii</i>       | 223371692 | 223371186 | 224969332 | 223370564 | 224998124 |
| <i>Miltoniopsis vexillaria</i>    | 13492937  | 223370748 | 224967457 | -         | 224981764 |
| <i>Miltoniopsis warscewiczii</i>  | 13492727  | 15004451  | 224967278 | 13492806  | 224981646 |
| <i>Mormodes andreetae</i>         | 862568769 | 126789104 | -         | -         | -         |
| <i>Mormodes aromatica</i>         | 756808981 | 37223003  | -         | -         | -         |
| <i>Mormodes vinacea</i>           | -         | 126789225 | -         | -         | -         |
| <i>Mormolyca dressleriana</i>     | 758294097 | 758293875 | -         | -         | -         |
| <i>Mormolyca gracilipes</i>       | 758294100 | 758293833 | -         | -         | -         |
| <i>Mormolyca hedwigiae</i>        | 758294114 | 758293829 | -         | -         | -         |
| <i>Mormolyca peruviana</i>        | 78095337  | 78094610  | -         | -         | 564292106 |
| <i>Mormolyca polyphylla</i>       | 758294168 | 758293885 | -         | -         | 564292182 |
| <i>Mormolyca richii</i>           | 758294160 | 758293849 | -         | -         | 564292072 |
| <i>Mormolyca ringens</i>          | 758294098 | 126789243 | -         | -         | 564292190 |
| <i>Mormolyca rufescens</i>        | 115394626 | 607840043 | -         | -         | -         |
| <i>Mormolyca schlimii</i>         | 758294150 | 126789218 | -         | -         | 564292076 |
| <i>Mormolyca schweinfurthiana</i> | 78095173  | 78094475  | -         | -         | -         |
| <i>Mormolyca suareziorum</i>      | 758294122 | 78094728  | -         | -         | -         |
| <i>Mormolyca tenuibulba</i>       | 758294101 | 758293827 | -         | -         | -         |
| <i>Neogardneria murrayana</i>     | 58042714  | 58200650  | -         | 58042617  | 564292008 |
| <i>Nitidobulbon cymbidioides</i>  | 78094926  | 78094802  | -         | -         | -         |
| <i>Nitidobulbon nasutum</i>       | 78095108  | 78094424  | -         | -         | 564292042 |
| <i>Nitidobulbon proboscideum</i>  | 78094918  | 758293861 | -         | -         | 564291810 |
| <i>Notylia albida</i>             | 223371634 | 223371126 | 224969152 | -         | 224982864 |
| <i>Notylia barkeri</i>            | 13492716  | 15004430  | 224967272 | 13492795  | 224981642 |
| <i>Notylia buchtienii</i>         | 223371364 | 225580264 | 224968126 | -         | 224982202 |

|                                |           |           |           |           |           |
|--------------------------------|-----------|-----------|-----------|-----------|-----------|
| <i>Notylia ecuadorensis</i>    | 223371498 | 223370982 | 224968708 | 223370532 | 224982576 |
| <i>Notylia incurva</i>         | 343527126 | 323388393 | -         | -         | -         |
| <i>Notylia pittieri</i>        | 223371202 | 223370722 | 224967236 | -         | 224981616 |
| <i>Oeceoclades bernetii</i>    | 570759278 | 659898092 | -         | -         | -         |
| <i>Oeceoclades maculata</i>    | 570759258 | 384584652 | -         | -         | 564292242 |
| <i>Oeceoclades ugandae</i>     | 570759240 | 659898123 | -         | -         | -         |
| <i>Oliveriana brevilabia</i>   | 223371342 | 126789175 | 224968054 | 223370514 | 224982152 |
| <i>Oliveriana ecuadorensis</i> | 223371425 | -         | 224968420 | -         | 224982390 |
| <i>Oncidium alexandrae</i>     | 13492877  | 223370798 | 224967775 | -         | 224981968 |
| <i>Oncidium altissimum</i>     | 13492894  | 225580224 | 224967937 | 223370512 | 224982074 |
| <i>Oncidium andradeanum</i>    | 223371619 | 223371108 | 224969095 | -         | 224982828 |
| <i>Oncidium ariasii</i>        | 223371592 | 223371079 | 224969008 | -         | 224982772 |
| <i>Oncidium aristuliferum</i>  | 13492932  | 223370858 | 224968153 | -         | 224982220 |
| <i>Oncidium aspidorhinum</i>   | 13492861  | 223370802 | 224967886 | -         | 224982040 |
| <i>Oncidium astranthum</i>     | 13492871  | 225580204 | 224967883 | -         | 224982038 |
| <i>Oncidium aurarium</i>       | 223371375 | 223370867 | 224968195 | -         | 224982248 |
| <i>Oncidium baueri</i>         | 13492895  | 223371038 | 224967949 | -         | 224982082 |
| <i>Oncidium blandum</i>        | 13492879  | 225580150 | 224967739 | -         | 224981944 |
| <i>Oncidium boothianum</i>     | 223371556 | 223371039 | 224967706 | -         | 224982692 |
| <i>Oncidium bracteatum</i>     | 13492914  | 225580136 | 224967706 | -         | 224981924 |
| <i>Oncidium buchtienoides</i>  | 126789426 | 126789188 | 224968156 | -         | 224982222 |
| <i>Oncidium cariniferum</i>    | 13492887  | 225580188 | 224967832 | -         | 224982004 |
| <i>Oncidium chrysomorphum</i>  | 13492888  | 17182242  | 224967844 | 17182291  | 224982012 |
| <i>Oncidium cinnamomeum</i>    | 13492846  | 225580166 | 224967781 | -         | 224981972 |
| <i>Oncidium cirrhosum</i>      | 13492850  | 223371072 | 224967373 | -         | 224981708 |
| <i>Oncidium constrictum</i>    | 13492855  | 225580174 | 224967811 | -         | 224981990 |
| <i>Oncidium crinitum</i>       | 13492856  | 225580210 | 224967907 | -         | 224982054 |
| <i>Oncidium cristatum</i>      | 13492859  | 225580216 | 224967916 | -         | 224982060 |
| <i>Oncidium crocidipterum</i>  | 13492880  | 225580130 | 224967703 | -         | 224981922 |
| <i>Oncidium cuculligerum</i>   | 13492934  | 223370857 | 224968144 | -         | 224982214 |
| <i>Oncidium dactyliferum</i>   | 223371267 | 223370778 | 224967610 | -         | 224981862 |
| <i>Oncidium echinops</i>       | 223371391 | 223371096 | 224968258 | -         | 224982290 |



|                                  |           |           |           |           |           |
|----------------------------------|-----------|-----------|-----------|-----------|-----------|
| <i>Oncidium endocharis</i>       | 13492907  | 223370759 | 224967541 | -         | 224981824 |
| <i>Oncidium ensatum</i>          | 13492921  | 225580234 | 224967952 | -         | 224982084 |
| <i>Oncidium epidendroides</i>    | 13492869  | 223370823 | 224967796 | 223370534 | 224981980 |
| <i>Oncidium fuscatum</i>         | 13492900  | 126789117 | 224967391 | -         | 224981720 |
| <i>Oncidium ghiesbreghtianum</i> | 126789424 | 126789182 | 224967427 | 13492813  | 224981744 |
| <i>Oncidium gloriosum</i>        | 13492857  | 225580212 | 224967910 | -         | 224982056 |
| <i>Oncidium gramineum</i>        | 13492927  | 223371005 | 224967991 | -         | 224982110 |
| <i>Oncidium hallii</i>           | 13492867  | 223370710 | 224967198 | -         | 224981954 |
| <i>Oncidium harryanum</i>        | 126789422 | 126789189 | 224967358 | 13492819  | 187372666 |
| <i>Oncidium hastatum</i>         | 13492904  | 223370808 | 224967904 | -         | 224982052 |
| <i>Oncidium hastilabium</i>      | 13492922  | 223370736 | 224967337 | -         | 224981684 |
| <i>Oncidium heteranthum</i>      | 13492917  | 223371041 | 224968888 | -         | 224982696 |
| <i>Oncidium heterodactylum</i>   | 223371537 | 223371020 | 224968825 | -         | 224982654 |
| <i>Oncidium hyphaematicum</i>    | 13492916  | 223370816 | 224967970 | 223370513 | 224982096 |
| <i>Oncidium imitans</i>          | 223371203 | 223370723 | 224967239 | -         | 224981618 |
| <i>Oncidium incurvum</i>         | 13492915  | 223371131 | 224968588 | -         | 224982498 |
| <i>Oncidium isthmi</i>           | 13492896  | 223371047 | 224967940 | -         | 224982076 |
| <i>Oncidium kegeljani</i>        | 223371553 | 223371036 | 224968873 | -         | 224982686 |
| <i>Oncidium laeve</i>            | 13492884  | 225580082 | 224967346 | -         | 224981690 |
| <i>Oncidium lancifolium</i>      | 223371590 | 223371077 | 224969002 | -         | 224982768 |
| <i>Oncidium lehmannianum</i>     | 223371416 | 223370912 | 224968378 | 223370520 | 224982368 |
| <i>Oncidium leucochilum</i>      | 13492736  | 15004469  | 224967313 | 13492815  | 224981668 |
| <i>Oncidium lindleyoides</i>     | 13492843  | 223370750 | 224967469 | -         | 224981770 |
| <i>Oncidium luteopurpureum</i>   | 13492849  | 223370753 | 224967490 | -         | 224981784 |
| <i>Oncidium maculatum</i>        | 13492898  | 225580230 | 224967946 | -         | 224982080 |
| <i>Oncidium manuelariasii</i>    | 223371406 | 223370902 | 224968348 | -         | 224982350 |
| <i>Oncidium mirandum</i>         | 13492864  | 225580218 | 224967919 | -         | 224982062 |
| <i>Oncidium multistellare</i>    | 126789421 | 126789186 | 224967508 | 13492821  | 224981800 |
| <i>Oncidium nevadense</i>        | 13492841  | 225580110 | 224967547 | -         | 224981828 |
| <i>Oncidium nobile</i>           | 13492875  | 225580176 | 224967814 | -         | 224981992 |
| <i>Oncidium noezlianum</i>       | 126789420 | 126789184 | 224967385 | 13492820  | 224981716 |
| <i>Oncidium oblongatum</i>       | 13492912  | 225580220 | 224967925 | -         | 224982066 |

|                                 |           |           |           |          |           |
|---------------------------------|-----------|-----------|-----------|----------|-----------|
| <i>Oncidium obryzatoides</i>    | 223371421 | 167890002 | 224968399 | -        | 224982382 |
| <i>Oncidium obryzatum</i>       | 13492909  | 223371062 | 224968951 | -        | 224982736 |
| <i>Oncidium oliganthum</i>      | 13492890  | 225580072 | 224967281 | -        | 224981648 |
| <i>Oncidium ornithorhynchum</i> | 13492737  | 13603689  | 224967661 | 13492816 | 224981894 |
| <i>Oncidium oxyceras</i>        | 223371517 | 223371001 | 224968765 | -        | 224982614 |
| <i>Oncidium panamense</i>       | 223371666 | 223371158 | 224969251 | -        | 224982928 |
| <i>Oncidium picturatissimum</i> | 223371574 | 223371059 | 224968942 | -        | 224982730 |
| <i>Oncidium planilabre</i>      | 13492910  | 225580208 | 224967448 | -        | 224997163 |
| <i>Oncidium poikilostalix</i>   | 13492743  | 15004483  | 224967364 | 13492822 | 224981702 |
| <i>Oncidium polycladium</i>     | 223371652 | 167889688 | 224969209 | -        | 224982900 |
| <i>Oncidium portilloides</i>    | 13492862  | 225580252 | 224968048 | -        | 224982148 |
| <i>Oncidium portmannii</i>      | 13492874  | 223370995 | 224967769 | -        | 224981964 |
| <i>Oncidium povedanum</i>       | 13492863  | 225580274 | 224968192 | -        | 224982246 |
| <i>Oncidium praestanoides</i>   | 13492851  | 225580246 | 224968042 | -        | 224982144 |
| <i>Oncidium reflexum</i>        | 13492891  | 223370756 | 224967511 | -        | 224981802 |
| <i>Oncidium reichenheimii</i>   | 13492733  | 15004463  | 224967316 | 13492812 | 224981670 |
| <i>Oncidium retusum</i>         | 13492913  | 223370809 | 224967293 | -        | 224981656 |
| <i>Oncidium reversoides</i>     | 13492848  | 225580186 | 224967829 | -        | 224982002 |
| <i>Oncidium rhynchanthum</i>    | 13492854  | 223370754 | 224967493 | -        | 224981788 |
| <i>Oncidium schroederianum</i>  | 13492886  | 223370958 | 224967871 | -        | 224982030 |
| <i>Oncidium spectatissimum</i>  | 13492872  | 225580184 | 224967826 | -        | 224982000 |
| <i>Oncidium sphacelatum</i>     | 13492735  | 15004467  | 224967664 | 13492814 | 224981896 |
| <i>Oncidium stenoglossum</i>    | 13492885  | 225580084 | 224967349 | -        | 224981692 |
| <i>Oncidium storkii</i>         | 223371422 | 167890004 | 224968402 | -        | 224982384 |
| <i>Oncidium tenuifolium</i>     | 223371404 | 223370900 | 224968342 | -        | 224982346 |
| <i>Oncidium tigroides</i>       | 13492889  | 126789187 | 224968921 | -        | 224982718 |
| <i>Oncidium tipuloides</i>      | 223371328 | 223370822 | 224967997 | -        | 224982114 |
| <i>Oncidium toachicum</i>       | 13492918  | 225580100 | 224967484 | -        | 224981782 |
| <i>Oncidium trinasutum</i>      | 223371341 | 225580254 | 224968051 | -        | 224982150 |
| <i>Oncidium tripudians</i>      | 13492852  | 225580180 | 224967820 | -        | 224981996 |
| <i>Oncidium unguiculatum</i>    | 223371492 | 225580332 | 224968681 | -        | 224982558 |
| <i>Oncidium unguiculoides</i>   | 13492926  | 225580190 | 224967835 | -        | 224982006 |

|                                        |           |           |           |           |           |
|----------------------------------------|-----------|-----------|-----------|-----------|-----------|
| <i>Oncidium velleum</i>                | 13492866  | 225580182 | 224967823 | -         | 224981998 |
| <i>Oncidium vulcanicum</i>             | 13492836  | 225580148 | 224967736 | -         | 224982130 |
| <i>Oncidium wallisii</i>               | 13492853  | 225580088 | 224967379 | -         | 224981712 |
| <i>Oncidium warszewiczii</i>           | 223371237 | 225580098 | 224967463 | -         | 224981772 |
| <i>Oncidium wyattianum</i>             | 13492842  | 225580192 | 224967847 | -         | 224982014 |
| <i>Ornithidium adendrobium</i>         | 78095153  | 167889630 | -         | -         | -         |
| <i>Ornithidium aggregatum</i>          | 523586034 | 523586244 | -         | -         | 564292102 |
| <i>Ornithidium coccineum</i>           | 115394608 | 78094814  | -         | -         | 564292192 |
| <i>Ornithidium conduplicatum</i>       | 78094980  | 78094828  | -         | -         | -         |
| <i>Ornithidium fulgens</i>             | 78095164  | 167889647 | -         | -         | 564292134 |
| <i>Ornithidium giganteum</i>           | 78095199  | 78094542  | -         | -         | 564292058 |
| <i>Ornithidium gualaquizense</i>       | 93359519  | 93359537  | -         | -         | -         |
| <i>Ornithidium mapiriense</i>          | 78095510  | 78094771  | -         | -         | -         |
| <i>Ornithidium multicaule</i>          | 78095496  | 78094757  | -         | -         | 564292206 |
| <i>Ornithidium pittieri</i>            | 78095378  | 78094905  | -         | -         | -         |
| <i>Ornithidium repens</i>              | 78095009  | 78094338  | -         | -         | -         |
| <i>Ornithidium rigidum</i>             | 78095055  | 78094372  | -         | -         | -         |
| <i>Ornithidium serrulatum</i>          | 78095021  | 78094850  | -         | -         | 564292184 |
| <i>Ornithidium sophronitis</i>         | 78095249  | 78094534  | -         | -         | 564292054 |
| <i>Ornithocephalus bicornis</i>        | 223371585 | 223371070 | 224968978 | 223370544 | 224982754 |
| <i>Ornithocephalus ciliatus</i>        | 223371582 | 223371067 | 224968969 | -         | 224997882 |
| <i>Ornithocephalus cochleariformis</i> | 223371651 | 223371143 | 224969206 | -         | 224998040 |
| <i>Ornithocephalus dalstroemii</i>     | 223371206 | 223371103 | 224969116 | -         | 224997980 |
| <i>Ornithocephalus dressleri</i>       | 223371615 | 223371104 | 224969083 | 223370547 | 224997958 |
| <i>Ornithocephalus escobarianus</i>    | 13492680  | 15004358  | 224967245 | 13492759  | 224981622 |
| <i>Ornithocephalus inflexus</i>        | 13492678  | 13603671  | 224967201 | 13492757  | 224981592 |
| <i>Ornithocephalus iridifolius</i>     | 84782516  | 223370854 | 224968132 | -         | 224982206 |
| <i>Ornithocephalus myrticola</i>       | 84782518  | 223370855 | 224968135 | -         | 224982208 |
| <i>Ornithocephalus polyodon</i>        | 223371586 | 223371071 | 224968981 | -         | 224982756 |
| <i>Ornithocephalus suarezii</i>        | 223371581 | 223371066 | 224968966 | 223370543 | 224982746 |
| <i>Otoglossum candelabrum</i>          | 223371631 | 223371121 | 224969137 | 223370553 | 224997994 |
| <i>Otoglossum chiriquense</i>          | 13492732  | 15004461  | 224967376 | 13492811  | 224981710 |

|                                 |           |           |           |           |           |
|---------------------------------|-----------|-----------|-----------|-----------|-----------|
| <i>Otoglossum globuliferum</i>  | 126789412 | 126789170 | 224967233 | 17182290  | 224981614 |
| <i>Otoglossum harlingii</i>     | 13492971  | 17182238  | 224968693 | 17182289  | 224982566 |
| <i>Otoglossum scansor</i>       | 223371649 | 223371141 | 224969200 | -         | 224982896 |
| <i>Otostylis lepida</i>         | 58042726  | 58200674  | -         | -         | 564292002 |
| <i>Pabstia jugosa</i>           | 58042716  | 58200654  | -         | 58042619  | -         |
| <i>Pabstia viridis</i>          | 58042708  | 58200638  | -         | -         | -         |
| <i>Paphinia cristata</i>        | 169303232 | 745672375 | -         | 745672411 | 187372672 |
| <i>Paphinia neudeckeri</i>      | 8699127   | 13603639  | -         | 9789407   | 564291946 |
| <i>Peristeria elata</i>         | 745672341 | 13603581  | -         | -         | -         |
| <i>Peristeria lindenii</i>      | 8699099   | 13603583  | -         | -         | -         |
| <i>Pescatoria cerina</i>        | 58042669  | 167889692 | -         | 58042581  | 564291972 |
| <i>Pescatoria coronaria</i>     | 58042671  | 58200564  | -         | 58042583  | 564291940 |
| <i>Pescatoria lamellosa</i>     | 58042670  | 58200562  | -         | 58042582  | 564291942 |
| <i>Pescatoria lawrenceana</i>   | 126789430 | 126789212 | -         | 58042578  | 564291990 |
| <i>Pescatoria lehmannii</i>     | 13492754  | 126789213 | -         | 13492833  | 564292188 |
| <i>Pescatoria pulvinaris</i>    | 58042667  | 58200556  | -         | 58042579  | 564291980 |
| <i>Phymatidium falcifolium</i>  | 223371383 | 225580280 | 224968225 | -         | 224982268 |
| <i>Pityphyllum huancabambae</i> | 78095301  | 78094896  | -         | -         | 564292082 |
| <i>Pityphyllum saragurense</i>  | 93359510  | 93359528  | -         | -         | 564292232 |
| <i>Plectrophora alata</i>       | 223371384 | 225580282 | 224968228 | -         | 224982270 |
| <i>Plectrophora cultrifolia</i> | 223371516 | 223371000 | 224968762 | -         | 224982612 |
| <i>Plectrophora triquetra</i>   | 223371515 | 223370999 | 224968759 | -         | 224982610 |
| <i>Polycygnis aurita</i>        | 8699124   | 13603633  | -         | 9789404   | -         |
| <i>Polycygnis gratiosa</i>      | 745672342 | 13603635  | -         | 9789405   | 187372694 |
| <i>Polycygnis surinamensis</i>  | 8699126   | 13603637  | -         | 9789406   | -         |
| <i>Polyotidium huebneri</i>     | 223371479 | 225580316 | 224968624 | -         | 224982522 |
| <i>Polystachya albescens</i>    | 564733141 | 270484620 | -         | -         | 564733269 |
| <i>Polystachya calluniflora</i> | 298263948 | 270484657 | -         | -         | 564733293 |
| <i>Polystachya concreta</i>     | 298263995 | 270484674 | -         | 71912655  | -         |
| <i>Polystachya cultriformis</i> | 298263953 | 270484716 | -         | -         | 564291816 |
| <i>Polystachya galeata</i>      | 12330783  | 270484757 | -         | 37540165  | -         |
| <i>Polystachya longiscapa</i>   | 71912779  | 270484804 | -         | 71912654  | -         |

|                                      |           |           |           |           |           |
|--------------------------------------|-----------|-----------|-----------|-----------|-----------|
| <i>Polystachya mauritiana</i>        | 300836841 | 558760899 | -         | 558761112 | -         |
| <i>Polystachya melliodora</i>        | 298263971 | 270484813 | -         | 558761076 | -         |
| <i>Polystachya modesta</i>           | 298263972 | 270484816 | -         | 71912656  | 187372696 |
| <i>Polystachya pubescens</i>         | 297660158 | 270484879 | -         | -         | -         |
| <i>Polystachya pyramidalis</i>       | 564733134 | 564733230 | -         | -         | 564733299 |
| <i>Promenaea ovatiloba</i>           | 58042718  | 37223014  | -         | 58042621  | -         |
| <i>Promenaea stapelioides</i>        | 58042719  | 58200660  | -         | 58042622  | 161597773 |
| <i>Promenaea xanthina</i>            | 58042717  | 58200656  | -         | 58042620  | 564291936 |
| <i>Psychopsis limminghei</i>         | 223371681 | 225580318 | 224969296 | -         | 224998098 |
| <i>Psychopsis papilio</i>            | 13492753  | 13603699  | 224967697 | 13492832  | 224981918 |
| <i>Psychopsis sanderae</i>           | 223371219 | 223370733 | 224967322 | 223370501 | 224981674 |
| <i>Pterostemma antioquiense</i>      | 223371417 | 225580292 | 224968381 | 223370521 | 224982370 |
| <i>Pterostemma benzingii</i>         | 223371633 | 223371123 | 224969143 | -         | 224997998 |
| <i>Rhetinantha aciantha</i>          | 78095235  | 78094815  | -         | -         | -         |
| <i>Rhetinantha acuminata</i>         | 78095347  | 78094620  | -         | -         | 564292158 |
| <i>Rhetinantha divaricata</i>        | 78095317  | 78094594  | -         | -         | -         |
| <i>Rhetinantha friedrichsthalii</i>  | 78095084  | 78094862  | -         | -         | -         |
| <i>Rhetinantha notylioglossa</i>     | 78095053  | 78094370  | -         | -         | 564291906 |
| <i>Rhetinantha scorpoidea</i>        | 78094997  | 78094844  | -         | -         | -         |
| <i>Rhynchosele bictoniensis</i>      | 13492700  | 126789171 | 224967290 | 13492779  | 224981654 |
| <i>Rhynchosele candidula</i>         | 223371311 | 223370807 | 224967901 | -         | 224982050 |
| <i>Rhynchosele cervantesii</i>       | 223371293 | 225580158 | 224967760 | -         | 224981958 |
| <i>Rhynchosele cordata</i>           | 223371291 | 164513219 | 224967751 | -         | 224981952 |
| <i>Rhynchosele galeottiana</i>       | 223371309 | 223370804 | 224967892 | -         | 224982044 |
| <i>Rhynchosele londesboroughiana</i> | 13492701  | 15004400  | 224967529 | 13492780  | 224981816 |
| <i>Rhynchosele maculata</i>          | 223371295 | 223370791 | 224967778 | -         | 224981970 |
| <i>Rhynchosele madrensis</i>         | 223371310 | 223370805 | 224967895 | -         | 224982046 |
| <i>Rhynchosele majalis</i>           | 223371302 | 223370799 | 224967859 | -         | 224982022 |
| <i>Rhynchosele pygmaea</i>           | 223371290 | 223370789 | 224967748 | -         | 224981950 |
| <i>Rhynchosele rossii</i>            | 223371292 | 225580156 | 224967757 | -         | 224981956 |
| <i>Rhynchosele stellata</i>          | 223371289 | 223370788 | 224967745 | -         | 224981948 |
| <i>Rhynchosele uroskinneri</i>       | 223371308 | 223370803 | 224967889 | -         | 224982042 |

|                                     |           |           |           |           |           |
|-------------------------------------|-----------|-----------|-----------|-----------|-----------|
| <i>Rodriguezia batemanii</i>        | 223371512 | 223370996 | 224968750 | 223370535 | 224982604 |
| <i>Rodriguezia chasei</i>           | 223371491 | 225580330 | 224968678 | -         | 224982556 |
| <i>Rodriguezia delcastilloi</i>     | 13492714  | 15004426  | 224968573 | 13492793  | 224982488 |
| <i>Rodriguezia lanceolata</i>       | 13492713  | 15004424  | 224967334 | 13492792  | 224981682 |
| <i>Rodriguezia leeana</i>           | 223371565 | 223371048 | 224968909 | -         | 224982710 |
| <i>Rodriguezia lehmannii</i>        | 223371576 | 223371061 | 224968948 | -         | 224982734 |
| <i>Rodriguezia pulchra</i>          | 223371497 | 223370981 | 224968705 | -         | 224982574 |
| <i>Rodriguezia satipoana</i>        | 13492715  | 15004428  | 224968576 | 13492794  | 224982490 |
| <i>Rossioglossum ampliatum</i>      | 121763188 | 13603703  | 224967257 | 223370496 | 224981632 |
| <i>Rossioglossum insleayi</i>       | 223371304 | 225580200 | 224967874 | -         | 224982032 |
| <i>Rossioglossum krameri</i>        | 126789416 | 126789193 | 224967397 | -         | 224981724 |
| <i>Rossioglossum oerstedii</i>      | 223371285 | 225580140 | 224967718 | 223370509 | 224981932 |
| <i>Rossioglossum schlieperianum</i> | 126789415 | 126789194 | 224967266 | 223370497 | 224981638 |
| <i>Sauvetea chicana</i>             | 93359518  | 564291796 | -         | -         | 564292236 |
| <i>Sauvetea laevilabris</i>         | 78095273  | 78094557  | -         | -         | 564292070 |
| <i>Schlimmia stevensonii</i>        | 8699119   | 13603623  | -         | 9789399   | -         |
| <i>Schunkea vierlingii</i>          | 223371361 | 225580262 | 224968108 | -         | 224982190 |
| <i>Scuticaria hadwenii</i>          | 8699080   | 13603545  | -         | 9789360   | 564291944 |
| <i>Scuticaria salesiana</i>         | 78095324  | 78094600  | -         | 18175464  | 564292098 |
| <i>Sievekingia colombiana</i>       | 8699108   | 13603601  | -         | 9789388   | -         |
| <i>Sievekingia herrenhusana</i>     | 8699109   | 13603603  | -         | 9789389   | -         |
| <i>Solenidium lunatum</i>           | 223371380 | 225580276 | 224968210 | -         | 224982258 |
| <i>Solenidium portillae</i>         | 223371493 | 223370977 | 224968690 | 223370531 | 224982564 |
| <i>Soterosanthus shephardii</i>     | 745672344 | 13603611  | -         | 745672406 | 187372723 |
| <i>Stanhopea anfracta</i>           | 8699106   | 13603597  | -         | 9789386   | 564292226 |
| <i>Stanhopea annulata</i>           | 8699100   | 13603585  | -         | 9789380   | 187372727 |
| <i>Stanhopea cirrhata</i>           | 8699120   | 13603625  | -         | 9789400   | 564291924 |
| <i>Stanhopea ecornuta</i>           | 8699101   | 13603587  | -         | 9789381   | 564291928 |
| <i>Stanhopea jenischiana</i>        | 223371658 | 223371150 | 224969227 | -         | 224982912 |
| <i>Stanhopea pulla</i>              | 8699107   | 13603599  | -         | 9789387   | 564291926 |
| <i>Stanhopea saccata</i>            | 8699103   | 13603591  | 167890836 | 9789383   | -         |
| <i>Stanhopea tigrina</i>            | 223371245 | 13603593  | -         | 9789384   | 187372729 |



|                                  |           |           |           |           |           |
|----------------------------------|-----------|-----------|-----------|-----------|-----------|
| <i>Stenia bismarckii</i>         | 58042637  | 126789214 | -         | 58042551  | 564291988 |
| <i>Stenia calceolaris</i>        | 58042636  | 58200494  | -         | 58042550  | 564291992 |
| <i>Stenia glatzii</i>            | 58042638  | 58200498  | -         | 58042552  | -         |
| <i>Stenia pallida</i>            | 58042639  | 58200500  | -         | 58042553  | -         |
| <i>Stenotyla lankesteriana</i>   | 58042679  | 58200580  | -         | 58042591  | 564291970 |
| <i>Stenotyla lendyana</i>        | 58042680  | 58200582  | -         | 58042592  | 564291966 |
| <i>Stenotyla picta</i>           | 58042678  | 58200578  | -         | 58042590  | 564291994 |
| <i>Systemoglossum acuminatum</i> | 13492699  | 15004396  | 224967712 | 13492778  | 224981928 |
| <i>Systemoglossum bennettii</i>  | 223371235 | 223370749 | 224967460 | -         | 224981766 |
| <i>Telipogon acicularis</i>      | 84782528  | 84782594  | -         | 84657374  | 224997277 |
| <i>Telipogon ampliflorus</i>     | 84782541  | 223370891 | 224968306 | -         | 224982322 |
| <i>Telipogon ariasii</i>         | 84782543  | 84782606  | 224968309 | 84657380  | 224982324 |
| <i>Telipogon barbozae</i>        | 84782529  | 84782596  | 224968408 | 84657375  | 224997510 |
| <i>Telipogon biolleyi</i>        | 84782544  | 84782608  | 224968312 | 84657381  | 224982326 |
| <i>Telipogon bombiformis</i>     | 84782545  | 223370887 | 224968291 | 223370519 | 224982312 |
| <i>Telipogon bullpenensis</i>    | 84782531  | 84782598  | 224968411 | 84657376  | 224997512 |
| <i>Telipogon butcheri</i>        | 84782546  | 84782610  | 224968285 | 84657382  | 224982308 |
| <i>Telipogon caulescens</i>      | 84782547  | 223370938 | 224968273 | 84657383  | 224982300 |
| <i>Telipogon chiriquensis</i>    | 84782549  | 223370885 | 224968279 | -         | 224982304 |
| <i>Telipogon hystrix</i>         | 84782532  | 84782600  | 224968633 | 84657377  | 224982526 |
| <i>Telipogon klotzschianus</i>   | 84782557  | 223370939 | 224968489 | -         | 224982434 |
| <i>Telipogon maduroi</i>         | 84782558  | 223370888 | 224968294 | -         | 224982314 |
| <i>Telipogon medusae</i>         | 84782559  | 223370886 | 224968288 | -         | 224982310 |
| <i>Telipogon monteverdensis</i>  | 84782533  | 84782602  | 224968414 | 84657378  | 224997514 |
| <i>Telipogon nervosus</i>        | 84782561  | 323388403 | 224968174 | 84657385  | 224982234 |
| <i>Telipogon obovatus</i>        | 223371624 | 223371114 | 224969113 | 223370551 | 224982840 |
| <i>Telipogon olmosii</i>         | 84782562  | 223370895 | 224968321 | -         | 224982334 |
| <i>Telipogon panamensis</i>      | 84782563  | 84782618  | 224968282 | 84657386  | 224982306 |
| <i>Telipogon parvulus</i>        | 13492684  | 13603675  | 224968327 | 13492763  | 224982338 |
| <i>Telipogon personatus</i>      | 84782565  | 225580290 | 224968330 | -         | 224982340 |
| <i>Telipogon pogonostalix</i>    | 13492682  | 13603673  | 224967451 | 13492761  | 224981760 |
| <i>Telipogon pulcher</i>         | 84782566  | 84782622  | -         | 84657388  | 224982182 |

|                                    |           |           |           |           |           |
|------------------------------------|-----------|-----------|-----------|-----------|-----------|
| <i>Telipogon smaragdinus</i>       | 84782535  | 223371055 | 224968930 | -         | 224982722 |
| <i>Telipogon vargasii</i>          | 84782571  | 84782626  | 224968168 | 84657390  | 224982230 |
| <i>Telipogon venustus</i>          | 223371204 | 223370724 | 224967242 | -         | 224981620 |
| <i>Thysanoglossa jordanensis</i>   | 126789390 | 126789197 | -         | -         | -         |
| <i>Tolumnia arizajuliana</i>       | 223371338 | 223370833 | 224968036 | -         | 224982140 |
| <i>Tolumnia calochila</i>          | 13492703  | 15004404  | 224967538 | 13492782  | 224981822 |
| <i>Tolumnia compressicaulis</i>    | 223371336 | 223370831 | 224968030 | -         | 224982136 |
| <i>Tolumnia gauntlettii</i>        | 223371378 | 223370870 | 224968204 | -         | 224982254 |
| <i>Tolumnia guianensis</i>         | 223371314 | 223370811 | 224967931 | -         | 224982070 |
| <i>Tolumnia guibertiana</i>        | 223371457 | 223370951 | 224968525 | -         | 224982458 |
| <i>Tolumnia gundlachii</i>         | 223371661 | 223371153 | 224969236 | -         | 224982918 |
| <i>Tolumnia haitiensis</i>         | 223371408 | 223370904 | 224968354 | -         | 224982354 |
| <i>Tolumnia hawkesiana</i>         | 223371357 | 223370848 | 224968096 | -         | 224982180 |
| <i>Tolumnia henekenii</i>          | 13492706  | 15004410  | 224967688 | 13492785  | 224981912 |
| <i>Tolumnia lemoniana</i>          | 223371636 | 223371128 | 224969158 | -         | 224982868 |
| <i>Tolumnia prionochoila</i>       | 223371315 | 223370812 | 224967934 | -         | 224982072 |
| <i>Tolumnia pulchella</i>          | 223371348 | 223370841 | 224968072 | -         | 224982164 |
| <i>Tolumnia quadriloba</i>         | 223371501 | 223370985 | 224968717 | -         | 224982582 |
| <i>Tolumnia sasseri</i>            | 223371356 | 223370847 | 224968093 | -         | 224982178 |
| <i>Tolumnia scandens</i>           | 223371324 | 223370819 | 224967979 | -         | 224982102 |
| <i>Tolumnia sylvestris</i>         | 223371335 | 223370830 | 224968027 | -         | 224982134 |
| <i>Tolumnia triquetra</i>          | 223371351 | 223370844 | 224968078 | -         | 224982168 |
| <i>Tolumnia tuerckheimii</i>       | 13492705  | 15004408  | 224967691 | 13492784  | 224981914 |
| <i>Tolumnia urophylla</i>          | 223371313 | 223370810 | 224967928 | -         | 224982068 |
| <i>Tolumnia variegata</i>          | 13492704  | 15004406  | 224968714 | 13492783  | 224982580 |
| <i>Trevoria escobariana</i>        | 126789429 | 126789208 | -         | 745672408 | -         |
| <i>Trevoria zahlbruckneriana</i>   | 8699117   | 13603619  | -         | 9789397   | 564291852 |
| <i>Trichocentrum bicallosum</i>    | 223371229 | 223370742 | 224967406 | -         | 224981730 |
| <i>Trichocentrum cebolleta</i>     | 223371690 | 223371183 | 224969326 | 13492823  | 224998118 |
| <i>Trichocentrum cepula</i>        | 223371685 | 223371178 | 224969311 | -         | 224998108 |
| <i>Trichocentrum cosympheporum</i> | 223371494 | 223370978 | 224968696 | -         | 224997704 |
| <i>Trichocentrum cymbiglossum</i>  | 223371617 | 223371106 | 224969089 | -         | 224982824 |

|                                      |           |           |           |           |           |
|--------------------------------------|-----------|-----------|-----------|-----------|-----------|
| <i>Trichocentrum jonesianum</i>      | 13492745  | 15004487  | 224967421 | 13492824  | 224981740 |
| <i>Trichocentrum lacerum</i>         | 223371667 | 223371159 | 224969254 | 223370561 | 224998072 |
| <i>Trichocentrum lanceanum</i>       | 13492748  | 126789256 | 224967658 | 13492827  | 224981892 |
| <i>Trichocentrum lindenii</i>        | 223371566 | 225580272 | 224968912 | -         | 224982712 |
| <i>Trichocentrum longicalcaratum</i> | 223371545 | 223371028 | 224968849 | -         | 224982670 |
| <i>Trichocentrum margalefii</i>      | 223371675 | 223371167 | 224969278 | -         | 224982946 |
| <i>Trichocentrum morenoi</i>         | 223371462 | 223370956 | 224968558 | -         | 224982478 |
| <i>Trichocentrum nanum</i>           | 223371650 | 223371142 | 224969203 | -         | 224982898 |
| <i>Trichocentrum oerstedii</i>       | 223371371 | 223370865 | 224968183 | -         | 224982240 |
| <i>Trichocentrum panduratum</i>      | 223371230 | 223370743 | 224967409 | -         | 224981732 |
| <i>Trichocentrum pfavii</i>          | 13492746  | 13603691  | 224967670 | 13492825  | 224981900 |
| <i>Trichocentrum pulchrum</i>        | 169303233 | 223370975 | 224968672 | -         | 224982552 |
| <i>Trichocentrum pumilum</i>         | 223371676 | 223371168 | 224969281 | -         | 224982948 |
| <i>Trichocentrum stramineum</i>      | 223371369 | 223370863 | 224968177 | -         | 224997357 |
| <i>Trichocentrum tigrinum</i>        | 223371213 | 186972406 | 224967275 | 223370498 | 187372734 |
| <i>Trichoceros antennifer</i>        | 13492683  | 15004364  | 224967478 | 13492762  | 224981778 |
| <i>Trichoceros muralis</i>           | 223371489 | 225580328 | 224968669 | 84657391  | 224982550 |
| <i>Trichopilia brevis</i>            | 13492752  | 15004501  | 224967403 | 13492831  | 224981728 |
| <i>Trichopilia fragrans</i>          | 223371589 | 223371074 | 224968990 | -         | 224982762 |
| <i>Trichopilia laxa</i>              | 223371246 | 223370758 | 224967526 | -         | 224981814 |
| <i>Trichopilia leucoxantha</i>       | 223371642 | 223371134 | 224969179 | -         | 224982882 |
| <i>Trichopilia sanguinolenta</i>     | 13492751  | 15004499  | 224968783 | 13492830  | 187372738 |
| <i>Trichopilia suavis</i>            | 223371208 | 223370729 | 224967254 | -         | 224981630 |
| <i>Trichopilia subulata</i>          | 13492749  | 15004495  | 224967496 | 13492828  | 224981790 |
| <i>Trichopilia turialbae</i>         | 223371279 | 167890042 | 224967673 | -         | 224981902 |
| <i>Trigonidium egertonianum</i>      | 399144501 | 13603547  | -         | 9789361   | 564291916 |
| <i>Trigonidium insigne</i>           | 78095205  | 78094501  | -         | -         | 564292212 |
| <i>Trigonidium obtusum</i>           | 78095049  | 78094366  | -         | -         | -         |
| <i>Trigonidium riopalenquense</i>    | 78094953  | 78094312  | -         | -         | -         |
| <i>Trigonidium turbinatum</i>        | 78095122  | 78094438  | -         | -         | 564291914 |
| <i>Trizeuxis falcata</i>             | 223371234 | 167889834 | 224967454 | 223370504 | 224981762 |
| <i>Vanda tessellata</i>              | 71912898  | 353442674 | 576703379 | 293618067 | -         |

|                                   |           |           |           |           |           |
|-----------------------------------|-----------|-----------|-----------|-----------|-----------|
| <i>Vargasiella peruviana</i>      | 588295514 | 588295515 | -         | 588295517 | -         |
| <i>Vasqueziella boliviana</i>     | 8699129   | 13603643  | -         | 9789409   | 564291892 |
| <i>Vitekorchis excavata</i>       | 13492935  | 223370771 | 224967586 | 223370552 | 224981852 |
| <i>Vitekorchis lucasiana</i>      | 223371594 | 223371081 | 224969014 | -         | 224982776 |
| <i>Warczewiczella discolor</i>    | 58042676  | 58200574  | -         | 58042588  | 564292028 |
| <i>Warczewiczella guianensis</i>  | 58042673  | 58200568  | -         | 58042585  | -         |
| <i>Warczewiczella lipscombiae</i> | 58042675  | 58200566  | -         | 58042584  | -         |
| <i>Warczewiczella marginata</i>   | 58042675  | 58200572  | -         | 58042587  | 187372742 |
| <i>Warmingia eugenii</i>          | 223371217 | 225580078 | 224967310 | -         | 224981666 |
| <i>Warmingia zamorana</i>         | 223371390 | 225580284 | 224968255 | -         | 224982288 |
| <i>Warreopsis colorata</i>        | 58042701  | 58200624  | -         | -         | -         |
| <i>Warreopsis pardina</i>         | 58042702  | 58200626  | -         | -         | -         |
| <i>Zelenkoa onusta</i>            | 13492726  | 126789168 | 224967388 | 13492805  | 224981718 |
| <i>Zygopetalum maculatum</i>      | 58042715  | 18027086  | -         | 58042618  | 653816614 |
| <i>Zygostates alleniana</i>       | 126789391 | 126789198 | 224968138 | 84657393  | 224982210 |
| <i>Zygostates apiculata</i>       | 223371640 | 223371132 | 224969170 | 223370554 | 224982876 |
| <i>Zygostates grandiflora</i>     | 13492679  | 15004356  | 224967430 | 13492758  | 224981746 |
| <i>Zygostates lunata</i>          | 84782578  | 223370856 | 224968141 | -         | 224982212 |
| <i>Zygostates obliqua</i>         | 84782509  | 223370859 | 224968159 | -         | 224982224 |

**Table S2**

| <b>Scientific Name</b>                 | <b>ITS</b> | <b>mat K</b> |
|----------------------------------------|------------|--------------|
| <i>Acianthera aphthosa</i>             | JQ306355   | -            |
| <i>Acianthera asaroides</i>            | JQ306431   | -            |
| <i>Acianthera barbacenensis</i>        | JQ306423   | -            |
| <i>Acianthera binotii</i>              | JQ306361   | -            |
| <i>Acianthera binotii</i>              | JQ306430   | -            |
| <i>Acianthera bragae</i>               | JQ306362   | -            |
| <b><i>Acianthera butcheri</i></b>      | KY084270   | KY218749     |
| <i>Acianthera capanemae</i>            | JQ306367   | -            |
| <i>Acianthera capillaris</i>           | JQ306424   | -            |
| <i>Acianthera capillaris</i>           | JQ306425   | -            |
| <i>Acianthera cogniauxiana</i>         | KR816545   | KR816554     |
| <i>Acianthera compressiflora</i>       | JQ306436   | -            |
| <i>Acianthera crinita</i>              | JQ306434   | -            |
| <i>Acianthera crinita</i>              | JQ306435   | -            |
| <i>Acianthera cryptantha</i>           | JQ306433   | -            |
| <i>Acianthera decipiens</i>            | KR816546   | KR816555     |
| <i>Acianthera enianthera</i>           | JQ306394   | -            |
| <i>Acianthera fabriobarrosii</i>       | JQ306426   | -            |
| <i>Acianthera fenestrata</i>           | AF262857   | AF265468     |
| <i>Acianthera foetens</i>              | JQ306432   | -            |
| <i>Acianthera fornograndensis</i>      | JQ306448   | -            |
| <i>Acianthera fornograndensis</i>      | JQ306353   | -            |
| <i>Acianthera freyi</i>                | JQ306494   | -            |
| <b><i>Acianthera geminicaulina</i></b> | KY084275   | KY218756     |
| <i>Acianthera glanduligera</i>         | JQ306369   | -            |
| <i>Acianthera gracilisepala</i>        | JQ306404   | -            |
| <b><i>Acianthera hamata</i></b>        | KY084277   | -            |
| <i>Acianthera hamosa</i>               | JQ306447   | -            |
| <i>Acianthera hamosa</i>               | JQ306374   | -            |

|                                       |          |          |
|---------------------------------------|----------|----------|
| <i>Acianthera hatschbachii</i>        | JQ306406 | -        |
| <i>Acianthera heringeri</i>           | JQ306363 | -        |
| <i>Acianthera jordanensis</i>         | JQ306378 | -        |
| <i>Acianthera karlii</i>              | JQ306489 | -        |
| <i>Acianthera klotzschiana</i>        | JQ306445 | -        |
| <i>Acianthera lanceana</i>            | KR816548 | KR816557 |
| <i>Acianthera limae</i>               | JQ306450 | -        |
| <i>Acianthera lojiae</i>              | KR816549 | KR816558 |
| <i>Acianthera micrantha</i>           | JQ306373 | -        |
| <i>Acianthera minima</i>              | JQ306382 | -        |
| <i>Acianthera montana</i>             | JQ306437 | -        |
| <i>Acianthera nemorosa</i>            | JQ306466 | -        |
| <i>Acianthera ochreata</i>            | AF262858 | AY008458 |
| <i>Acianthera ochreata</i>            | JQ306354 | -        |
| <i>Acianthera ochreata</i>            | JQ306427 | -        |
| <b><i>Acianthera odontotepala</i></b> | KY081773 | -        |
| <b><i>Acianthera oscitans</i></b>     | KY988806 | KY988625 |
| <i>Acianthera panduripetala</i>       | JQ306371 | -        |
| <i>Acianthera papillosa</i>           | JQ306501 | -        |
| <i>Acianthera pavimentata</i>         | JQ306443 | -        |
| <i>Acianthera pavimentata</i>         | JQ306444 | -        |
| <i>Acianthera perdusenii</i>          | JQ306454 | -        |
| <i>Acianthera platystachys</i>        | JQ306428 | -        |
| <i>Acianthera prolifera</i>           | AF275688 | AF275697 |
| <i>Acianthera pubescens</i>           | JQ306365 | -        |
| <i>Acianthera pubescens</i>           | JQ306366 | -        |
| <i>Acianthera ramosa</i>              | JQ306438 | -        |
| <i>Acianthera recurva</i>             | JQ306375 | -        |
| <i>Acianthera rodriguesii</i>         | JQ306446 | -        |
| <b><i>Acianthera rubroviridis</i></b> | KY081774 | -        |
| <i>Acianthera saundersiana</i>        | EF079371 | EF079330 |
| <i>Acianthera saundersiana</i>        | JQ306452 | -        |

|                                      |          |          |
|--------------------------------------|----------|----------|
| <i>Acianthera saurocephala</i>       | AF262851 | AF265469 |
| <i>Acianthera saurocephala</i>       | JQ306356 | -        |
| <i>Acianthera serpentula</i>         | JQ306370 | -        |
| <i>Acianthera serpentula</i>         | JQ306411 | -        |
| <i>Acianthera sicaria</i>            | KR816550 | KR816559 |
| <i>Acianthera sonderiana</i>         | JQ306377 | -        |
| <i>Acianthera sonderiana</i>         | JQ306496 | -        |
| <i>Acianthera spilantha</i>          | JQ306359 | -        |
| <i>Acianthera spilantha</i>          | JQ306360 | -        |
| <i>Acianthera strupifolia</i>        | JQ306440 | -        |
| <i>Acianthera testifolia</i>         | KR816551 | KR816560 |
| <i>Acianthera testifolia</i>         | KR816552 | -        |
| <i>Acianthera translucida</i>        | JQ306368 | -        |
| <i>Acianthera tricarinata</i>        | JQ306495 | -        |
| <b><i>Acianthera wilsonii</i></b>    | KY081776 | -        |
| <i>Anathallis adenochila</i>         | KC425725 | -        |
| <i>Anathallis adenochila</i>         | JQ306490 | -        |
| <i>Anathallis aristulata</i>         | JQ306338 | -        |
| <i>Anathallis bolsanelloi</i>        | JQ306342 | -        |
| <i>Anathallis burzlaffiana</i>       | KC425727 | KC425857 |
| <i>Anathallis citrina</i>            | JQ306498 | -        |
| <b><i>Anathallis depauperata</i></b> | KC425735 | KY988626 |
| <b><i>Anathallis funerea</i></b>     | KY988807 | KY988627 |
| <i>Anathallis grayumii</i>           | KC425730 | -        |
| <i>Anathallis grayumii</i>           | KC425731 | KP012494 |
| <i>Anathallis heterophylla</i>       | JQ306339 | -        |
| <i>Anathallis kautskyi</i>           | JQ306340 | -        |
| <i>Anathallis lewisiae</i>           | KC425733 | KC425858 |
| <i>Anathallis nanifolia</i>          | KC425736 | -        |
| <i>Anathallis nectarifera</i>        | JQ306458 | -        |
| <i>Anathallis obovata</i>            | JQ306497 | -        |
| <i>Anathallis obovata</i>            | JQ306337 | -        |



|                                     |          |          |
|-------------------------------------|----------|----------|
| <i>Anathallis ourobranquensis</i>   | JQ306459 | -        |
| <i>Anathallis pabstii</i>           | KC425737 | KC425859 |
| <i>Anathallis pachyphyta</i>        | KC425734 | -        |
| <i>Anathallis peroupavae</i>        | KF747837 | -        |
| <i>Anathallis petropolitana</i>     | JQ306491 | -        |
| <i>Anathallis piratiningana</i>     | JQ306344 | -        |
| <i>Anathallis pubipetala</i>        | JQ306460 | -        |
| <i>Anathallis rabei</i>             | KC425738 | KC425860 |
| <i>Anathallis radialis</i>          | JQ306345 | -        |
| <i>Anathallis rudolfii</i>          | JQ306461 | -        |
| <i>Anathallis welteri</i>           | JQ306341 | -        |
| <i>Andinia longiserpens</i>         | KC425744 | KP012521 |
| <i>Andinia pensilis</i>             | AF262826 | AF265455 |
| <i>Andinia platysepala</i>          | JQ995331 | KC425864 |
| <i>Andinia schizopogon</i>          | KC425740 | KP012518 |
| <i>Arpophyllum giganteum</i>        | AF266742 | AF265485 |
| <b><i>Barbosella australis</i></b>  | KY988808 | KY988628 |
| <i>Barbosella cucullata</i>         | AF262815 | AF265483 |
| <b><i>Brachionidium kirbyi</i></b>  | KY988809 | KY988629 |
| <i>Dilomilis montana</i>            | AF260147 | AY368404 |
| <i>Dilomilis montana</i>            | AF262915 | AF263765 |
| <i>Diodonopsis erinacea</i>         | AF262788 | EU214336 |
| <b><i>Draconanthes aberrans</i></b> | KY988810 | KY988630 |
| <i>Dracula amaliae</i>              | EF372351 | -        |
| <i>Dracula andreettae</i>           | EF372357 | -        |
| <i>Dracula andreettae</i>           | AF262765 | -        |
| <i>Dracula astuta</i>               | EF372365 | -        |
| <i>Dracula astuta</i>               | AF262762 | -        |
| <i>Dracula bella</i>                | AF262760 | -        |
| <i>Dracula chestertonii</i>         | AF262758 | -        |
| <i>Dracula chimaera</i>             | EF372358 | -        |
| <i>Dracula chimaera</i>             | AF262766 | AF265444 |

|                                        |          |          |
|----------------------------------------|----------|----------|
| <i>Dracula cochliops</i>               | AF262767 | -        |
| <i>Dracula cordobae</i>                | EF372355 | -        |
| <i>Dracula diabola</i>                 | EF372363 | -        |
| <i>Dracula dodsonii</i>                | AF262759 | -        |
| <i>Dracula erythrochaete</i>           | EF372364 | -        |
| <i>Dracula erythrochaete</i>           | AF262763 | EU214337 |
| <i>Dracula gorgona</i>                 | EF372377 | -        |
| <i>Dracula hirtzii</i>                 | EF372382 | -        |
| <b><i>Dracula inexperata</i></b>       | KY988811 | KY988631 |
| <i>Dracula iricolor</i>                | EF372392 | -        |
| <i>Dracula lemurella</i>               | EF372361 | -        |
| <i>Dracula polyphemus</i>              | EF372368 | -        |
| <i>Dracula radiosa</i>                 | EF372373 | -        |
| <i>Dracula rezekiana</i>               | EF372376 | -        |
| <i>Dracula roezlii</i>                 | EF372381 | -        |
| <i>Dracula sodiroi</i>                 | AF262764 | -        |
| <i>Dracula vampira</i>                 | EF372356 | -        |
| <i>Dracula vampira</i>                 | AF262761 | -        |
| <i>Dracula wallisii</i>                | EF372375 | -        |
| <b><i>Dresslerella elvallensis</i></b> | KY988812 | KY988632 |
| <i>Dresslerella elvallensis</i>        | AF262901 | -        |
| <i>Dresslerella hirsutissima</i>       | AF262902 | -        |
| <b><i>Dresslerella hispida</i></b>     | KY988813 | KP012427 |
| <b><i>Dresslerella hispida</i></b>     | KY988814 | KY988633 |
| <b><i>Dresslerella hispida</i></b>     | KY988815 | KP012428 |
| <b><i>Dresslerella hispida</i></b>     | KY988816 | KY988634 |
| <b><i>Dresslerella pertusa</i></b>     | KY988817 | -        |
| <i>Dresslerella pertusa</i>            | AF262903 | -        |
| <b><i>Dresslerella pilosissima</i></b> | KY988818 | KP012446 |
| <b><i>Dresslerella sp.</i></b>         | KY988819 | KY988635 |
| <i>Dryadella albicans</i>              | KC425742 | KC425863 |
| <i>Dryadella aviceps</i>               | JQ306381 | -        |

|                                          |          |          |
|------------------------------------------|----------|----------|
| <i>Dryadella edwallii</i>                | AF262824 | AF265454 |
| <b><i>Dryadella fuschi</i></b>           | KY988820 | KY988636 |
| <i>Dryadella guatemalensis</i>           | KC425743 | -        |
| <i>Dryadella hirtzii</i>                 | EF079367 | EF079327 |
| <i>Dryadella kautskyi</i>                | JQ306380 | -        |
| <i>Dryadella simula</i>                  | AF262825 | AF265453 |
| <i>Dryadella susanae</i>                 | KQ306486 | -        |
| <i>Echinosepala aspasicensis</i>         | AF262905 | AF302645 |
| <i>Echinosepala pan</i>                  | KP012471 | KP012429 |
| <b><i>Echinosepala sempergemmata</i></b> | KP012473 | KY988637 |
| <i>Fronitaria caulescens</i>             | AF262914 | AF265471 |
| <b><i>Kraenzlinella anfracta</i></b>     | KY084291 | KY218777 |
| <b><i>Kraenzlinella erinacea</i></b>     | KY084293 | KY218778 |
| <b><i>Kraenzlinella sp</i></b>           | KY084289 | KY218773 |
| <i>Lankesteriana barbulata</i>           | KF747834 | -        |
| <i>Lankesteriana barbulata</i>           | KC425726 | -        |
| <i>Lankesteriana barbulata</i>           | JQ306457 | -        |
| <b><i>Lankesteriana casualis</i></b>     | KY988821 | KY988638 |
| <i>Lankesteriana cuspidata</i>           | KF747835 | -        |
| <i>Lankesteriana duplooyi</i>            | KF747836 | -        |
| <i>Lankesteriana fractiflexa</i>         | KC425729 | -        |
| <b><i>Lepanthes ankistra</i></b>         | KY988822 | KY988639 |
| <b><i>Lepanthes atrata</i></b>           | KY988823 | KY988640 |
| <b><i>Lepanthes blephariglossa</i></b>   | KY988824 | KY988641 |
| <b><i>Lepanthes blephariglossa</i></b>   | KY988825 | KY988642 |
| <b><i>Lepanthes blepharistes</i></b>     | KY988826 | KY988643 |
| <b><i>Lepanthes blepharistes</i></b>     | KY988827 | KY988644 |
| <b><i>Lepanthes blepharistes</i></b>     | KY988828 | KY988645 |
| <b><i>Lepanthes blepharistes</i></b>     | KY988829 | KY988646 |
| <b><i>Lepanthes bradei</i></b>           | KY988830 | KY988647 |
| <b><i>Lepanthes brunnescens</i></b>      | KY988831 | KY988648 |
| <b><i>Lepanthes calliope</i></b>         | KY988832 | KY988649 |

|                                 |          |          |
|---------------------------------|----------|----------|
| <i>Lepanthes calodyction</i>    | KY988833 | KY988650 |
| <i>Lepanthes candida</i>        | KY988834 | KY988651 |
| <i>Lepanthes caprimulgus</i>    | KY988835 | KY988652 |
| <i>Lepanthes cascajalensis</i>  | KY988836 | KY988653 |
| <i>Lepanthes cloesii</i>        | KY988837 | KY988654 |
| <i>Lepanthes confusa</i>        | KY988838 | KY988655 |
| <i>Lepanthes cribii</i>         | KY988839 | KY988656 |
| <i>Lepanthes cuspidata</i>      | KY988840 | KY988657 |
| <i>Lepanthes decipiens</i>      | KY988841 | KY988658 |
| <i>Lepanthes demissa</i>        | KY988842 | KY988659 |
| <i>Lepanthes dikoensis</i>      | KY988843 | KY988660 |
| <i>Lepanthes disticha</i>       | KY988845 | KY988661 |
| <i>Lepanthes dolabriformis</i>  | KY988846 | KY988662 |
| <i>Lepanthes dolabriformis</i>  | KY988847 | KY988663 |
| <i>Lepanthes droseroides</i>    | KY988848 | KY988664 |
| <i>Lepanthes dubbeldamii</i>    | KY988849 | KY988665 |
| <i>Lepanthes elata</i>          | KY988850 | KY988666 |
| <i>Lepanthes elata</i>          | KY988851 | KY988667 |
| <i>Lepanthes elata</i>          | KY988852 | KY988668 |
| <i>Lepanthes elegans</i>        | KY988853 | KY988669 |
| <i>Lepanthes eximia</i>         | KY988854 | KY988670 |
| <i>Lepanthes ferrelliae</i>     | KY988855 | KY988671 |
| <i>Lepanthes gargantua</i>      | KY988856 | KY988672 |
| <i>Lepanthes glicensteinii</i>  | KY988857 | KY988673 |
| <i>Lepanthes gracillima</i>     | KY988858 | KY988674 |
| <i>Lepanthes gustavoromeroi</i> | KY988859 | KY988675 |
| <i>Lepanthes hermansii</i>      | KY988860 | KY988676 |
| <i>Lepanthes horichii</i>       | KY988861 | KY988677 |
| <i>Lepanthes kleinii</i>        | KY988862 | KY988678 |
| <i>Lepanthes latisepala</i>     | KY988863 | KY988679 |
| <i>Lepanthes latisepala</i>     | KY988864 | KY988680 |
| <i>Lepanthes lindleyana</i>     | KY988865 | KY988681 |

|                                 |          |          |
|---------------------------------|----------|----------|
| <i>Lepanthes lindleyana</i>     | KY988866 | KY988682 |
| <i>Lepanthes machogaffensis</i> | KY988867 | KY988683 |
| <i>Lepanthes maduroi</i>        | KY988868 | KY988684 |
| <i>Lepanthes martinae</i>       | KY988869 | KY988685 |
| <i>Lepanthes matamorosii</i>    | KY988870 | KY988686 |
| <i>Lepanthes mentosa</i>        | KY988871 | KY988687 |
| <i>Lepanthes monteverdensis</i> | KY988872 | KY988688 |
| <i>Lepanthes montisnarae</i>    | KY988873 | KY988689 |
| <i>Lepanthes myiophora</i>      | KY988874 | KY988690 |
| <i>Lepanthes mystax</i>         | KY988875 | KY988691 |
| <i>Lepanthes nycteris</i>       | KY988876 | KY988692 |
| <i>Lepanthes olmosii</i>        | KY988877 | KY988693 |
| <i>Lepanthes pulcherrima</i>    | KY988878 | KY988694 |
| <i>Lepanthes queveriensis</i>   | KY988879 | KY988695 |
| <i>Lepanthes rafaeliana</i>     | KY988880 | KY988696 |
| <i>Lepanthes regularis</i>      | KY988881 | KY988697 |
| <i>Lepanthes ribes</i>          | KY988882 | KY988698 |
| <i>Lepanthes saltatrix</i>      | KY988883 | KY988699 |
| <i>Lepanthes sandiorum</i>      | KY988884 | KY988700 |
| <i>Lepanthes siboei</i>         | KY988885 | KY988701 |
| <i>Lepanthes sijmii</i>         | KY988886 | KY988702 |
| <i>Lepanthes spadariae</i>      | KY988887 | KY988703 |
| <i>Lepanthes stenorrhyncha</i>  | KY988888 | KY988704 |
| <i>Lepanthes terborchii</i>     | KY988889 | KY988705 |
| <i>Lepanthes tristis</i>        | KY988890 | KY988706 |
| <i>Lepanthes turialvae</i>      | KY988891 | KY988707 |
| <i>Lepanthes variabilis</i>     | KY988892 | KY988708 |
| <i>Lepanthes velosa</i>         | KY988893 | KY988709 |
| <i>Lepanthes wendlandii</i>     | KY988894 | KY988710 |
| <i>Lepanthes whittenii</i>      | KY988895 | KY988711 |
| <i>Lepanthes williamsii</i>     | KY988896 | KY988712 |
| <i>Lepanthopsis astrophora</i>  | AF262893 | AF265487 |

|                                        |          |          |
|----------------------------------------|----------|----------|
| <b><i>Lepanthopsis floripecten</i></b> | KY988897 | KY988713 |
| <b><i>Lepanthopsis floripecten</i></b> | KY988898 | -        |
| <i>Masdevallia amaluzae</i>            | AF262799 | -        |
| <i>Masdevallia ampullacea</i>          | AF262772 | -        |
| <i>Masdevallia aphanes</i>             | AF262802 | -        |
| <i>Masdevallia bicornis</i>            | AF262792 | -        |
| <i>Masdevallia caesia</i>              | AF262786 | -        |
| <i>Masdevallia caloptera</i>           | AF262773 | -        |
| <b><i>Masdevallia calura</i></b>       | KY988899 | KY988715 |
| <b><i>Masdevallia calura</i></b>       | KY988900 | KY988716 |
| <i>Masdevallia caudivolvula</i>        | AF262770 | -        |
| <i>Masdevallia chaparensis</i>         | AF262797 | -        |
| <i>Masdevallia citrinella</i>          | AF262774 | -        |
| <i>Masdevallia coccinea</i>            | AF262789 | -        |
| <i>Masdevallia collina</i>             | AF262784 | -        |
| <i>Masdevallia coriacea</i>            | AF262781 | -        |
| <i>Masdevallia decumana</i>            | AF262795 | -        |
| <b><i>Masdevallia eburnea</i></b>      | KY988901 | KY988717 |
| <i>Masdevallia exquisita</i>           | KF479479 | -        |
| <b><i>Masdevallia flaveola</i></b>     | KY988902 | KY988718 |
| <i>Masdevallia floribunda</i>          | AF262776 | AY368416 |
| <b><i>Masdevallia fulvescens</i></b>   | KY988903 | KY988719 |
| <i>Masdevallia heteroptera</i>         | AF262800 | -        |
| <i>Masdevallia hieroglyphica</i>       | AF262798 | -        |
| <i>Masdevallia infracta</i>            | AF262785 | -        |
| <i>Masdevallia infracta</i>            | JQ306379 | -        |
| <i>Masdevallia kyphonantha</i>         | AF262780 | -        |
| <b><i>Masdevallia lata</i></b>         | KY988905 | KY988721 |
| <i>Masdevallia limax</i>               | AF262796 | -        |
| <i>Masdevallia mentosa</i>             | AF262777 | -        |
| <b><i>Masdevallia molossus</i></b>     | KY988906 | KY988722 |
| <i>Masdevallia nidifica</i>            | AF262787 | -        |

|                                         |          |          |
|-----------------------------------------|----------|----------|
| <i>Masdevallia nidifica</i>             | -        | JQ771566 |
| <i>Masdevallia ophioglossa</i>          | AF262790 | -        |
| <i>Masdevallia oreas</i>                | AF262779 | -        |
| <i>Masdevallia picturata</i>            | AF262775 | -        |
| <i>Masdevallia pinocchio</i>            | AF262778 | AF265445 |
| <i>Masdevallia racemosa</i>             | AF262771 | -        |
| <i>Masdevallia reichenbachiana</i>      | AF262783 | -        |
| <i>Masdevallia rubeola</i>              | AF262791 | -        |
| <i>Masdevallia saltatrix</i>            | AF262793 | -        |
| <i>Masdevallia scandens</i>             | KF479476 | -        |
| <b><i>Masdevallia smallmanniana</i></b> | KY988907 | KY988723 |
| <b><i>Masdevallia sp.</i></b>           | KY988908 | KY988724 |
| <b><i>Masdevallia striatella</i></b>    | KY988909 | KY988725 |
| <i>Masdevallia titan</i>                | AF262803 | -        |
| <i>Masdevallia uniflora</i>             | AF262769 | AF265446 |
| <i>Masdevallia venezuelana</i>          | AF262782 | -        |
| <i>Masdevallia ximenesae</i>            | AF262794 | -        |
| <i>Masdevallia yungasensis</i>          | KF478478 | -        |
| <b><i>Masdevallia zahlbruckneri</i></b> | KY988910 | KY988726 |
| <b><i>Masdevallia zahlbruckneri</i></b> | KY988911 | KY988727 |
| <i>Muscarella aristata</i>              | KC425842 | -        |
| <i>Muscarella cabellensis</i>           | KF747794 | KP012396 |
| <b><i>Muscarella catoxys</i></b>        | KY988912 | KY988728 |
| <i>Muscarella claviculata</i>           | KC425777 | -        |
| <i>Muscarella fimbriata</i>             | KC425785 | -        |
| <b><i>Muscarella furcatipetala</i></b>  | KY988913 | KY988729 |
| <i>Muscarella hastata</i>               | KF747773 | KR816553 |
| <i>Muscarella helenae</i>               | KC425847 | -        |
| <i>Muscarella herpestes</i>             | KC425801 | -        |
| <i>Muscarella llamachoi</i>             | KC425848 | -        |
| <i>Muscarella longilabris</i>           | KC425849 | -        |
| <i>Muscarella macroblepharis</i>        | KC425805 | -        |



|                                        |          |          |
|----------------------------------------|----------|----------|
| <i>Muscarella marginata</i>            | KC425806 | -        |
| <i>Muscarella megalops</i>             | KC425807 | -        |
| <i>Muscarella mucronata</i>            | KC425850 | -        |
| <i>Muscarella obliquipetala</i>        | KC425851 | -        |
| <i>Muscarella quinqueseta</i>          | KC425817 | -        |
| <b><i>Muscarella schudelii</i></b>     | KY988914 | KY988730 |
| <i>Muscarella segregafolia</i>         | KC425822 | -        |
| <b><i>Muscarella semperflorens</i></b> | KY988915 | KY988731 |
| <i>Muscarella sp.</i>                  | KF747774 | KP012419 |
| <b><i>Muscarella sp.</i></b>           | KY988916 | KY988732 |
| <i>Muscarella strumosa</i>             | KC425831 | -        |
| <b><i>Myoxanthus colothrix</i></b>     | KY988917 | KP012438 |
| <b><i>Myoxanthus exasperatus</i></b>   | KY988918 | KP012439 |
| <b><i>Myoxanthus hirsuticaulis</i></b> | KY988919 | KP012442 |
| <i>Myoxanthus lonchophyllus</i>        | AF262884 | -        |
| <b><i>Myoxanthus octomeriae</i></b>    | KY988920 | KP012444 |
| <i>Myoxanthus ovatipetalus</i>         | JQ306351 | -        |
| <i>Myoxanthus punctatus</i>            | AF262885 | AF265479 |
| <i>Myoxanthus ruschii</i>              | JQ306352 | -        |
| <b><i>Myoxanthus scandens</i></b>      | KY988921 | KP012443 |
| <i>Myoxanthus seidelii</i>             | JQ306350 | -        |
| <i>Myoxanthus serripetalus</i>         | AF262883 | -        |
| <b><i>Myoxanthus sp.</i></b>           | KY988922 | KP012440 |
| <b><i>Myoxanthus sp.</i></b>           | KY988923 | KP012441 |
| <i>Neocogniauxia hexaptera</i>         | AF260148 | AF263766 |
| <i>Neocogniauxia hexaptera</i>         | AY429385 | -        |
| <i>Neocogniauxia monophylla</i>        | AY008474 | -        |
| <b><i>Octomeria costaricensis</i></b>  | KY988924 | KY988733 |
| <i>Octomeria gracilis</i>              | AF262911 | AF265484 |
| <b><i>Octomeria valerioi</i></b>       | KY988925 | KY988734 |
| <i>Pabstiella alligatorifera</i>       | JQ306467 | -        |
| <i>Pabstiella arcuata</i>              | JQ306477 | -        |

|                                   |          |          |
|-----------------------------------|----------|----------|
| <i>Pabstiella aryter</i>          | JF934816 | JF934876 |
| <i>Pabstiella aurantiaca</i>      | JQ306357 | -        |
| <i>Pabstiella biriricensis</i>    | JQ306463 | -        |
| <i>Pabstiella birricensis</i>     | JQ306409 | -        |
| <i>Pabstiella bowmannii</i>       | JQ306483 | -        |
| <i>Pabstiella carinifera</i>      | JQ306397 | -        |
| <i>Pabstiella castellensis</i>    | JQ306484 | -        |
| <i>Pabstiella concepcionensis</i> | JQ306470 | -        |
| <i>Pabstiella concepcionensis</i> | JQ306499 | -        |
| <i>Pabstiella ephemera</i>        | JQ995332 | -        |
| <i>Pabstiella fasciata</i>        | JQ306473 | -        |
| <i>Pabstiella hians</i>           | JQ306478 | -        |
| <i>Pabstiella hypnicola</i>       | JQ995333 | KY988735 |
| <i>Pabstiella lingua</i>          | JQ306387 | -        |
| <i>Pabstiella lueriana</i>        | JQ306474 | -        |
| <i>Pabstiella lueriana</i>        | JQ306475 | -        |
| <i>Pabstiella mentosa</i>         | AF262864 | -        |
| <i>Pabstiella mirabilis</i>       | AF262830 | -        |
| <i>Pabstiella pelifeloidis</i>    | JQ306479 | -        |
| <i>Pabstiella pelifeloidis</i>    | JQ306476 | -        |
| <i>Pabstiella pterophora</i>      | JQ306396 | -        |
| <i>Pabstiella pterophora</i>      | JQ306396 | -        |
| <i>Pabstiella punctatifolia</i>   | JQ306346 | -        |
| <i>Pabstiella punctatifolia</i>   | JQ306395 | -        |
| <i>Pabstiella punctatifolia</i>   | JQ306346 | -        |
| <i>Pabstiella rhombilabia</i>     | JQ306488 | -        |
| <i>Pabstiella rubrolineata</i>    | JQ306393 | -        |
| <i>Pabstiella seriata</i>         | JQ306465 | -        |
| <i>Pabstiella seriata</i>         | JQ306464 | -        |
| <i>Pabstiella seriata</i>         | JQ306465 | -        |
| <i>Pabstiella sordida</i>         | JQ306399 | -        |
| <i>Pabstiella sp.</i>             | JQ306462 | -        |

|                                       |          |          |
|---------------------------------------|----------|----------|
| <i>Pabstiella teschiana</i>           | JQ306480 | -        |
| <i>Pabstiella transparens</i>         | KF747838 | -        |
| <i>Pabstiella tricolor</i>            | JQ306429 | -        |
| <i>Pabstiella trifida</i>             | JQ306390 | -        |
| <i>Pabstiella tripterantha</i>        | AF275694 | -        |
| <i>Pabstiella tripterantha</i>        | JF934815 | -        |
| <i>Pabstiella uniflora</i>            | JQ306469 | -        |
| <i>Pabstiella villosisepala</i>       | JQ306471 | -        |
| <i>Pabstiella villosisepala</i>       | JQ306472 | -        |
| <i>Pabstiella wacketii</i>            | JQ995334 | KC425856 |
| <i>Pabstiella wawraeana</i>           | JQ306407 | -        |
| <i>Phloeophila nummularia</i>         | KF747839 | KP012380 |
| <i>Phloeophila nummularia</i>         | KC425841 | -        |
| <i>Phloeophila pelecanceps</i>        | AF262810 | AF265450 |
| <i>Phloeophila peperomioides</i>      | AF275690 | AF291103 |
| <i>Phloeophila peperomioides</i>      | KC425745 | -        |
| <i>Phloeophila pleurothallopsis</i>   | KC425746 | KP012495 |
| <i>Phloeophila pleurothallopsis</i>   | KC425747 | KP012496 |
| <i>Phloeophila pleurothallopsis</i>   | AF262811 | AF265451 |
| <i>Platystele acicularis</i>          | KF747778 | -        |
| <b><i>Platystele aff. reflexa</i></b> | KC425756 | -        |
| <i>Platystele beatricis</i>           | KC425749 | KP012499 |
| <i>Platystele consobrina</i>          | KC425751 | -        |
| <i>Platystele gyroglossa</i>          | KC425752 | -        |
| <b><i>Platystele hirtzii</i></b>      | KF747780 | -        |
| <i>Platystele jungermannioides</i>    | KY988926 | KY988736 |
| <i>Platystele lancilabris</i>         | KP012493 | KP012386 |
| <i>Platystele microtatantha</i>       | KF747781 | -        |
| <i>Platystele minimiflora</i>         | KF747782 | KP012387 |
| <i>Platystele misasiana</i>           | KF747783 | KP012388 |
| <i>Platystele propinqua</i>           | KF747785 | KP012390 |
| <b><i>Platystele resimula</i></b>     | KY988927 | KY988737 |

|                                           |          |          |
|-------------------------------------------|----------|----------|
| <i>Platystele schmidtchenii</i>           | KF747786 | -        |
| <i>Platystele sp. nov.</i>                | KY988928 | -        |
| <i>Platystele stenostachya</i>            | KF747787 | -        |
| <i>Platystele stenostachya</i>            | KC425759 | KP012501 |
| <i>Platystele tica</i>                    | KP012458 | KP012391 |
| <b><i>Pleurothallis adventurae</i></b>    | KY988929 | KY988738 |
| <i>Pleurothallis allenii</i>              | AF262844 | -        |
| <b><i>Pleurothallis anceps</i></b>        | KY988930 | KY988739 |
| <b><i>Pleurothallis anthrax</i></b>       | KY988931 | KY988740 |
| <b><i>Pleurothallis arietina</i></b>      | KY988932 | KY988741 |
| <i>Pleurothallis aurantiaca</i>           | JQ306357 | -        |
| <b><i>Pleurothallis aurita</i></b>        | KY988933 | KY988742 |
| <i>Pleurothallis bivalvis</i>             | JQ306400 | -        |
| <b><i>Pleurothallis bogarinii</i></b>     | KY988934 | KY988743 |
| <i>Pleurothallis cardiantha</i>           | AF262832 | -        |
| <i>Pleurothallis cardiothallis</i>        | AF262917 | -        |
| <b><i>Pleurothallis cardiothallis</i></b> | KY988935 | -        |
| <b><i>Pleurothallis cardiothallis</i></b> | -        | KY988744 |
| <i>Pleurothallis cypelligera</i>          | KY988937 | KY988745 |
| <b><i>Pleurothallis dentipetala</i></b>   | KY988938 | KY988746 |
| <i>Pleurothallis discoidea</i>            | JQ306401 | -        |
| <b><i>Pleurothallis divaricans</i></b>    | KY988939 | KY988747 |
| <i>Pleurothallis dorotheae</i>            | KY988940 | KY988748 |
| <i>Pleurothallis eumecocaulon</i>         | KY988941 | KY988749 |
| <i>Pleurothallis fantastica</i>           | KC425761 | -        |
| <b><i>Pleurothallis gratiosa</i></b>      | KY988942 | KY988750 |
| <b><i>Pleurothallis helleri</i></b>       | KY988943 | KY988751 |
| <i>Pleurothallis hemirhoda</i>            | AF262874 | -        |
| <b><i>Pleurothallis inornata</i></b>      | KY988944 | KY988752 |
| <i>Pleurothallis loranthophylla</i>       | AF262837 | -        |
| <b><i>Pleurothallis matudana</i></b>      | KY988945 | -        |
| <i>Pleurothallis miranda</i>              | AF262875 | -        |

|                                                |          |          |
|------------------------------------------------|----------|----------|
| <i>Pleurothallis niveoglobula</i>              | AF262839 | -        |
| <b><i>Pleurothallis pruinosa</i></b>           | KY988946 | KY988753 |
| <i>Pleurothallis quadrifida</i>                | JF934824 | -        |
| <i>Pleurothallis quadrifida</i>                | JF934825 | -        |
| <i>Pleurothallis racemiflora</i>               | AY008477 | AY396076 |
| <b><i>Pleurothallis renniana</i></b>           | KY988947 | KY988754 |
| <i>Pleurothallis restrepioides</i>             | JF934795 | JF934856 |
| <b><i>Pleurothallis rowleei</i></b>            | KY988948 | KY988755 |
| <b><i>Pleurothallis rowleei</i></b>            | KY988949 | KY988756 |
| <b><i>Pleurothallis ruscaria</i></b>           | KY988950 | KY988757 |
| <i>Pleurothallis ruscifolia</i>                | JF934814 | JF934873 |
| <b><i>Pleurothallis scaphipetala</i></b>       | KY988951 | KY988758 |
| <b><i>Pleurothallis scoparum</i></b>           | KY988952 | KY988759 |
| <b><i>Pleurothallis silvaepacis</i></b>        | JQ995336 | KY988760 |
| <b><i>Pleurothallis silverstonei</i></b>       | KY988953 | KY988761 |
| <b><i>Pleurothallis sp.</i></b>                | KY988954 | KY988762 |
| <i>Pleurothallis teaguei</i>                   | AF275695 | -        |
| <b><i>Pleurothallis tonduzii</i></b>           | KY988955 | -        |
| <b><i>Pleurothallis tonduzii</i></b>           | KY988956 | KY988763 |
| <i>Pleurothallis truncata</i>                  | AF262834 | -        |
| <i>Pleurothallis viduata</i>                   | AF262838 | -        |
| <b><i>Pleurothallis volcanica</i></b>          | KY988957 | KY988764 |
| <b><i>Pleurothallopsis microptera</i></b>      | KY988958 | KY988765 |
| <i>Pleurothallopsis nemorosa</i>               | AF291099 | AF291104 |
| <b><i>Pleurothallopsis reichenbachiana</i></b> | KY988959 | KY988766 |
| <b><i>Pleurothallopsis striata</i></b>         | KY988960 | KY988767 |
| <b><i>Pleurothallopsis tubulosa</i></b>        | KY988961 | KY988768 |
| <i>Porroglossum amethystinum</i>               | AF262804 | AF265448 |
| <b><i>Porroglossum apoloae</i></b>             | KY988962 | -        |
| <b><i>Porroglossum oversteegenianum</i></b>    | KY988963 | -        |
| <i>Porroglossum rodrigoii</i>                  | AF262805 | -        |
| <b><i>Porroglossum sijmii</i></b>              | KY988964 | -        |

|                                       |          |          |
|---------------------------------------|----------|----------|
| <i>Porroglossum uxorium</i>           | AF262806 | -        |
| <i>Restrepia antennifera</i>          | AF262906 | -        |
| <i>Restrepia aristulifera</i>         | AF262907 | AF265481 |
| <b><i>Restrepia muscifera</i></b>     | KY988965 | KP012449 |
| <b><i>Restrepiella lueri</i></b>      | KY988966 | KY988769 |
| <i>Restrepiella ophiocephala</i>      | AF262909 | AF265482 |
| <i>Scaphosepalum anchoriferum</i>     | KP012459 | KP012392 |
| <i>Scaphosepalum grande</i>           | AF262819 | -        |
| <b><i>Scaphosepalum jostii</i></b>    | KY988967 | KY988770 |
| <i>Scaphosepalum microdactylum</i>    | KP012460 | KP012393 |
| <i>Scaphosepalum ovulare</i>          | KC425764 | KP012503 |
| <i>Scaphosepalum swertiifolium</i>    | KC425765 | KP012504 |
| <i>Scaphosepalum verrucosum</i>       | KC425767 | KP012505 |
| <i>Specklinia absurda</i>             | KC425827 | KP012506 |
| <i>Specklinia acoana</i>              | KF747800 | -        |
| <i>Specklinia acrisepala</i>          | KC425768 | -        |
| <i>Specklinia alajuelensis</i>        | KC425791 | -        |
| <i>Specklinia alajuelensis</i>        | KC425792 | -        |
| <i>Specklinia alajuelensis</i>        | KP012454 | KP012412 |
| <b><i>Specklinia alajuelensis</i></b> | KY988968 | KY988771 |
| <i>Specklinia alta</i>                | KF747791 | KP012394 |
| <b><i>Specklinia berlinensis</i></b>  | KY988969 | -        |
| <i>Specklinia blancoi</i>             | KC425772 | -        |
| <b><i>Specklinia brighamii</i></b>    | KC425773 | KY988772 |
| <i>Specklinia brighamii</i>           | KC425774 | -        |
| <i>Specklinia cactantha</i>           | KF747795 | KP012397 |
| <i>Specklinia calyptrosteles</i>      | KC425775 | KP012507 |
| <i>Specklinia chontalensis</i>        | KF747799 | KP012399 |
| <i>Specklinia colombiana</i>          | KC425809 | -        |
| <i>Specklinia corniculata</i>         | KF747801 | KP012400 |
| <i>Specklinia costaricensis</i>       | KC425783 | AF265459 |
| <i>Specklinia cucumeris</i>           | KF747805 | KP012403 |

|                                        |          |          |
|----------------------------------------|----------|----------|
| <i>Specklinia digitalis</i>            | KF747806 | KP012404 |
| <i>Specklinia displosa</i>             | KF747808 | KP012405 |
| <i>Specklinia dodii</i>                | KF747809 | KP012406 |
| <b><i>Specklinia dunstervillei</i></b> | KY988970 | KY988773 |
| <i>Specklinia endotrachys</i>          | KF747810 | KP012407 |
| <i>Specklinia fuegi</i>                | KC425786 | KP012408 |
| <b><i>Specklinia fulgens</i></b>       | KC425800 | KY988774 |
| <i>Specklinia gersonii</i>             | KP012457 | KP012424 |
| <i>Specklinia glandulosa</i>           | KP012452 | KP012410 |
| <b><i>Specklinia glandulosa</i></b>    | KY988971 | KY988775 |
| <i>Specklinia gracillima</i>           | KC425793 | -        |
| <i>Specklinia grisebachiana</i>        | KC425846 | -        |
| <i>Specklinia grobyi</i>               | KF747813 | -        |
| <i>Specklinia grobyi</i>               | KF747829 | KP012413 |
| <i>Specklinia grobyi</i>               | KF747814 | -        |
| <i>Specklinia guanacastensis</i>       | KP012464 | KP012414 |
| <i>Specklinia lanceola</i>             | KC425803 | KY988776 |
| <b><i>Specklinia lanceola</i></b>      | KY988972 | KY988777 |
| <i>Specklinia lentiginosa</i>          | AF275692 | -        |
| <i>Specklinia lichenicola</i>          | KC425845 | -        |
| <i>Specklinia lugduno</i>              | KC425824 | -        |
| <i>Specklinia luisdiegoi</i>           | KC425835 | -        |
| <i>Specklinia microphylla</i>          | KC425808 | -        |
| <i>Specklinia montezumae</i>           | KC425811 | KP012509 |
| <i>Specklinia morganii</i>             | KF747818 | KP012415 |
| <i>Specklinia pfavii</i>               | KC425814 | KP012510 |
| <i>Specklinia picta</i>                | KC425815 | -        |
| <i>Specklinia pisinna</i>              | KC425797 | -        |
| <i>Specklinia psychion</i>             | KC425816 | -        |
| <i>Specklinia recula</i>               | KF747822 | KP012416 |
| <i>Specklinia remotiflora</i>          | KC425819 | KP012511 |
| <i>Specklinia schaferi</i>             | KC425852 | -        |



|                                        |          |          |
|----------------------------------------|----------|----------|
| <i>Specklinia scolopax</i>             | KC425821 | KP012512 |
| <i>Specklinia simmleriana</i>          | KC425823 | -        |
| <b><i>Specklinia sp.</i></b>           | KY988973 | KY988778 |
| <i>Specklinia subpicta</i>             | JQ306389 | -        |
| <i>Specklinia succulenta</i>           | JQ306383 | -        |
| <i>Specklinia tribuloides</i>          | KC425834 | -        |
| <i>Specklinia trichyphus</i>           | KC425854 | -        |
| <i>Specklinia trilobata</i>            | KF747843 | -        |
| <i>Specklinia truncicola</i>           | JQ306391 | -        |
| <i>Specklinia turrialbae</i>           | KF747831 | KP012425 |
| <i>Specklinia vierlingii</i>           | KC425780 | -        |
| <i>Specklinia vittariifolia</i>        | KP012453 | -        |
| <b><i>Specklinia vittariifolia</i></b> | KY988974 | KY988779 |
| <i>Specklinia wrightii</i>             | KC425855 | -        |
| <i>Stelis adrianae</i>                 | JQ995340 | -        |
| <i>Stelis alajuelensis</i>             | JQ995341 | JF934870 |
| <b><i>Stelis allenii</i></b>           | JQ995342 | KY988780 |
| <i>Stelis alta</i>                     | JF934804 | -        |
| <b><i>Stelis angustipetala</i></b>     | KY988975 | -        |
| <i>Stelis argentata</i>                | AF262878 | -        |
| <i>Stelis argentata</i>                | JF934764 | -        |
| <i>Stelis argentata</i>                | JQ306421 | -        |
| <i>Stelis atrovioleacea</i>            | AF262879 | -        |
| <b><i>Stelis atwoodi</i></b>           | JQ995343 | KY988781 |
| <i>Stelis brunnea</i>                  | JF934798 | -        |
| <b><i>Stelis canae</i></b>             | JQ995362 | KY988782 |
| <i>Stelis carnosilabia</i>             | JF934808 | -        |
| <i>Stelis carnosula</i>                | JQ306412 | -        |
| <i>Stelis carpintera</i>               | JF934796 | JF934858 |
| <i>Stelis carpintera</i>               | JF934796 | -        |
| <i>Stelis cobanensis</i>               | JQ995344 | -        |
| <b><i>Stelis conochila</i></b>         | KY988976 | KY988783 |

|                                 |          |          |
|---------------------------------|----------|----------|
| <i>Stelis convallaria</i>       | JF934791 | JF934851 |
| <b><i>Stelis cylindrata</i></b> | JQ995345 | KY988784 |
| <i>Stelis deregularis</i>       | KC425839 | -        |
| <i>Stelis despectans</i>        | JF934761 | JF934831 |
| <i>Stelis deutroadrianae</i>    | JF934799 | JF934860 |
| <b><i>Stelis dimidia</i></b>    | KY988977 | KY988785 |
| <i>Stelis dressleri</i>         | JF934759 | JF934829 |
| <i>Stelis emarginata</i>        | JF934781 | -        |
| <i>Stelis endresii</i>          | JQ306413 | -        |
| <b><i>Stelis ferrelliae</i></b> | JQ995347 | KY988786 |
| <i>Stelis fraterna</i>          | JQ306414 | -        |
| <b><i>Stelis galeata</i></b>    | JQ995348 | KY988787 |
| <i>Stelis gelida</i>            | JF934779 | JF934843 |
| <i>Stelis gelida</i>            | JF934778 | -        |
| <i>Stelis gemma</i>             | AF262880 | -        |
| <i>Stelis glomerosa</i>         | JQ995349 | -        |
| <i>Stelis glossula</i>          | JF934766 | -        |
| <i>Stelis glossula</i>          | JF934767 | -        |
| <i>Stelis guatemalensis</i>     | JF934765 | -        |
| <i>Stelis harlingii</i>         | EF079364 | -        |
| <i>Stelis harlingii</i>         | AF262846 | AF265465 |
| <i>Stelis hydra</i>             | JQ995330 | -        |
| <i>Stelis immersa</i>           | JF934790 | -        |
| <i>Stelis immersa</i>           | JF934789 | JF934850 |
| <i>Stelis janetiae</i>          | JF934802 | JF934863 |
| <i>Stelis lamprophylla</i>      | JF934774 | JF934838 |
| <i>Stelis lamprophylla</i>      | JF934776 | -        |
| <i>Stelis lanata</i>            | AF262881 | -        |
| <b><i>Stelis lankesteri</i></b> | JQ995353 | KY988788 |
| <i>Stelis lennartii</i>         | JF934777 | JF934841 |
| <i>Stelis lennartii</i>         | JQ995324 | -        |
| <i>Stelis lueriana</i>          | JF934810 | JF934870 |

|                                   |          |          |
|-----------------------------------|----------|----------|
| <i>Stelis lueriana</i>            | JF934810 | -        |
| <i>Stelis lutea</i>               | AF262827 | -        |
| <i>Stelis megachlamys</i>         | JF934806 | JF934867 |
| <i>Stelis megantha</i>            | JQ306419 | -        |
| <i>Stelis microchila</i>          | JF934758 | -        |
| <i>Stelis microchila</i>          | JF934757 | JF934827 |
| <i>Stelis montserratii</i>        | JQ995325 | -        |
| <i>Stelis montserratii</i>        | JQ306493 | -        |
| <i>Stelis morae</i>               | JF934768 | -        |
| <b><i>Stelis multirostris</i></b> | JQ995354 | KY988789 |
| <i>Stelis mystax</i>              | JQ995355 | -        |
| <i>Stelis mystax</i>              | JF934794 | JF934855 |
| <b><i>Stelis nexipous</i></b>     | KY988978 | -        |
| <i>Stelis pachyglossa</i>         | JQ995359 | KC425865 |
| <i>Stelis papillifera</i>         | JF934812 | -        |
| <i>Stelis parvula</i>             | JQ306420 | -        |
| <i>Stelis peliochyla</i>          | JQ306417 | -        |
| <b><i>Stelis pidax</i></b>        | KY988979 | -        |
| <i>Stelis pileata</i>             | JQ995328 | KC425861 |
| <i>Stelis pilosa</i>              | JF934787 | JF934848 |
| <i>Stelis platystylis</i>         | JQ995360 | -        |
| <i>Stelis pulchella</i>           | JF934772 | JF934836 |
| <i>Stelis punctulata</i>          | JF934783 | JF934845 |
| <i>Stelis rodrigo</i>             | AF262829 | -        |
| <i>Stelis sclerophylla</i>        | JQ995327 | -        |
| <i>Stelis segoviensis</i>         | AF262866 | -        |
| <b><i>Stelis segoviensis</i></b>  | JQ995367 | KY988790 |
| <i>Stelis segoviensis</i>         | JQ995365 | -        |
| <i>Stelis segoviensis</i>         | AF262866 | AF276313 |
| <i>Stelis sp.</i>                 | JQ995326 | -        |
| <b><i>Stelis sp.</i></b>          | KY988980 | -        |
| <b><i>Stelis sp.</i></b>          | KY988981 | -        |

|                                          |          |          |
|------------------------------------------|----------|----------|
| <i>Stelis spnov</i>                      | JF934770 | -        |
| <i>Stelis spnov</i>                      | JF934763 | -        |
| <i>Stelis tubata</i>                     | AF262845 | -        |
| <i>Stelis velaticaulis</i>               | AF262847 | -        |
| <i>Stelis velaticaulis</i>               | JF934773 | JF934837 |
| <i>Stelis viridiflava</i>                | JQ995330 | KC425862 |
| <b><i>Stelis wercklei</i></b>            | KY988982 | -        |
| <i>Stelis wettsteiniana</i>              | JQ306422 | -        |
| <b><i>Trichosalpinx arbuscula</i></b>    | KY988983 | KY988791 |
| <b><i>Trichosalpinx berlineri</i></b>    | KY988984 | KY988792 |
| <b><i>Trichosalpinx cedralensis</i></b>  | KY988985 | KY988793 |
| <i>Trichosalpinx dependens</i>           | JQ306456 | -        |
| <i>Trichosalpinx egleri</i>              | JQ306347 | -        |
| <b><i>Trichosalpinx fruticosa</i></b>    | KY988986 | KY988794 |
| <b><i>Trichosalpinx minutipetala</i></b> | KY988987 | KY988795 |
| <b><i>Trichosalpinx nymphalis</i></b>    | KY988988 | KY988796 |
| <b><i>Trichosalpinx orbicularis</i></b>  | KY988989 | KY988797 |
| <b><i>Trichosalpinx pusilla</i></b>      | KY988990 | KY988798 |
| <b><i>Trichosalpinx reflexa</i></b>      | KY988991 | KY988799 |
| <b><i>Trichosalpinx reflexa</i></b>      | KY988992 | KY988800 |
| <b><i>Trichosalpinx sijmii</i></b>       | KY988993 | KY988801 |
| <i>Trisetella gemmata</i>                | AF262809 | -        |
| <i>Trisetella scobina</i>                | AF262808 | AF265449 |
| <i>Trisetella triglochis</i>             | EF079368 | EF065592 |
| <i>Trisetella triglochis</i>             | AF262807 | -        |
| <i>Zootrophion atropurpureum</i>         | JQ306415 | -        |
| <i>Zootrophion dayanum</i>               | AF262898 | AF265452 |
| <b><i>Zootrophion endresianum</i></b>    | KY988994 | KY988802 |
| <b><i>Zootrophion gracilentum</i></b>    | KY988995 | -        |
| <b><i>Zootrophion hirtzii</i></b>        | KY988996 | -        |
| <b><i>Zootrophion hypodiscus</i></b>     | KY988997 | -        |
| <b><i>Zootrophion machaqway</i></b>      | KY988998 | KY988803 |

|                                  |          |          |
|----------------------------------|----------|----------|
| <i>Zootrophion oblongifolium</i> | KY988999 | -        |
| <i>Zootrophion serpentinum</i>   | AF262899 | -        |
| <i>Zootrophion vulturiceps</i>   | KY989000 | KY988804 |
| <i>Zootrophion ximena</i>        | KY989001 | KY988805 |

**Table S3**

| <b>Alt.<sup>1</sup> model</b> | <b>Null model</b> | <b>LnL Alt</b> | <b>LnL null</b> | <b>AIC Alt.</b> | <b>AIC Null</b> | <b>AICwt<sup>2</sup> Alt.</b> | <b>AICwt Null</b> | <b>AICwt ratio Alt.</b> | <b>AICwt ratio Null</b> |
|-------------------------------|-------------------|----------------|-----------------|-----------------|-----------------|-------------------------------|-------------------|-------------------------|-------------------------|
| DEC+J                         | DEC               | -2479          | -2495           | 4965            | 4994            | 1                             | 4,70E-07          | 2139964                 | 4,70E-07                |
| DIVALIKE+J                    | DIVALIKE          | -2584          | -2597           | 5174            | 5199            | 1                             | 4,80E-06          | 208937                  | 4,80E-06                |
| BAYAREALIKE+J                 | BAYAREALIKE       | -2547          | -2611           | 5101            | 5227            | 1                             | 4,50E-28          | 2,21E+27                | 4,50E-28                |

<sup>1</sup>Alternative model

<sup>2</sup>AIC weight

**Table S4**

| <b>Alt.<sup>1</sup> model</b> | <b>Null model</b> | <b>LnL Alt</b> | <b>LnL null</b> | <b>AIC Alt.</b> | <b>AIC Null</b> | <b>AICwt<sup>2</sup> Alt.</b> | <b>AICwt Null</b> | <b>AICwt ratio Alt.</b> | <b>AICwt ratio Null</b> |
|-------------------------------|-------------------|----------------|-----------------|-----------------|-----------------|-------------------------------|-------------------|-------------------------|-------------------------|
| DEC+J                         | DEC               | -1375          | -1398           | 2756            | 2801            | 1                             | 2,00E-10          | 5,10E+09                | 2,00E-10                |
| DIVALIKE+J                    | DIVALIKE          | -1421          | -1432           | 2848            | 2868            | 1                             | 4,20E-05          | 23705                   | 4,20E-05                |
| BAYAREALIKE+J                 | BAYAREALIKE       | -1418          | -1502           | 2843            | 3008            | 1                             | 1,20E-36          | 8,48E+35                | 1,20E-36                |

<sup>1</sup>Alternative model<sup>2</sup>AIC weight



**Table S5**

|                         |           | <b>Denominator models</b> |           |           |          |          |          |          |          |          |           |            |
|-------------------------|-----------|---------------------------|-----------|-----------|----------|----------|----------|----------|----------|----------|-----------|------------|
| <b>Shifts</b>           |           | <b>0</b>                  | <b>1</b>  | <b>2</b>  | <b>3</b> | <b>4</b> | <b>5</b> | <b>6</b> | <b>7</b> | <b>8</b> | <b>9</b>  | <b>10</b>  |
| <b>Numerator models</b> | <b>0</b>  | 1,000000                  | 0,400000  | 0,101053  | 0,019140 | 0,009213 | 0,006609 | 0,010610 | 0,024198 | 0,061947 | 0,357914  | 0,858993   |
|                         | <b>1</b>  | 2,500000                  | 1,000000  | 0,252632  | 0,047850 | 0,023033 | 0,016522 | 0,026524 | 0,060495 | 0,154867 | 0,894785  | 2,147484   |
|                         | <b>2</b>  | 9,895833                  | 3,958333  | 1,000000  | 0,189408 | 0,091172 | 0,065398 | 0,104990 | 0,239458 | 0,613014 | 3,541857  | 8,500456   |
|                         | <b>3</b>  | 52,246094                 | 20,898438 | 5,279605  | 1,000000 | 0,481350 | 0,345277 | 0,554307 | 1,264246 | 3,236470 | 18,699605 | 44,879053  |
|                         | <b>4</b>  | 108,540853                | 43,416341 | 10,968339 | 2,077492 | 1,000000 | 0,717311 | 1,151568 | 2,626462 | 6,723742 | 38,848284 | 93,235883  |
|                         | <b>5</b>  | 151,316325                | 60,526530 | 15,290913 | 2,896223 | 1,394096 | 1,000000 | 1,605396 | 3,661538 | 9,373538 | 54,158222 | 129,979733 |
|                         | <b>6</b>  | 94,254812                 | 37,701925 | 9,524697  | 1,804055 | 0,868381 | 0,622899 | 1,000000 | 2,280769 | 5,838769 | 33,735111 | 80,964267  |
|                         | <b>7</b>  | 41,325887                 | 16,530355 | 4,176090  | 0,790985 | 0,380740 | 0,273109 | 0,438449 | 1,000000 | 2,560000 | 14,791111 | 35,498667  |
|                         | <b>8</b>  | 16,142925                 | 6,457170  | 1,631285  | 0,308979 | 0,148727 | 0,106683 | 0,171269 | 0,390625 | 1,000000 | 5,777778  | 13,866667  |
|                         | <b>9</b>  | 2,793968                  | 1,117587  | 0,282338  | 0,053477 | 0,025741 | 0,018464 | 0,029643 | 0,067608 | 0,173077 | 1,000000  | 2,400000   |
|                         | <b>10</b> | 1,164153                  | 0,465661  | 0,117641  | 0,022282 | 0,010725 | 0,007694 | 0,012351 | 0,028170 | 0,072115 | 0,416667  | 1,000000   |

Table S6

|                  |   | Denominator models |          |            |            |           |            |            |           |            |           |
|------------------|---|--------------------|----------|------------|------------|-----------|------------|------------|-----------|------------|-----------|
| Shifts           |   | 0                  | 1        | 2          | 3          | 4         | 5          | 6          | 7         | 8          | 9         |
| Numerator models | 0 | 1,000000           | 0,06     | 0,00281    | 0,000643   | 0,0006016 | 0,00089856 | 0,00143495 | 0,0035156 | 0,00390625 | 0,0087891 |
|                  | 1 | 15,111             | 1,000000 | 0,04255319 | 0,0097254  | 0,0090909 | 0,01357827 | 0,02168367 | 0,053125  | 0,05902778 | 0,1328125 |
|                  | 2 | 355,111            | 23,5     | 1,000000   | 0,22854691 | 0,2136364 | 0,31908946 | 0,50956633 | 1,2484375 | 1,3871     | 3,1210938 |
|                  | 3 | 1553,77            | 102,82   | 4,375      | 1,000000   | 0,9347594 | 1,3961     | 2,229591   | 5,4625    | 6,069444   | 13,65625  |
|                  | 4 | 1662,22            | 110      | 4,6808     | 1,069      | 1,000000  | 1,4936     | 2,3852     | 5,84375   | 6,493055   | 14,609375 |
|                  | 5 | 1112,8             | 73,64    | 3,1339     | 0,71624714 | 0,6695187 | 1,000000   | 1,59693    | 3,9125    | 4,34722    | 9,78125   |
|                  | 6 | 696,88             | 46,11    | 1,962      | 0,44851259 | 0,4192513 | 0,62619808 | 1,000000   | 2,45      | 2,722222   | 6,125     |
|                  | 7 | 284,44             | 18,82    | 0,80100125 | 0,18306636 | 0,171123  | 0,25559105 | 0,40816327 | 1,000000  | 1,11111    | 2,5       |
|                  | 8 | 256                | 16,94    | 0,72090113 | 0,16475973 | 0,1540107 | 0,23003195 | 0,36734694 | 0,9       | 1,000000   | 2,25      |
|                  | 9 | 113,77             | 7,52     | 0,3204005  | 0,07322654 | 0,0684492 | 0,10223642 | 0,16326531 | 0,4       | 0,44444444 | 1,000000  |

**Table S7**

| <b>Models</b>  | <b><i>Andean Cyrtochilum</i></b> | <b><i>Andean Oncidium</i></b> | <b><i>Andean Maxillariinae</i></b> | <b><i>Andean Zygotetaliinae</i></b> | <b><i>Lowland Catasetinae</i></b> |
|----------------|----------------------------------|-------------------------------|------------------------------------|-------------------------------------|-----------------------------------|
| M <sub>1</sub> | 209,1662181                      | 385,0432344                   | 398,9577432                        | 144,3371826                         | 167,4514812                       |
| M <sub>2</sub> | 209,972848                       | 383,3817387                   | 399,3069314                        | 145,1437381                         | <b>172,1239314</b>                |
| M <sub>3</sub> | 209,6789014                      | 383,8963526                   | 399,6904126                        | 144,4122827                         | 169,6060185                       |
| M <sub>4</sub> | <b>212,3485961</b>               | <b>385,5664845</b>            | <b>401,477973</b>                  | <b>147,6038937</b>                  | 172,0219435                       |

Table S8

| <b>Models</b>  | <b><i>Dracula + Porroglossum + Masdevallia</i></b> | <b><i>Lepanthes + Draconanthes</i></b> | <b><i>Stelis + Pabstiella + Pleurothallis</i></b> | <b><i>Specklinia (no div. rate shifts)</i></b> |
|----------------|----------------------------------------------------|----------------------------------------|---------------------------------------------------|------------------------------------------------|
| M <sub>1</sub> | 299,0857696                                        | 284,272637                             | 626,9890686                                       | 412,6994817                                    |
| M <sub>2</sub> | 299,7982804                                        | 285,6285245                            | <b>643,3945671</b>                                | 406,8332935                                    |
| M <sub>3</sub> | 299,7605406                                        | 285,576369                             | 627,2068275                                       | <b>414,8406212</b>                             |
| M <sub>4</sub> | <b>301,6334063</b>                                 | <b>287,2096523</b>                     | 629,3203181                                       | 408,5097191                                    |

**Table S9**

| <b>Cymbidieae dataset</b> |                   |                   | <b>Pleurothallidinae dataset</b> |                    |                   |
|---------------------------|-------------------|-------------------|----------------------------------|--------------------|-------------------|
| <b>Models</b>             | <b>LnL</b>        | <b>AIC</b>        | <b>Models</b>                    | <b>LnL</b>         | <b>AIC</b>        |
| M <sub>a</sub>            | -2747,42617       | 5508,85235        | M <sub>a</sub>                   | -1933,82584        | 3881,65169        |
| <b>M<sub>b</sub></b>      | <b>-2747,4254</b> | <b>5506,85085</b> | <b>M<sub>b</sub></b>             | <b>-1933,82572</b> | <b>3879,65144</b> |
| M <sub>c</sub>            | -2793,1832        | 5596,36635        | M <sub>c</sub>                   | -1935,2922         | 3880,5844         |

**Table S10**

**A. *Cyrtochilum***

| <b>Models</b>         | <b>NP</b> | <b>logL</b>   | <b>AICc</b>   | <b><math>\omega</math></b> | <b><math>\lambda</math></b> | <b><math>\alpha</math></b> | <b><math>\mu</math></b> | <b><math>\beta</math></b> |
|-----------------------|-----------|---------------|---------------|----------------------------|-----------------------------|----------------------------|-------------------------|---------------------------|
| Yule model            | 1         | -84,58        | 171,25        | 0,172                      | 0,6569                      | -                          | -                       | -                         |
| constant BD model     | 2         | -82,84        | 169,97        | 0,326                      | 1,1483                      | -                          | 0,6987                  | -                         |
| <b>BAltiVar EXPO</b>  | <b>2</b>  | <b>-82,83</b> | <b>169,95</b> | <b>0,33</b>                | <b>0,0067</b>               | <b>0,0015</b>              | -                       | -                         |
| BAltiVarDcst EXPO     | 3         | -82,69        | 171,98        | 0,119                      | 0,1396                      | 0,0007                     | 0,3189                  | -                         |
| BcstDAItiVar EXPO     | 3         | -84,6         | 175,8         | 0,018                      | 0,6557                      | -                          | 0,0629                  | -0,4259                   |
| BAltiVarDAItiVar EXPO | 4         | -82,72        | 174,46        | 0,035                      | 0,1697                      | 0,0005                     | 0,1441                  | 0,0004                    |

**B. Andean Maxillariinae**

| <b>Models</b>         | <b>NP</b> | <b>logL</b>    | <b>AICc</b>   | <b><math>\omega</math></b> | <b><math>\lambda</math></b> | <b><math>\alpha</math></b> | <b><math>\mu</math></b> | <b><math>\beta</math></b> |
|-----------------------|-----------|----------------|---------------|----------------------------|-----------------------------|----------------------------|-------------------------|---------------------------|
| Yule model            | 1         | -158,32        | 318,68        | 0,296                      | 0,7701                      | -                          | -                       | -                         |
| constant BD model     | 2         | -157,51        | 319,17        | 0,231                      | 1,0105                      | -                          | 0,3388                  | -                         |
| <b>BAltiVar EXPO</b>  | <b>2</b>  | <b>-157,25</b> | <b>318,64</b> | <b>0,302</b>               | <b>0,0926</b>               | <b>0,0008</b>              | -                       | -                         |
| BAltiVarDcst EXPO     | 3         | -157,22        | 320,74        | 0,106                      | 0,2384                      | 0,0006                     | 0,0954                  | -                         |
| BcstDAItiVar EXPO     | 3         | -158,39        | 323,07        | 0,033                      | 0,7686                      | -                          | 0,0988                  | -0,5289                   |
| BAltiVarDAItiVar EXPO | 4         | -157,3         | 323,11        | 0,032                      | 0,2159                      | 0,0004                     | 0,1648                  | -0,023                    |

**C. Andean Oncidiinae**

| <b>Models</b>         | <b>NP</b> | <b>logL</b>    | <b>AICc</b>   | <b><math>\omega</math></b> | <b><math>\lambda</math></b> | <b><math>\alpha</math></b> | <b><math>\mu</math></b> | <b><math>\beta</math></b> |
|-----------------------|-----------|----------------|---------------|----------------------------|-----------------------------|----------------------------|-------------------------|---------------------------|
| Yule model            | 1         | -168,88        | 339,81        | 0,267                      | 0,6532                      | -                          | -                       | -                         |
| constant BD model     | 2         | -168,08        | 340,3         | 0,209                      | 0,8447                      | -                          | 0,2855                  | -                         |
| <b>BAltiVar EXPO</b>  | <b>2</b>  | <b>-167,58</b> | <b>339,31</b> | <b>0,343</b>               | <b>0,0371</b>               | <b>0,0008</b>              | -                       | -                         |
| BAltiVarDcst EXPO     | 3         | -167,59        | 341,47        | 0,116                      | 0,0775                      | 0,0007                     | 0,046                   | -                         |
| BcstDAItiVar EXPO     | 3         | -168,94        | 344,17        | 0,03                       | 0,652                       | -                          | 0,0615                  | -0,4222                   |
| BAltiVarDAItiVar EXPO | 4         | -167,69        | 343,87        | 0,035                      | 0,1452                      | 0,0005                     | 0,2514                  | -0,0004                   |

**D. Andean Zygotetralinae**

| <b>Models</b>     | <b>NP</b> | <b>logL</b>   | <b>AICc</b>   | <b><math>\omega</math></b> | <b><math>\lambda</math></b> | <b><math>\alpha</math></b> | <b><math>\mu</math></b> | <b><math>\beta</math></b> |
|-------------------|-----------|---------------|---------------|----------------------------|-----------------------------|----------------------------|-------------------------|---------------------------|
| <b>Yule model</b> | <b>1</b>  | <b>-61,81</b> | <b>125,74</b> | <b>0,484</b>               | <b>0,9405</b>               | -                          | -                       | -                         |
| constant BD model | 2         | -61,52        | 127,38        | 0,213                      | 1,2123                      | -                          | 0,3832                  | -                         |
| BAltiVar EXPO     | 2         | -61,71        | 127,76        | 0,176                      | 3,1054                      | 0,0003                     | -                       | -                         |

|                       |   |        |        |       |        |        |        |         |
|-----------------------|---|--------|--------|-------|--------|--------|--------|---------|
| BAltiVarDcst EXPO     | 3 | -61,55 | 129,81 | 0,063 | 1,976  | 0,0001 | 0,3017 | -       |
| BcstDAItiVar EXPO     | 3 | -61,85 | 130,41 | 0,047 | 0,9382 | -      | 0,123  | -0,6859 |
| BAltiVarDAItiVar EXPO | 4 | -61,59 | 132,39 | 0,017 | 0,8809 | 0,0003 | 0,696  | -1,0391 |

Abbreviations: NP, number of free parameters; logL, log- likelihood;  $\lambda$ , speciation rate;  $\alpha$ , rate of variation of the speciation according to the palaeo-environmental variable;  $\mu$ , extinction rate;  $\beta$ , rate of variation of the extinction according to the palaeo-environmental variable.

Table S11

A) *Dracula + Porroglossum + Masdevallia*

| Models                   | NP       | logL          | AICc          | $\omega$    | $\lambda$     | $\alpha$ | $\mu$         | $\beta$ |
|--------------------------|----------|---------------|---------------|-------------|---------------|----------|---------------|---------|
| Yule model               | 1        | -158,84       | 319,72        | 0           | 1,1735        | -        | -             | -       |
| <b>constant BD model</b> | <b>2</b> | <b>-146,4</b> | <b>296,94</b> | <b>0,24</b> | <b>3,7551</b> | -        | <b>3,1011</b> | -       |
| BAltiVar EXPO            | 2        | -149,16       | 302,45        | 0,015       | 0,0008        | 0,0023   | -             | -       |
| BAltiVarDCST EXPO        | 3        | -148,3        | 302,89        | 0,012       | 0,0032        | 0,0026   | 0,2119        | -       |
| BestAltiVar EXPO         | 3        | -146,98       | 300,24        | 0,046       | 3,5314        | -        | 2,3458        | 0,0001  |
| BAltiVarDAAltiVar EXPO   | 4        | -147,42       | 303,32        | 0,009       | 0,0089        | 0,0022   | 0,0608        | 0,0007  |

B) *Lepanthes + Draconanthes*

| Models                   | NP       | logL           | AICc         | $\omega$     | $\lambda$     | $\alpha$ | $\mu$         | $\beta$ |
|--------------------------|----------|----------------|--------------|--------------|---------------|----------|---------------|---------|
| Yule model               | 1        | -167,72        | 337,5        | 0            | 1,0588        | -        | -             | -       |
| <b>constant BD model</b> | <b>2</b> | <b>-139,57</b> | <b>283,3</b> | <b>0,397</b> | <b>5,8238</b> | -        | <b>5,4409</b> | -       |
| BAltiVar EXPO            | 2        | -147,8         | 299,76       | 0            | 0,0005        | 0,0029   | -             | -       |
| BAltiVarDCST EXPO        | 3        | -146,25        | 298,82       | 0            | 0,0001        | 0,0035   | 0,1602        | -       |
| BestAltiVar EXPO         | 3        | -141,81        | 289,94       | 0,014        | 5,3559        | -        | 4,4095        | 0,0001  |
| BAltiVarDAAltiVar EXPO   | 4        | -145           | 298,53       | 0            | 0,0011        | 0,0031   | 0,0462        | 0,0004  |

C) *Stelis + Pabstiella + Pleurothallis*

| Models                   | NP       | logL          | AICc          | $\omega$     | $\lambda$    | $\alpha$ | $\mu$         | $\beta$ |
|--------------------------|----------|---------------|---------------|--------------|--------------|----------|---------------|---------|
| Yule model               | 1        | -348,94       | 699,9         | 0            | 1,1983       | -        | -             | -       |
| <b>constant BD model</b> | <b>2</b> | <b>-302,3</b> | <b>608,67</b> | <b>0,377</b> | <b>5,348</b> | -        | <b>4,8291</b> | -       |
| BAltiVar EXPO            | 2        | -316,74       | 637,54        | 0            | 0,0002       | 0,0027   | -             | -       |
| BAltiVarDCST EXPO        | 3        | -314,45       | 635,04        | 0            | 0,0004       | 0,0031   | 0,1172        | -       |
| BestAltiVar EXPO         | 3        | -305,61       | 617,35        | 0,005        | 5,0749       | -        | 3,6911        | 0,0001  |
| BAltiVarDAAltiVar EXPO   | 4        | -311,06       | 630,34        | 0            | 0,0041       | 0,0027   | 0,0591        | 0,0008  |

Abbreviations: NP, number of free parameters; logL, log-likelihood;  $\lambda$ , speciation rate;  $\alpha$ , rate of variation of the speciation according to the palaeo-environmental variable;  $\mu$ , extinction rate;  $\beta$ , rate of variation of the extinction according to the palaeo-environmental variable.
